# Supplementary material
Source: publisher figshare collection journal article supplement (https://gsajournals.figshare.com/ndownloader/files/13173398)
Supplement: Supplementary file 1 [file 13173398]

	date	experiment	round	assay	condition	control	plate	row	col	strain	trait	phenotype
1	NA	NA	NA	NA	water	NA	1	A	1	N2	cv.EXT	0.928181870067136
2	NA	NA	NA	NA	water	NA	1	A	1	N2	cv.TOF	0.561986447125132
3	NA	NA	NA	NA	water	NA	1	A	1	N2	mean.EXT	825.303879310345
4	NA	NA	NA	NA	water	NA	1	A	1	N2	mean.norm.EXT	2.68344338820619
5	NA	NA	NA	NA	water	NA	1	A	1	N2	mean.TOF	264.752155172414
6	NA	NA	NA	NA	water	NA	1	A	1	N2	median.EXT	606.5
7	NA	NA	NA	NA	water	NA	1	A	1	N2	median.norm.EXT	2.29621830729334
8	NA	NA	NA	NA	water	NA	1	A	1	N2	median.TOF	236.5
9	NA	NA	NA	NA	water	NA	1	A	1	N2	n	464
10	NA	NA	NA	NA	water	NA	1	A	1	N2	norm.n	154.666666666667
11	NA	NA	NA	NA	water	NA	1	A	1	N2	q10.EXT	128.3
12	NA	NA	NA	NA	water	NA	1	A	1	N2	q10.norm.EXT	1.23213948213948
13	NA	NA	NA	NA	water	NA	1	A	1	N2	q10.TOF	94
14	NA	NA	NA	NA	water	NA	1	A	1	N2	q25.EXT	227
15	NA	NA	NA	NA	water	NA	1	A	1	N2	q25.norm.EXT	1.60782945736434
16	NA	NA	NA	NA	water	NA	1	A	1	N2	q25.TOF	140
17	NA	NA	NA	NA	water	NA	1	A	1	N2	q75.EXT	1186.25
18	NA	NA	NA	NA	water	NA	1	A	1	N2	q75.norm.EXT	3.49727654829302
19	NA	NA	NA	NA	water	NA	1	A	1	N2	q75.TOF	362.25
20	NA	NA	NA	NA	water	NA	1	A	1	N2	q90.EXT	1859.5
21	NA	NA	NA	NA	water	NA	1	A	1	N2	q90.norm.EXT	4.69336283185841
22	NA	NA	NA	NA	water	NA	1	A	1	N2	q90.TOF	482.1
23	NA	NA	NA	NA	water	NA	1	A	1	N2	var.EXT	586805.175276495
24	NA	NA	NA	NA	water	NA	1	A	1	N2	var.TOF	22137.6079867059
25	NA	NA	NA	NA	mechlorethamine200	DMSO	1	A	2	N2	cv.EXT	0.84217218726704
26	NA	NA	NA	NA	mechlorethamine200	DMSO	1	A	2	N2	cv.TOF	0.50116958234346
27	NA	NA	NA	NA	mechlorethamine200	DMSO	1	A	2	N2	mean.EXT	599.3325
28	NA	NA	NA	NA	mechlorethamine200	DMSO	1	A	2	N2	mean.norm.EXT	2.40527653792876
29	NA	NA	NA	NA	mechlorethamine200	DMSO	1	A	2	N2	mean.TOF	228.9875
30	NA	NA	NA	NA	mechlorethamine200	DMSO	1	A	2	N2	median.EXT	515.5
31	NA	NA	NA	NA	mechlorethamine200	DMSO	1	A	2	N2	median.norm.EXT	2.21710884353741
32	NA	NA	NA	NA	mechlorethamine200	DMSO	1	A	2	N2	median.TOF	204.5
33	NA	NA	NA	NA	mechlorethamine200	DMSO	1	A	2	N2	n	400
34	NA	NA	NA	NA	mechlorethamine200	DMSO	1	A	2	N2	norm.n	133.333333333333
35	NA	NA	NA	NA	mechlorethamine200	DMSO	1	A	2	N2	q10.EXT	135.8
36	NA	NA	NA	NA	mechlorethamine200	DMSO	1	A	2	N2	q10.norm.EXT	1.24588774659628
37	NA	NA	NA	NA	mechlorethamine200	DMSO	1	A	2	N2	q10.TOF	95
38	NA	NA	NA	NA	mechlorethamine200	DMSO	1	A	2	N2	q25.EXT	250.75
39	NA	NA	NA	NA	mechlorethamine200	DMSO	1	A	2	N2	q25.norm.EXT	1.55736714975845
40	NA	NA	NA	NA	mechlorethamine200	DMSO	1	A	2	N2	q25.TOF	140
41	NA	NA	NA	NA	mechlorethamine200	DMSO	1	A	2	N2	q75.EXT	799.25
42	NA	NA	NA	NA	mechlorethamine200	DMSO	1	A	2	N2	q75.norm.EXT	3.01536481934882
43	NA	NA	NA	NA	mechlorethamine200	DMSO	1	A	2	N2	q75.TOF	295.25
44	NA	NA	NA	NA	mechlorethamine200	DMSO	1	A	2	N2	q90.EXT	1216.5
45	NA	NA	NA	NA	mechlorethamine200	DMSO	1	A	2	N2	q90.norm.EXT	3.87243356028992
46	NA	NA	NA	NA	mechlorethamine200	DMSO	1	A	2	N2	q90.TOF	397.1
47	NA	NA	NA	NA	mechlorethamine200	DMSO	1	A	2	N2	var.EXT	254763.641046366
48	NA	NA	NA	NA	mechlorethamine200	DMSO	1	A	2	N2	var.TOF	13170.2178884712
49	NA	NA	NA	NA	mechlorethamine300	DMSO	1	A	3	N2	cv.EXT	1.05761976870493
50	NA	NA	NA	NA	mechlorethamine300	DMSO	1	A	3	N2	cv.TOF	0.535720447988974
51	NA	NA	NA	NA	mechlorethamine300	DMSO	1	A	3	N2	mean.EXT	531.635294117647
52	NA	NA	NA	NA	mechlorethamine300	DMSO	1	A	3	N2	mean.norm.EXT	2.34288227621584
53	NA	NA	NA	NA	mechlorethamine300	DMSO	1	A	3	N2	mean.TOF	206.711764705882
54	NA	NA	NA	NA	mechlorethamine300	DMSO	1	A	3	N2	median.EXT	418.5
55	NA	NA	NA	NA	mechlorethamine300	DMSO	1	A	3	N2	median.norm.EXT	2.16016030174446
56	NA	NA	NA	NA	mechlorethamine300	DMSO	1	A	3	N2	median.TOF	182.5
57	NA	NA	NA	NA	mechlorethamine300	DMSO	1	A	3	N2	n	340
58	NA	NA	NA	NA	mechlorethamine300	DMSO	1	A	3	N2	norm.n	113.333333333333
59	NA	NA	NA	NA	mechlorethamine300	DMSO	1	A	3	N2	q10.EXT	127.4
60	NA	NA	NA	NA	mechlorethamine300	DMSO	1	A	3	N2	q10.norm.EXT	1.2661738499109
61	NA	NA	NA	NA	mechlorethamine300	DMSO	1	A	3	N2	q10.TOF	86.9
62	NA	NA	NA	NA	mechlorethamine300	DMSO	1	A	3	N2	q25.EXT	236
63	NA	NA	NA	NA	mechlorethamine300	DMSO	1	A	3	N2	q25.norm.EXT	1.54476164079823
64	NA	NA	NA	NA	mechlorethamine300	DMSO	1	A	3	N2	q25.TOF	129.25
65	NA	NA	NA	NA	mechlorethamine300	DMSO	1	A	3	N2	q75.EXT	685.25
66	NA	NA	NA	NA	mechlorethamine300	DMSO	1	A	3	N2	q75.norm.EXT	2.84642094017094
67	NA	NA	NA	NA	mechlorethamine300	DMSO	1	A	3	N2	q75.TOF	260
68	NA	NA	NA	NA	mechlorethamine300	DMSO	1	A	3	N2	q90.EXT	989.9
69	NA	NA	NA	NA	mechlorethamine300	DMSO	1	A	3	N2	q90.norm.EXT	3.66795580110497
70	NA	NA	NA	NA	mechlorethamine300	DMSO	1	A	3	N2	q90.TOF	338
71	NA	NA	NA	NA	mechlorethamine300	DMSO	1	A	3	N2	var.EXT	316145.300225577
72	NA	NA	NA	NA	mechlorethamine300	DMSO	1	A	3	N2	var.TOF	12263.2854069061
73	NA	NA	NA	NA	mechlorethamine400	DMSO	1	A	4	N2	cv.EXT	1.34876717174108
74	NA	NA	NA	NA	mechlorethamine400	DMSO	1	A	4	N2	cv.TOF	0.702690799586271
75	NA	NA	NA	NA	mechlorethamine400	DMSO	1	A	4	N2	mean.EXT	454.220858895706
76	NA	NA	NA	NA	mechlorethamine400	DMSO	1	A	4	N2	mean.norm.EXT	2.05321943971052
77	NA	NA	NA	NA	mechlorethamine400	DMSO	1	A	4	N2	mean.TOF	192.423312883436
78	NA	NA	NA	NA	mechlorethamine400	DMSO	1	A	4	N2	median.EXT	330
79	NA	NA	NA	NA	mechlorethamine400	DMSO	1	A	4	N2	median.norm.EXT	1.85507246376812
80	NA	NA	NA	NA	mechlorethamine400	DMSO	1	A	4	N2	median.TOF	154
81	NA	NA	NA	NA	mechlorethamine400	DMSO	1	A	4	N2	n	163
82	NA	NA	NA	NA	mechlorethamine400	DMSO	1	A	4	N2	norm.n	54.3333333333333
83	NA	NA	NA	NA	mechlorethamine400	DMSO	1	A	4	N2	q10.EXT	112.4
84	NA	NA	NA	NA	mechlorethamine400	DMSO	1	A	4	N2	q10.norm.EXT	1.20543958010259
85	NA	NA	NA	NA	mechlorethamine400	DMSO	1	A	4	N2	q10.TOF	78
86	NA	NA	NA	NA	mechlorethamine400	DMSO	1	A	4	N2	q25.EXT	162
87	NA	NA	NA	NA	mechlorethamine400	DMSO	1	A	4	N2	q25.norm.EXT	1.44316447970705
88	NA	NA	NA	NA	mechlorethamine400	DMSO	1	A	4	N2	q25.TOF	103.5
89	NA	NA	NA	NA	mechlorethamine400	DMSO	1	A	4	N2	q75.EXT	474.5
90	NA	NA	NA	NA	mechlorethamine400	DMSO	1	A	4	N2	q75.norm.EXT	2.39300527903469
91	NA	NA	NA	NA	mechlorethamine400	DMSO	1	A	4	N2	q75.TOF	240.5
92	NA	NA	NA	NA	mechlorethamine400	DMSO	1	A	4	N2	q90.EXT	741.6
93	NA	NA	NA	NA	mechlorethamine400	DMSO	1	A	4	N2	q90.norm.EXT	2.92422895170987
94	NA	NA	NA	NA	mechlorethamine400	DMSO	1	A	4	N2	q90.TOF	318.8
95	NA	NA	NA	NA	mechlorethamine400	DMSO	1	A	4	N2	var.EXT	375325.543512838
96	NA	NA	NA	NA	mechlorethamine400	DMSO	1	A	4	N2	var.TOF	18282.8505642657
97	NA	NA	NA	NA	mechlorethamine500	DMSO	1	A	5	N2	cv.EXT	1.59829390708755
98	NA	NA	NA	NA	mechlorethamine500	DMSO	1	A	5	N2	cv.TOF	0.700258615611215
99	NA	NA	NA	NA	mechlorethamine500	DMSO	1	A	5	N2	mean.EXT	444.7
100	NA	NA	NA	NA	mechlorethamine500	DMSO	1	A	5	N2	mean.norm.EXT	2.18774749028988
101	NA	NA	NA	NA	mechlorethamine500	DMSO	1	A	5	N2	mean.TOF	168.27
102	NA	NA	NA	NA	mechlorethamine500	DMSO	1	A	5	N2	median.EXT	245.5
103	NA	NA	NA	NA	mechlorethamine500	DMSO	1	A	5	N2	median.norm.EXT	1.61612201133054
104	NA	NA	NA	NA	mechlorethamine500	DMSO	1	A	5	N2	median.TOF	135
105	NA	NA	NA	NA	mechlorethamine500	DMSO	1	A	5	N2	n	100
106	NA	NA	NA	NA	mechlorethamine500	DMSO	1	A	5	N2	norm.n	33.3333333333333
107	NA	NA	NA	NA	mechlorethamine500	DMSO	1	A	5	N2	q10.EXT	106.9
108	NA	NA	NA	NA	mechlorethamine500	DMSO	1	A	5	N2	q10.norm.EXT	1.17541347541348
109	NA	NA	NA	NA	mechlorethamine500	DMSO	1	A	5	N2	q10.TOF	73
110	NA	NA	NA	NA	mechlorethamine500	DMSO	1	A	5	N2	q25.EXT	152.5
111	NA	NA	NA	NA	mechlorethamine500	DMSO	1	A	5	N2	q25.norm.EXT	1.34684684684685
112	NA	NA	NA	NA	mechlorethamine500	DMSO	1	A	5	N2	q25.TOF	91.75
113	NA	NA	NA	NA	mechlorethamine500	DMSO	1	A	5	N2	q75.EXT	403.25
114	NA	NA	NA	NA	mechlorethamine500	DMSO	1	A	5	N2	q75.norm.EXT	2.38817640692641
115	NA	NA	NA	NA	mechlorethamine500	DMSO	1	A	5	N2	q75.TOF	204.75
116	NA	NA	NA	NA	mechlorethamine500	DMSO	1	A	5	N2	q90.EXT	593.6
117	NA	NA	NA	NA	mechlorethamine500	DMSO	1	A	5	N2	q90.norm.EXT	3.85035189075631
118	NA	NA	NA	NA	mechlorethamine500	DMSO	1	A	5	N2	q90.TOF	263.8
119	NA	NA	NA	NA	mechlorethamine500	DMSO	1	A	5	N2	var.EXT	505181.626262626
120	NA	NA	NA	NA	mechlorethamine500	DMSO	1	A	5	N2	var.TOF	13884.5021212121
121	NA	NA	NA	NA	mechlorethamine200	DMSO	1	A	8	CB4856	cv.EXT	1.00865873165386
122	NA	NA	NA	NA	mechlorethamine200	DMSO	1	A	8	CB4856	cv.TOF	0.603849146150107
123	NA	NA	NA	NA	mechlorethamine200	DMSO	1	A	8	CB4856	mean.EXT	615.743902439024
124	NA	NA	NA	NA	mechlorethamine200	DMSO	1	A	8	CB4856	mean.norm.EXT	2.48187813930063
125	NA	NA	NA	NA	mechlorethamine200	DMSO	1	A	8	CB4856	mean.TOF	222.390243902439
126	NA	NA	NA	NA	mechlorethamine200	DMSO	1	A	8	CB4856	median.EXT	449.5
127	NA	NA	NA	NA	mechlorethamine200	DMSO	1	A	8	CB4856	median.norm.EXT	2.1594883961432
128	NA	NA	NA	NA	mechlorethamine200	DMSO	1	A	8	CB4856	median.TOF	199
129	NA	NA	NA	NA	mechlorethamine200	DMSO	1	A	8	CB4856	n	164
130	NA	NA	NA	NA	mechlorethamine200	DMSO	1	A	8	CB4856	norm.n	164
131	NA	NA	NA	NA	mechlorethamine200	DMSO	1	A	8	CB4856	q10.EXT	126.2
132	NA	NA	NA	NA	mechlorethamine200	DMSO	1	A	8	CB4856	q10.norm.EXT	1.35094905094905
133	NA	NA	NA	NA	mechlorethamine200	DMSO	1	A	8	CB4856	q10.TOF	80.3
134	NA	NA	NA	NA	mechlorethamine200	DMSO	1	A	8	CB4856	q25.EXT	246
135	NA	NA	NA	NA	mechlorethamine200	DMSO	1	A	8	CB4856	q25.norm.EXT	1.68527935543521
136	NA	NA	NA	NA	mechlorethamine200	DMSO	1	A	8	CB4856	q25.TOF	116.75
137	NA	NA	NA	NA	mechlorethamine200	DMSO	1	A	8	CB4856	q75.EXT	807.25
138	NA	NA	NA	NA	mechlorethamine200	DMSO	1	A	8	CB4856	q75.norm.EXT	3.06963638716356
139	NA	NA	NA	NA	mechlorethamine200	DMSO	1	A	8	CB4856	q75.TOF	281.25
140	NA	NA	NA	NA	mechlorethamine200	DMSO	1	A	8	CB4856	q90.EXT	1186.9
141	NA	NA	NA	NA	mechlorethamine200	DMSO	1	A	8	CB4856	q90.norm.EXT	3.96045491915593
142	NA	NA	NA	NA	mechlorethamine200	DMSO	1	A	8	CB4856	q90.TOF	386.1
143	NA	NA	NA	NA	mechlorethamine200	DMSO	1	A	8	CB4856	var.EXT	385734.731557684
144	NA	NA	NA	NA	mechlorethamine200	DMSO	1	A	8	CB4856	var.TOF	18033.8467754003
145	NA	NA	NA	NA	mechlorethamine300	DMSO	1	B	3	DL238	cv.EXT	1.2009746562715
146	NA	NA	NA	NA	mechlorethamine300	DMSO	1	B	3	DL238	cv.TOF	0.613192818883142
147	NA	NA	NA	NA	mechlorethamine300	DMSO	1	B	3	DL238	mean.EXT	564.680497925311
148	NA	NA	NA	NA	mechlorethamine300	DMSO	1	B	3	DL238	mean.norm.EXT	2.36018527089783
149	NA	NA	NA	NA	mechlorethamine300	DMSO	1	B	3	DL238	mean.TOF	206.958506224066
150	NA	NA	NA	NA	mechlorethamine300	DMSO	1	B	3	DL238	median.EXT	395
151	NA	NA	NA	NA	mechlorethamine300	DMSO	1	B	3	DL238	median.norm.EXT	2.04147465437788
152	NA	NA	NA	NA	mechlorethamine300	DMSO	1	B	3	DL238	median.TOF	182
153	NA	NA	NA	NA	mechlorethamine300	DMSO	1	B	3	DL238	n	241
154	NA	NA	NA	NA	mechlorethamine300	DMSO	1	B	3	DL238	norm.n	80.3333333333333
155	NA	NA	NA	NA	mechlorethamine300	DMSO	1	B	3	DL238	q10.EXT	119
156	NA	NA	NA	NA	mechlorethamine300	DMSO	1	B	3	DL238	q10.norm.EXT	1.28440366972477
157	NA	NA	NA	NA	mechlorethamine300	DMSO	1	B	3	DL238	q10.TOF	78
158	NA	NA	NA	NA	mechlorethamine300	DMSO	1	B	3	DL238	q25.EXT	187
159	NA	NA	NA	NA	mechlorethamine300	DMSO	1	B	3	DL238	q25.norm.EXT	1.56896551724138
160	NA	NA	NA	NA	mechlorethamine300	DMSO	1	B	3	DL238	q25.TOF	109
161	NA	NA	NA	NA	mechlorethamine300	DMSO	1	B	3	DL238	q75.EXT	671
162	NA	NA	NA	NA	mechlorethamine300	DMSO	1	B	3	DL238	q75.norm.EXT	2.6865671641791
163	NA	NA	NA	NA	mechlorethamine300	DMSO	1	B	3	DL238	q75.TOF	273
164	NA	NA	NA	NA	mechlorethamine300	DMSO	1	B	3	DL238	q90.EXT	1093
165	NA	NA	NA	NA	mechlorethamine300	DMSO	1	B	3	DL238	q90.norm.EXT	3.91880341880342
166	NA	NA	NA	NA	mechlorethamine300	DMSO	1	B	3	DL238	q90.TOF	350
167	NA	NA	NA	NA	mechlorethamine300	DMSO	1	B	3	DL238	var.EXT	459910.434993084
168	NA	NA	NA	NA	mechlorethamine300	DMSO	1	B	3	DL238	var.TOF	16104.9982710927
169	NA	NA	NA	NA	mechlorethamine400	DMSO	1	B	4	DL238	cv.EXT	1.43688911708024
170	NA	NA	NA	NA	mechlorethamine400	DMSO	1	B	4	DL238	cv.TOF	0.749942125836906
171	NA	NA	NA	NA	mechlorethamine400	DMSO	1	B	4	DL238	mean.EXT	491.024096385542
172	NA	NA	NA	NA	mechlorethamine400	DMSO	1	B	4	DL238	mean.norm.EXT	2.3875427558495
173	NA	NA	NA	NA	mechlorethamine400	DMSO	1	B	4	DL238	mean.TOF	177.512048192771
174	NA	NA	NA	NA	mechlorethamine400	DMSO	1	B	4	DL238	median.EXT	307
175	NA	NA	NA	NA	mechlorethamine400	DMSO	1	B	4	DL238	median.norm.EXT	2.01474953617811
176	NA	NA	NA	NA	mechlorethamine400	DMSO	1	B	4	DL238	median.TOF	134
177	NA	NA	NA	NA	mechlorethamine400	DMSO	1	B	4	DL238	n	166
178	NA	NA	NA	NA	mechlorethamine400	DMSO	1	B	4	DL238	norm.n	55.3333333333333
179	NA	NA	NA	NA	mechlorethamine400	DMSO	1	B	4	DL238	q10.EXT	116.5
180	NA	NA	NA	NA	mechlorethamine400	DMSO	1	B	4	DL238	q10.norm.EXT	1.2877302436126
181	NA	NA	NA	NA	mechlorethamine400	DMSO	1	B	4	DL238	q10.TOF	70
182	NA	NA	NA	NA	mechlorethamine400	DMSO	1	B	4	DL238	q25.EXT	175
183	NA	NA	NA	NA	mechlorethamine400	DMSO	1	B	4	DL238	q25.norm.EXT	1.614631843927
184	NA	NA	NA	NA	mechlorethamine400	DMSO	1	B	4	DL238	q25.TOF	99
185	NA	NA	NA	NA	mechlorethamine400	DMSO	1	B	4	DL238	q75.EXT	512.75
186	NA	NA	NA	NA	mechlorethamine400	DMSO	1	B	4	DL238	q75.norm.EXT	2.78899621212121
187	NA	NA	NA	NA	mechlorethamine400	DMSO	1	B	4	DL238	q75.TOF	221
188	NA	NA	NA	NA	mechlorethamine400	DMSO	1	B	4	DL238	q90.EXT	844
189	NA	NA	NA	NA	mechlorethamine400	DMSO	1	B	4	DL238	q90.norm.EXT	4.04298245614035
190	NA	NA	NA	NA	mechlorethamine400	DMSO	1	B	4	DL238	q90.TOF	298.5
191	NA	NA	NA	NA	mechlorethamine400	DMSO	1	B	4	DL238	var.EXT	497796.823658269
192	NA	NA	NA	NA	mechlorethamine400	DMSO	1	B	4	DL238	var.TOF	17721.9362175977
193	NA	NA	NA	NA	water	NA	1	B	7	JU258	cv.EXT	0.871591031324704
194	NA	NA	NA	NA	water	NA	1	B	7	JU258	cv.TOF	0.548225704207209
195	NA	NA	NA	NA	water	NA	1	B	7	JU258	mean.EXT	914.794871794872
196	NA	NA	NA	NA	water	NA	1	B	7	JU258	mean.norm.EXT	3.05096131174958
197	NA	NA	NA	NA	water	NA	1	B	7	JU258	mean.TOF	270.48717948718
198	NA	NA	NA	NA	water	NA	1	B	7	JU258	median.EXT	804
199	NA	NA	NA	NA	water	NA	1	B	7	JU258	median.norm.EXT	2.78779069767442
200	NA	NA	NA	NA	water	NA	1	B	7	JU258	median.TOF	265
201	NA	NA	NA	NA	water	NA	1	B	7	JU258	n	117
202	NA	NA	NA	NA	water	NA	1	B	7	JU258	norm.n	117
203	NA	NA	NA	NA	water	NA	1	B	7	JU258	q10.EXT	172.4
204	NA	NA	NA	NA	water	NA	1	B	7	JU258	q10.norm.EXT	1.37859952793076
205	NA	NA	NA	NA	water	NA	1	B	7	JU258	q10.TOF	88
206	NA	NA	NA	NA	water	NA	1	B	7	JU258	q25.EXT	330
207	NA	NA	NA	NA	water	NA	1	B	7	JU258	q25.norm.EXT	2.04225352112676
208	NA	NA	NA	NA	water	NA	1	B	7	JU258	q25.TOF	156
209	NA	NA	NA	NA	water	NA	1	B	7	JU258	q75.EXT	1290
210	NA	NA	NA	NA	water	NA	1	B	7	JU258	q75.norm.EXT	3.83928571428571
211	NA	NA	NA	NA	water	NA	1	B	7	JU258	q75.TOF	361
212	NA	NA	NA	NA	water	NA	1	B	7	JU258	q90.EXT	1748.2
213	NA	NA	NA	NA	water	NA	1	B	7	JU258	q90.norm.EXT	4.85705653283201
214	NA	NA	NA	NA	water	NA	1	B	7	JU258	q90.TOF	430.4
215	NA	NA	NA	NA	water	NA	1	B	7	JU258	var.EXT	635730.354111405
216	NA	NA	NA	NA	water	NA	1	B	7	JU258	var.TOF	21989.3381962865
217	NA	NA	NA	NA	mechlorethamine200	DMSO	1	B	8	JU258	cv.EXT	0.897733620623313
218	NA	NA	NA	NA	mechlorethamine200	DMSO	1	B	8	JU258	cv.TOF	0.504603963998125
219	NA	NA	NA	NA	mechlorethamine200	DMSO	1	B	8	JU258	mean.EXT	646.076190476191
220	NA	NA	NA	NA	mechlorethamine200	DMSO	1	B	8	JU258	mean.norm.EXT	2.61889156324901
221	NA	NA	NA	NA	mechlorethamine200	DMSO	1	B	8	JU258	mean.TOF	230.014285714286
222	NA	NA	NA	NA	mechlorethamine200	DMSO	1	B	8	JU258	median.EXT	503
223	NA	NA	NA	NA	mechlorethamine200	DMSO	1	B	8	JU258	median.norm.EXT	2.37013416477702
224	NA	NA	NA	NA	mechlorethamine200	DMSO	1	B	8	JU258	median.TOF	213
225	NA	NA	NA	NA	mechlorethamine200	DMSO	1	B	8	JU258	n	210
226	NA	NA	NA	NA	mechlorethamine200	DMSO	1	B	8	JU258	norm.n	105
227	NA	NA	NA	NA	mechlorethamine200	DMSO	1	B	8	JU258	q10.EXT	171.9
228	NA	NA	NA	NA	mechlorethamine200	DMSO	1	B	8	JU258	q10.norm.EXT	1.48937619757292
229	NA	NA	NA	NA	mechlorethamine200	DMSO	1	B	8	JU258	q10.TOF	92.7
230	NA	NA	NA	NA	mechlorethamine200	DMSO	1	B	8	JU258	q25.EXT	336.25
231	NA	NA	NA	NA	mechlorethamine200	DMSO	1	B	8	JU258	q25.norm.EXT	1.85117764053177
232	NA	NA	NA	NA	mechlorethamine200	DMSO	1	B	8	JU258	q25.TOF	152.5
233	NA	NA	NA	NA	mechlorethamine200	DMSO	1	B	8	JU258	q75.EXT	803
234	NA	NA	NA	NA	mechlorethamine200	DMSO	1	B	8	JU258	q75.norm.EXT	3.26765225066196
235	NA	NA	NA	NA	mechlorethamine200	DMSO	1	B	8	JU258	q75.TOF	301.5
236	NA	NA	NA	NA	mechlorethamine200	DMSO	1	B	8	JU258	q90.EXT	1207.9
237	NA	NA	NA	NA	mechlorethamine200	DMSO	1	B	8	JU258	q90.norm.EXT	4.03560674768728
238	NA	NA	NA	NA	mechlorethamine200	DMSO	1	B	8	JU258	q90.TOF	369.4
239	NA	NA	NA	NA	mechlorethamine200	DMSO	1	B	8	JU258	var.EXT	336405.008521303
240	NA	NA	NA	NA	mechlorethamine200	DMSO	1	B	8	JU258	var.TOF	13471.3442925496
241	NA	NA	NA	NA	mechlorethamine300	DMSO	1	B	9	JU258	cv.EXT	1.03326136067333
242	NA	NA	NA	NA	mechlorethamine300	DMSO	1	B	9	JU258	cv.TOF	0.562791309076498
243	NA	NA	NA	NA	mechlorethamine300	DMSO	1	B	9	JU258	mean.EXT	453.546052631579
244	NA	NA	NA	NA	mechlorethamine300	DMSO	1	B	9	JU258	mean.norm.EXT	2.37283244307072
245	NA	NA	NA	NA	mechlorethamine300	DMSO	1	B	9	JU258	mean.TOF	180.611842105263
246	NA	NA	NA	NA	mechlorethamine300	DMSO	1	B	9	JU258	median.EXT	388.5
247	NA	NA	NA	NA	mechlorethamine300	DMSO	1	B	9	JU258	median.norm.EXT	2.06081989247312
248	NA	NA	NA	NA	mechlorethamine300	DMSO	1	B	9	JU258	median.TOF	156.5
249	NA	NA	NA	NA	mechlorethamine300	DMSO	1	B	9	JU258	n	152
250	NA	NA	NA	NA	mechlorethamine300	DMSO	1	B	9	JU258	norm.n	76
251	NA	NA	NA	NA	mechlorethamine300	DMSO	1	B	9	JU258	q10.EXT	132.2
252	NA	NA	NA	NA	mechlorethamine300	DMSO	1	B	9	JU258	q10.norm.EXT	1.3611858974359
253	NA	NA	NA	NA	mechlorethamine300	DMSO	1	B	9	JU258	q10.TOF	82
254	NA	NA	NA	NA	mechlorethamine300	DMSO	1	B	9	JU258	q25.EXT	207
255	NA	NA	NA	NA	mechlorethamine300	DMSO	1	B	9	JU258	q25.norm.EXT	1.6763190121441
256	NA	NA	NA	NA	mechlorethamine300	DMSO	1	B	9	JU258	q25.TOF	107.25
257	NA	NA	NA	NA	mechlorethamine300	DMSO	1	B	9	JU258	q75.EXT	540.25
258	NA	NA	NA	NA	mechlorethamine300	DMSO	1	B	9	JU258	q75.norm.EXT	2.88685636856369
259	NA	NA	NA	NA	mechlorethamine300	DMSO	1	B	9	JU258	q75.TOF	227
260	NA	NA	NA	NA	mechlorethamine300	DMSO	1	B	9	JU258	q90.EXT	709.4
261	NA	NA	NA	NA	mechlorethamine300	DMSO	1	B	9	JU258	q90.norm.EXT	3.80685543964233
262	NA	NA	NA	NA	mechlorethamine300	DMSO	1	B	9	JU258	q90.TOF	292.8
263	NA	NA	NA	NA	mechlorethamine300	DMSO	1	B	9	JU258	var.EXT	219615.587269083
264	NA	NA	NA	NA	mechlorethamine300	DMSO	1	B	9	JU258	var.TOF	10332.0668787034
265	NA	NA	NA	NA	mechlorethamine400	DMSO	1	B	10	JU258	cv.EXT	1.59360458216353
266	NA	NA	NA	NA	mechlorethamine400	DMSO	1	B	10	JU258	cv.TOF	0.852285612666945
267	NA	NA	NA	NA	mechlorethamine400	DMSO	1	B	10	JU258	mean.EXT	347.241379310345
268	NA	NA	NA	NA	mechlorethamine400	DMSO	1	B	10	JU258	mean.norm.EXT	2.15369836172281
269	NA	NA	NA	NA	mechlorethamine400	DMSO	1	B	10	JU258	mean.TOF	145.218390804598
270	NA	NA	NA	NA	mechlorethamine400	DMSO	1	B	10	JU258	median.EXT	237
271	NA	NA	NA	NA	mechlorethamine400	DMSO	1	B	10	JU258	median.norm.EXT	1.63485477178423
272	NA	NA	NA	NA	mechlorethamine400	DMSO	1	B	10	JU258	median.TOF	110
273	NA	NA	NA	NA	mechlorethamine400	DMSO	1	B	10	JU258	n	87
274	NA	NA	NA	NA	mechlorethamine400	DMSO	1	B	10	JU258	norm.n	87
275	NA	NA	NA	NA	mechlorethamine400	DMSO	1	B	10	JU258	q10.EXT	100.6
276	NA	NA	NA	NA	mechlorethamine400	DMSO	1	B	10	JU258	q10.norm.EXT	1.09933333333333
277	NA	NA	NA	NA	mechlorethamine400	DMSO	1	B	10	JU258	q10.TOF	67.6
278	NA	NA	NA	NA	mechlorethamine400	DMSO	1	B	10	JU258	q25.EXT	130
279	NA	NA	NA	NA	mechlorethamine400	DMSO	1	B	10	JU258	q25.norm.EXT	1.33020402128918
280	NA	NA	NA	NA	mechlorethamine400	DMSO	1	B	10	JU258	q25.TOF	85.5
281	NA	NA	NA	NA	mechlorethamine400	DMSO	1	B	10	JU258	q75.EXT	348
282	NA	NA	NA	NA	mechlorethamine400	DMSO	1	B	10	JU258	q75.norm.EXT	2.66830590124448
283	NA	NA	NA	NA	mechlorethamine400	DMSO	1	B	10	JU258	q75.TOF	171
284	NA	NA	NA	NA	mechlorethamine400	DMSO	1	B	10	JU258	q90.EXT	536.8
285	NA	NA	NA	NA	mechlorethamine400	DMSO	1	B	10	JU258	q90.norm.EXT	4.1192628992629
286	NA	NA	NA	NA	mechlorethamine400	DMSO	1	B	10	JU258	q90.TOF	221.2
287	NA	NA	NA	NA	mechlorethamine400	DMSO	1	B	10	JU258	var.EXT	306213.324779471
288	NA	NA	NA	NA	mechlorethamine400	DMSO	1	B	10	JU258	var.TOF	15318.4052392408
289	NA	NA	NA	NA	mechlorethamine500	DMSO	1	B	11	JU258	cv.EXT	1.41176302949682
290	NA	NA	NA	NA	mechlorethamine500	DMSO	1	B	11	JU258	cv.TOF	0.863927184505739
291	NA	NA	NA	NA	mechlorethamine500	DMSO	1	B	11	JU258	mean.EXT	379.943820224719
292	NA	NA	NA	NA	mechlorethamine500	DMSO	1	B	11	JU258	mean.norm.EXT	2.45748778028443
293	NA	NA	NA	NA	mechlorethamine500	DMSO	1	B	11	JU258	mean.TOF	139.741573033708
294	NA	NA	NA	NA	mechlorethamine500	DMSO	1	B	11	JU258	median.EXT	235
295	NA	NA	NA	NA	mechlorethamine500	DMSO	1	B	11	JU258	median.norm.EXT	2.21739130434783
296	NA	NA	NA	NA	mechlorethamine500	DMSO	1	B	11	JU258	median.TOF	98
297	NA	NA	NA	NA	mechlorethamine500	DMSO	1	B	11	JU258	n	89
298	NA	NA	NA	NA	mechlorethamine500	DMSO	1	B	11	JU258	norm.n	89
299	NA	NA	NA	NA	mechlorethamine500	DMSO	1	B	11	JU258	q10.EXT	105.8
300	NA	NA	NA	NA	mechlorethamine500	DMSO	1	B	11	JU258	q10.norm.EXT	1.15903225806452
301	NA	NA	NA	NA	mechlorethamine500	DMSO	1	B	11	JU258	q10.TOF	66.8
302	NA	NA	NA	NA	mechlorethamine500	DMSO	1	B	11	JU258	q25.EXT	133
303	NA	NA	NA	NA	mechlorethamine500	DMSO	1	B	11	JU258	q25.norm.EXT	1.35714285714286
304	NA	NA	NA	NA	mechlorethamine500	DMSO	1	B	11	JU258	q25.TOF	78
305	NA	NA	NA	NA	mechlorethamine500	DMSO	1	B	11	JU258	q75.EXT	367
306	NA	NA	NA	NA	mechlorethamine500	DMSO	1	B	11	JU258	q75.norm.EXT	3.13888888888889
307	NA	NA	NA	NA	mechlorethamine500	DMSO	1	B	11	JU258	q75.TOF	140
308	NA	NA	NA	NA	mechlorethamine500	DMSO	1	B	11	JU258	q90.EXT	692.8
309	NA	NA	NA	NA	mechlorethamine500	DMSO	1	B	11	JU258	q90.norm.EXT	4.27496503496504
310	NA	NA	NA	NA	mechlorethamine500	DMSO	1	B	11	JU258	q90.TOF	231.4
311	NA	NA	NA	NA	mechlorethamine500	DMSO	1	B	11	JU258	var.EXT	287714.917262513
312	NA	NA	NA	NA	mechlorethamine500	DMSO	1	B	11	JU258	var.TOF	14574.8983656793
313	NA	NA	NA	NA	water	NA	1	C	1	DL238	cv.EXT	0.9866957077787
314	NA	NA	NA	NA	water	NA	1	C	1	DL238	cv.TOF	0.552709529124006
315	NA	NA	NA	NA	water	NA	1	C	1	DL238	mean.EXT	790.141414141414
316	NA	NA	NA	NA	water	NA	1	C	1	DL238	mean.norm.EXT	2.62420440174506
317	NA	NA	NA	NA	water	NA	1	C	1	DL238	mean.TOF	261.776094276094
318	NA	NA	NA	NA	water	NA	1	C	1	DL238	median.EXT	588.5
319	NA	NA	NA	NA	water	NA	1	C	1	DL238	median.norm.EXT	2.25434375835338
320	NA	NA	NA	NA	water	NA	1	C	1	DL238	median.TOF	239
321	NA	NA	NA	NA	water	NA	1	C	1	DL238	n	594
322	NA	NA	NA	NA	water	NA	1	C	1	DL238	norm.n	198
323	NA	NA	NA	NA	water	NA	1	C	1	DL238	q10.EXT	147.3
324	NA	NA	NA	NA	water	NA	1	C	1	DL238	q10.norm.EXT	1.36235238545111
325	NA	NA	NA	NA	water	NA	1	C	1	DL238	q10.TOF	97.6
326	NA	NA	NA	NA	water	NA	1	C	1	DL238	q25.EXT	275
327	NA	NA	NA	NA	water	NA	1	C	1	DL238	q25.norm.EXT	1.6956165308386
328	NA	NA	NA	NA	water	NA	1	C	1	DL238	q25.TOF	156.25
329	NA	NA	NA	NA	water	NA	1	C	1	DL238	q75.EXT	780.5
330	NA	NA	NA	NA	water	NA	1	C	1	DL238	q75.norm.EXT	3.30786733110528
331	NA	NA	NA	NA	water	NA	1	C	1	DL238	q75.TOF	332.75
332	NA	NA	NA	NA	water	NA	1	C	1	DL238	q90.EXT	1919.8
333	NA	NA	NA	NA	water	NA	1	C	1	DL238	q90.norm.EXT	4.53247330501917
334	NA	NA	NA	NA	water	NA	1	C	1	DL238	q90.TOF	475.7
335	NA	NA	NA	NA	water	NA	1	C	1	DL238	var.EXT	607821.598855332
336	NA	NA	NA	NA	water	NA	1	C	1	DL238	var.TOF	20934.0796299135
337	NA	NA	NA	NA	mechlorethamine200	DMSO	1	C	2	DL238	cv.EXT	1.06270093536433
338	NA	NA	NA	NA	mechlorethamine200	DMSO	1	C	2	DL238	cv.TOF	0.606299209495607
339	NA	NA	NA	NA	mechlorethamine200	DMSO	1	C	2	DL238	mean.EXT	773.09534368071
340	NA	NA	NA	NA	mechlorethamine200	DMSO	1	C	2	DL238	mean.norm.EXT	2.65641203611904
341	NA	NA	NA	NA	mechlorethamine200	DMSO	1	C	2	DL238	mean.TOF	249.880266075388
342	NA	NA	NA	NA	mechlorethamine200	DMSO	1	C	2	DL238	median.EXT	576
343	NA	NA	NA	NA	mechlorethamine200	DMSO	1	C	2	DL238	median.norm.EXT	2.32363636363636
344	NA	NA	NA	NA	mechlorethamine200	DMSO	1	C	2	DL238	median.TOF	210
345	NA	NA	NA	NA	mechlorethamine200	DMSO	1	C	2	DL238	n	451
346	NA	NA	NA	NA	mechlorethamine200	DMSO	1	C	2	DL238	norm.n	150.333333333333
347	NA	NA	NA	NA	mechlorethamine200	DMSO	1	C	2	DL238	q10.EXT	150
348	NA	NA	NA	NA	mechlorethamine200	DMSO	1	C	2	DL238	q10.norm.EXT	1.40944881889764
349	NA	NA	NA	NA	mechlorethamine200	DMSO	1	C	2	DL238	q10.TOF	95
350	NA	NA	NA	NA	mechlorethamine200	DMSO	1	C	2	DL238	q25.EXT	253
351	NA	NA	NA	NA	mechlorethamine200	DMSO	1	C	2	DL238	q25.norm.EXT	1.73903420523139
352	NA	NA	NA	NA	mechlorethamine200	DMSO	1	C	2	DL238	q25.TOF	138
353	NA	NA	NA	NA	mechlorethamine200	DMSO	1	C	2	DL238	q75.EXT	785.5
354	NA	NA	NA	NA	mechlorethamine200	DMSO	1	C	2	DL238	q75.norm.EXT	3.3298969072165
355	NA	NA	NA	NA	mechlorethamine200	DMSO	1	C	2	DL238	q75.TOF	321
356	NA	NA	NA	NA	mechlorethamine200	DMSO	1	C	2	DL238	q90.EXT	1857
357	NA	NA	NA	NA	mechlorethamine200	DMSO	1	C	2	DL238	q90.norm.EXT	4.30263157894737
358	NA	NA	NA	NA	mechlorethamine200	DMSO	1	C	2	DL238	q90.TOF	460
359	NA	NA	NA	NA	mechlorethamine200	DMSO	1	C	2	DL238	var.EXT	674975.859778271
360	NA	NA	NA	NA	mechlorethamine200	DMSO	1	C	2	DL238	var.TOF	22952.9189652624
361	NA	NA	NA	NA	mechlorethamine300	DMSO	1	C	3	DL238	cv.EXT	0.965148688818515
362	NA	NA	NA	NA	mechlorethamine300	DMSO	1	C	3	DL238	cv.TOF	0.571072451298066
363	NA	NA	NA	NA	mechlorethamine300	DMSO	1	C	3	DL238	mean.EXT	613.65306122449
364	NA	NA	NA	NA	mechlorethamine300	DMSO	1	C	3	DL238	mean.norm.EXT	2.46214167341315
365	NA	NA	NA	NA	mechlorethamine300	DMSO	1	C	3	DL238	mean.TOF	222.887755102041
366	NA	NA	NA	NA	mechlorethamine300	DMSO	1	C	3	DL238	median.EXT	467.5
367	NA	NA	NA	NA	mechlorethamine300	DMSO	1	C	3	DL238	median.norm.EXT	2.19444444444444
368	NA	NA	NA	NA	mechlorethamine300	DMSO	1	C	3	DL238	median.TOF	194
369	NA	NA	NA	NA	mechlorethamine300	DMSO	1	C	3	DL238	n	294
370	NA	NA	NA	NA	mechlorethamine300	DMSO	1	C	3	DL238	norm.n	98
371	NA	NA	NA	NA	mechlorethamine300	DMSO	1	C	3	DL238	q10.EXT	132.6
372	NA	NA	NA	NA	mechlorethamine300	DMSO	1	C	3	DL238	q10.norm.EXT	1.33680635505411
373	NA	NA	NA	NA	mechlorethamine300	DMSO	1	C	3	DL238	q10.TOF	87.3
374	NA	NA	NA	NA	mechlorethamine300	DMSO	1	C	3	DL238	q25.EXT	207.5
375	NA	NA	NA	NA	mechlorethamine300	DMSO	1	C	3	DL238	q25.norm.EXT	1.63379335260116
376	NA	NA	NA	NA	mechlorethamine300	DMSO	1	C	3	DL238	q25.TOF	118.75
377	NA	NA	NA	NA	mechlorethamine300	DMSO	1	C	3	DL238	q75.EXT	780.75
378	NA	NA	NA	NA	mechlorethamine300	DMSO	1	C	3	DL238	q75.norm.EXT	2.95275119617225
379	NA	NA	NA	NA	mechlorethamine300	DMSO	1	C	3	DL238	q75.TOF	300.25
380	NA	NA	NA	NA	mechlorethamine300	DMSO	1	C	3	DL238	q90.EXT	1324.2
381	NA	NA	NA	NA	mechlorethamine300	DMSO	1	C	3	DL238	q90.norm.EXT	3.89000449034576
382	NA	NA	NA	NA	mechlorethamine300	DMSO	1	C	3	DL238	q90.TOF	398.7
383	NA	NA	NA	NA	mechlorethamine300	DMSO	1	C	3	DL238	var.EXT	350779.544751689
384	NA	NA	NA	NA	mechlorethamine300	DMSO	1	C	3	DL238	var.TOF	16201.4856515985
385	NA	NA	NA	NA	mechlorethamine400	DMSO	1	C	4	DL238	cv.EXT	1.13740511256887
386	NA	NA	NA	NA	mechlorethamine400	DMSO	1	C	4	DL238	cv.TOF	0.654400102003852
387	NA	NA	NA	NA	mechlorethamine400	DMSO	1	C	4	DL238	mean.EXT	429.790540540541
388	NA	NA	NA	NA	mechlorethamine400	DMSO	1	C	4	DL238	mean.norm.EXT	2.39693491825637
389	NA	NA	NA	NA	mechlorethamine400	DMSO	1	C	4	DL238	mean.TOF	162.601351351351
390	NA	NA	NA	NA	mechlorethamine400	DMSO	1	C	4	DL238	median.EXT	278
391	NA	NA	NA	NA	mechlorethamine400	DMSO	1	C	4	DL238	median.norm.EXT	2.02982954545455
392	NA	NA	NA	NA	mechlorethamine400	DMSO	1	C	4	DL238	median.TOF	130
393	NA	NA	NA	NA	mechlorethamine400	DMSO	1	C	4	DL238	n	148
394	NA	NA	NA	NA	mechlorethamine400	DMSO	1	C	4	DL238	norm.n	49.3333333333333
395	NA	NA	NA	NA	mechlorethamine400	DMSO	1	C	4	DL238	q10.EXT	116.1
396	NA	NA	NA	NA	mechlorethamine400	DMSO	1	C	4	DL238	q10.norm.EXT	1.27569892473118
397	NA	NA	NA	NA	mechlorethamine400	DMSO	1	C	4	DL238	q10.TOF	67.7
398	NA	NA	NA	NA	mechlorethamine400	DMSO	1	C	4	DL238	q25.EXT	155.75
399	NA	NA	NA	NA	mechlorethamine400	DMSO	1	C	4	DL238	q25.norm.EXT	1.54289128609263
400	NA	NA	NA	NA	mechlorethamine400	DMSO	1	C	4	DL238	q25.TOF	84.75
401	NA	NA	NA	NA	mechlorethamine400	DMSO	1	C	4	DL238	q75.EXT	496.75
402	NA	NA	NA	NA	mechlorethamine400	DMSO	1	C	4	DL238	q75.norm.EXT	2.81134615384615
403	NA	NA	NA	NA	mechlorethamine400	DMSO	1	C	4	DL238	q75.TOF	219.25
404	NA	NA	NA	NA	mechlorethamine400	DMSO	1	C	4	DL238	q90.EXT	939.5
405	NA	NA	NA	NA	mechlorethamine400	DMSO	1	C	4	DL238	q90.norm.EXT	4.11890206812652
406	NA	NA	NA	NA	mechlorethamine400	DMSO	1	C	4	DL238	q90.TOF	287
407	NA	NA	NA	NA	mechlorethamine400	DMSO	1	C	4	DL238	var.EXT	238970.370794264
408	NA	NA	NA	NA	mechlorethamine400	DMSO	1	C	4	DL238	var.TOF	11322.3093859165
409	NA	NA	NA	NA	mechlorethamine500	DMSO	1	C	5	DL238	cv.EXT	1.240351057985
410	NA	NA	NA	NA	mechlorethamine500	DMSO	1	C	5	DL238	cv.TOF	0.641966964670987
411	NA	NA	NA	NA	mechlorethamine500	DMSO	1	C	5	DL238	mean.EXT	373.46218487395
412	NA	NA	NA	NA	mechlorethamine500	DMSO	1	C	5	DL238	mean.norm.EXT	2.70596707317938
413	NA	NA	NA	NA	mechlorethamine500	DMSO	1	C	5	DL238	mean.TOF	132.260504201681
414	NA	NA	NA	NA	mechlorethamine500	DMSO	1	C	5	DL238	median.EXT	279
415	NA	NA	NA	NA	mechlorethamine500	DMSO	1	C	5	DL238	median.norm.EXT	2.20952380952381
416	NA	NA	NA	NA	mechlorethamine500	DMSO	1	C	5	DL238	median.TOF	111
417	NA	NA	NA	NA	mechlorethamine500	DMSO	1	C	5	DL238	n	119
418	NA	NA	NA	NA	mechlorethamine500	DMSO	1	C	5	DL238	norm.n	39.6666666666667
419	NA	NA	NA	NA	mechlorethamine500	DMSO	1	C	5	DL238	q10.EXT	106.6
420	NA	NA	NA	NA	mechlorethamine500	DMSO	1	C	5	DL238	q10.norm.EXT	1.22354892205638
421	NA	NA	NA	NA	mechlorethamine500	DMSO	1	C	5	DL238	q10.TOF	70
422	NA	NA	NA	NA	mechlorethamine500	DMSO	1	C	5	DL238	q25.EXT	153
423	NA	NA	NA	NA	mechlorethamine500	DMSO	1	C	5	DL238	q25.norm.EXT	1.44102316602317
424	NA	NA	NA	NA	mechlorethamine500	DMSO	1	C	5	DL238	q25.TOF	82
425	NA	NA	NA	NA	mechlorethamine500	DMSO	1	C	5	DL238	q75.EXT	420.5
426	NA	NA	NA	NA	mechlorethamine500	DMSO	1	C	5	DL238	q75.norm.EXT	3.70774797786292
427	NA	NA	NA	NA	mechlorethamine500	DMSO	1	C	5	DL238	q75.TOF	156
428	NA	NA	NA	NA	mechlorethamine500	DMSO	1	C	5	DL238	q90.EXT	729.8
429	NA	NA	NA	NA	mechlorethamine500	DMSO	1	C	5	DL238	q90.norm.EXT	5.2574025974026
430	NA	NA	NA	NA	mechlorethamine500	DMSO	1	C	5	DL238	q90.TOF	208.8
431	NA	NA	NA	NA	mechlorethamine500	DMSO	1	C	5	DL238	var.EXT	214576.674405355
432	NA	NA	NA	NA	mechlorethamine500	DMSO	1	C	5	DL238	var.TOF	7209.17732516735
433	NA	NA	NA	NA	water	NA	1	C	7	N2	cv.EXT	0.95149499815098
434	NA	NA	NA	NA	water	NA	1	C	7	N2	cv.TOF	0.599803888866287
435	NA	NA	NA	NA	water	NA	1	C	7	N2	mean.EXT	896.700696055684
436	NA	NA	NA	NA	water	NA	1	C	7	N2	mean.norm.EXT	2.82182599315101
437	NA	NA	NA	NA	water	NA	1	C	7	N2	mean.TOF	268.638051044084
438	NA	NA	NA	NA	water	NA	1	C	7	N2	median.EXT	620
439	NA	NA	NA	NA	water	NA	1	C	7	N2	median.norm.EXT	2.41277641277641
440	NA	NA	NA	NA	water	NA	1	C	7	N2	median.TOF	251
441	NA	NA	NA	NA	water	NA	1	C	7	N2	n	431
442	NA	NA	NA	NA	water	NA	1	C	7	N2	norm.n	143.666666666667
443	NA	NA	NA	NA	water	NA	1	C	7	N2	q10.EXT	127
444	NA	NA	NA	NA	water	NA	1	C	7	N2	q10.norm.EXT	1.35897435897436
445	NA	NA	NA	NA	water	NA	1	C	7	N2	q10.TOF	85
446	NA	NA	NA	NA	water	NA	1	C	7	N2	q25.EXT	247.5
447	NA	NA	NA	NA	water	NA	1	C	7	N2	q25.norm.EXT	1.6809315491508
448	NA	NA	NA	NA	water	NA	1	C	7	N2	q25.TOF	134.5
449	NA	NA	NA	NA	water	NA	1	C	7	N2	q75.EXT	1363.5
450	NA	NA	NA	NA	water	NA	1	C	7	N2	q75.norm.EXT	3.79401080599051
451	NA	NA	NA	NA	water	NA	1	C	7	N2	q75.TOF	366.5
452	NA	NA	NA	NA	water	NA	1	C	7	N2	q90.EXT	2044
453	NA	NA	NA	NA	water	NA	1	C	7	N2	q90.norm.EXT	4.66860465116279
454	NA	NA	NA	NA	water	NA	1	C	7	N2	q90.TOF	507
455	NA	NA	NA	NA	water	NA	1	C	7	N2	var.EXT	727960.866022771
456	NA	NA	NA	NA	water	NA	1	C	7	N2	var.TOF	25962.9245022393
457	NA	NA	NA	NA	mechlorethamine200	DMSO	1	C	8	N2	cv.EXT	1.10181308105694
458	NA	NA	NA	NA	mechlorethamine200	DMSO	1	C	8	N2	cv.TOF	0.604552768625981
459	NA	NA	NA	NA	mechlorethamine200	DMSO	1	C	8	N2	mean.EXT	683.47323943662
460	NA	NA	NA	NA	mechlorethamine200	DMSO	1	C	8	N2	mean.norm.EXT	2.48940396989907
461	NA	NA	NA	NA	mechlorethamine200	DMSO	1	C	8	N2	mean.TOF	239.461971830986
462	NA	NA	NA	NA	mechlorethamine200	DMSO	1	C	8	N2	median.EXT	520
463	NA	NA	NA	NA	mechlorethamine200	DMSO	1	C	8	N2	median.norm.EXT	2.22769230769231
464	NA	NA	NA	NA	mechlorethamine200	DMSO	1	C	8	N2	median.TOF	217
465	NA	NA	NA	NA	mechlorethamine200	DMSO	1	C	8	N2	n	355
466	NA	NA	NA	NA	mechlorethamine200	DMSO	1	C	8	N2	norm.n	118.333333333333
467	NA	NA	NA	NA	mechlorethamine200	DMSO	1	C	8	N2	q10.EXT	134.2
468	NA	NA	NA	NA	mechlorethamine200	DMSO	1	C	8	N2	q10.norm.EXT	1.3136649514008
469	NA	NA	NA	NA	mechlorethamine200	DMSO	1	C	8	N2	q10.TOF	87.4
470	NA	NA	NA	NA	mechlorethamine200	DMSO	1	C	8	N2	q25.EXT	250.5
471	NA	NA	NA	NA	mechlorethamine200	DMSO	1	C	8	N2	q25.norm.EXT	1.5904532967033
472	NA	NA	NA	NA	mechlorethamine200	DMSO	1	C	8	N2	q25.TOF	136
473	NA	NA	NA	NA	mechlorethamine200	DMSO	1	C	8	N2	q75.EXT	808.5
474	NA	NA	NA	NA	mechlorethamine200	DMSO	1	C	8	N2	q75.norm.EXT	3.11530250398032
475	NA	NA	NA	NA	mechlorethamine200	DMSO	1	C	8	N2	q75.TOF	305
476	NA	NA	NA	NA	mechlorethamine200	DMSO	1	C	8	N2	q90.EXT	1443.6
477	NA	NA	NA	NA	mechlorethamine200	DMSO	1	C	8	N2	q90.norm.EXT	4.13784249715732
478	NA	NA	NA	NA	mechlorethamine200	DMSO	1	C	8	N2	q90.TOF	398.8
479	NA	NA	NA	NA	mechlorethamine200	DMSO	1	C	8	N2	var.EXT	567098.995750776
480	NA	NA	NA	NA	mechlorethamine200	DMSO	1	C	8	N2	var.TOF	20957.5995384738
481	NA	NA	NA	NA	mechlorethamine300	DMSO	1	C	9	N2	cv.EXT	1.29611486005485
482	NA	NA	NA	NA	mechlorethamine300	DMSO	1	C	9	N2	cv.TOF	0.632869040585152
483	NA	NA	NA	NA	mechlorethamine300	DMSO	1	C	9	N2	mean.EXT	504.367892976589
484	NA	NA	NA	NA	mechlorethamine300	DMSO	1	C	9	N2	mean.norm.EXT	2.14800376741647
485	NA	NA	NA	NA	mechlorethamine300	DMSO	1	C	9	N2	mean.TOF	208.113712374582
486	NA	NA	NA	NA	mechlorethamine300	DMSO	1	C	9	N2	median.EXT	359
487	NA	NA	NA	NA	mechlorethamine300	DMSO	1	C	9	N2	median.norm.EXT	1.94238683127572
488	NA	NA	NA	NA	mechlorethamine300	DMSO	1	C	9	N2	median.TOF	177
489	NA	NA	NA	NA	mechlorethamine300	DMSO	1	C	9	N2	n	299
490	NA	NA	NA	NA	mechlorethamine300	DMSO	1	C	9	N2	norm.n	99.6666666666667
491	NA	NA	NA	NA	mechlorethamine300	DMSO	1	C	9	N2	q10.EXT	136
492	NA	NA	NA	NA	mechlorethamine300	DMSO	1	C	9	N2	q10.norm.EXT	1.24776119402985
493	NA	NA	NA	NA	mechlorethamine300	DMSO	1	C	9	N2	q10.TOF	85
494	NA	NA	NA	NA	mechlorethamine300	DMSO	1	C	9	N2	q25.EXT	198.5
495	NA	NA	NA	NA	mechlorethamine300	DMSO	1	C	9	N2	q25.norm.EXT	1.47530487804878
496	NA	NA	NA	NA	mechlorethamine300	DMSO	1	C	9	N2	q25.TOF	120
497	NA	NA	NA	NA	mechlorethamine300	DMSO	1	C	9	N2	q75.EXT	577.5
498	NA	NA	NA	NA	mechlorethamine300	DMSO	1	C	9	N2	q75.norm.EXT	2.46239350372737
499	NA	NA	NA	NA	mechlorethamine300	DMSO	1	C	9	N2	q75.TOF	264
500	NA	NA	NA	NA	mechlorethamine300	DMSO	1	C	9	N2	q90.EXT	823.2
501	NA	NA	NA	NA	mechlorethamine300	DMSO	1	C	9	N2	q90.norm.EXT	3.38421833141982
502	NA	NA	NA	NA	mechlorethamine300	DMSO	1	C	9	N2	q90.TOF	347.6
503	NA	NA	NA	NA	mechlorethamine300	DMSO	1	C	9	N2	var.EXT	427348.166214002
504	NA	NA	NA	NA	mechlorethamine300	DMSO	1	C	9	N2	var.TOF	17347.1883683868
505	NA	NA	NA	NA	mechlorethamine400	DMSO	1	C	10	N2	cv.EXT	1.53906664933682
506	NA	NA	NA	NA	mechlorethamine400	DMSO	1	C	10	N2	cv.TOF	0.770944406718969
507	NA	NA	NA	NA	mechlorethamine400	DMSO	1	C	10	N2	mean.EXT	423.77027027027
508	NA	NA	NA	NA	mechlorethamine400	DMSO	1	C	10	N2	mean.norm.EXT	2.15296888835951
509	NA	NA	NA	NA	mechlorethamine400	DMSO	1	C	10	N2	mean.TOF	175.261261261261
510	NA	NA	NA	NA	mechlorethamine400	DMSO	1	C	10	N2	median.EXT	282.5
511	NA	NA	NA	NA	mechlorethamine400	DMSO	1	C	10	N2	median.norm.EXT	1.76914046549612
512	NA	NA	NA	NA	mechlorethamine400	DMSO	1	C	10	N2	median.TOF	141.5
513	NA	NA	NA	NA	mechlorethamine400	DMSO	1	C	10	N2	n	222
514	NA	NA	NA	NA	mechlorethamine400	DMSO	1	C	10	N2	norm.n	74
515	NA	NA	NA	NA	mechlorethamine400	DMSO	1	C	10	N2	q10.EXT	116.1
516	NA	NA	NA	NA	mechlorethamine400	DMSO	1	C	10	N2	q10.norm.EXT	1.21329088199431
517	NA	NA	NA	NA	mechlorethamine400	DMSO	1	C	10	N2	q10.TOF	78
518	NA	NA	NA	NA	mechlorethamine400	DMSO	1	C	10	N2	q25.EXT	171.75
519	NA	NA	NA	NA	mechlorethamine400	DMSO	1	C	10	N2	q25.norm.EXT	1.42773558244282
520	NA	NA	NA	NA	mechlorethamine400	DMSO	1	C	10	N2	q25.TOF	102
521	NA	NA	NA	NA	mechlorethamine400	DMSO	1	C	10	N2	q75.EXT	454
522	NA	NA	NA	NA	mechlorethamine400	DMSO	1	C	10	N2	q75.norm.EXT	2.52203311394488
523	NA	NA	NA	NA	mechlorethamine400	DMSO	1	C	10	N2	q75.TOF	222.75
524	NA	NA	NA	NA	mechlorethamine400	DMSO	1	C	10	N2	q90.EXT	651.9
525	NA	NA	NA	NA	mechlorethamine400	DMSO	1	C	10	N2	q90.norm.EXT	3.53960591133005
526	NA	NA	NA	NA	mechlorethamine400	DMSO	1	C	10	N2	q90.TOF	286.9
527	NA	NA	NA	NA	mechlorethamine400	DMSO	1	C	10	N2	var.EXT	425378.784089519
528	NA	NA	NA	NA	mechlorethamine400	DMSO	1	C	10	N2	var.TOF	18256.5196689903
529	NA	NA	NA	NA	mechlorethamine200	DMSO	1	D	2	JU258	cv.EXT	0.832208378528064
530	NA	NA	NA	NA	mechlorethamine200	DMSO	1	D	2	JU258	cv.TOF	0.48964524598099
531	NA	NA	NA	NA	mechlorethamine200	DMSO	1	D	2	JU258	mean.EXT	595.93137254902
532	NA	NA	NA	NA	mechlorethamine200	DMSO	1	D	2	JU258	mean.norm.EXT	2.49959410188909
533	NA	NA	NA	NA	mechlorethamine200	DMSO	1	D	2	JU258	mean.TOF	222.686274509804
534	NA	NA	NA	NA	mechlorethamine200	DMSO	1	D	2	JU258	median.EXT	503
535	NA	NA	NA	NA	mechlorethamine200	DMSO	1	D	2	JU258	median.norm.EXT	2.26944641071449
536	NA	NA	NA	NA	mechlorethamine200	DMSO	1	D	2	JU258	median.TOF	210
537	NA	NA	NA	NA	mechlorethamine200	DMSO	1	D	2	JU258	n	306
538	NA	NA	NA	NA	mechlorethamine200	DMSO	1	D	2	JU258	norm.n	102
539	NA	NA	NA	NA	mechlorethamine200	DMSO	1	D	2	JU258	q10.EXT	149.5
540	NA	NA	NA	NA	mechlorethamine200	DMSO	1	D	2	JU258	q10.norm.EXT	1.44062261711368
541	NA	NA	NA	NA	mechlorethamine200	DMSO	1	D	2	JU258	q10.TOF	92.5
542	NA	NA	NA	NA	mechlorethamine200	DMSO	1	D	2	JU258	q25.EXT	276.5
543	NA	NA	NA	NA	mechlorethamine200	DMSO	1	D	2	JU258	q25.norm.EXT	1.79085298230387
544	NA	NA	NA	NA	mechlorethamine200	DMSO	1	D	2	JU258	q25.TOF	148
545	NA	NA	NA	NA	mechlorethamine200	DMSO	1	D	2	JU258	q75.EXT	749.25
546	NA	NA	NA	NA	mechlorethamine200	DMSO	1	D	2	JU258	q75.norm.EXT	3.0497647299509
547	NA	NA	NA	NA	mechlorethamine200	DMSO	1	D	2	JU258	q75.TOF	287.75
548	NA	NA	NA	NA	mechlorethamine200	DMSO	1	D	2	JU258	q90.EXT	1167.5
549	NA	NA	NA	NA	mechlorethamine200	DMSO	1	D	2	JU258	q90.norm.EXT	3.92130542494565
550	NA	NA	NA	NA	mechlorethamine200	DMSO	1	D	2	JU258	q90.TOF	363
551	NA	NA	NA	NA	mechlorethamine200	DMSO	1	D	2	JU258	var.EXT	245955.572324012
552	NA	NA	NA	NA	mechlorethamine200	DMSO	1	D	2	JU258	var.TOF	11889.1274831244
553	NA	NA	NA	NA	mechlorethamine300	DMSO	1	D	3	JU258	cv.EXT	1.30207593761304
554	NA	NA	NA	NA	mechlorethamine300	DMSO	1	D	3	JU258	cv.TOF	0.682244890620782
555	NA	NA	NA	NA	mechlorethamine300	DMSO	1	D	3	JU258	mean.EXT	519.131868131868
556	NA	NA	NA	NA	mechlorethamine300	DMSO	1	D	3	JU258	mean.norm.EXT	2.33207040377955
557	NA	NA	NA	NA	mechlorethamine300	DMSO	1	D	3	JU258	mean.TOF	198.230769230769
558	NA	NA	NA	NA	mechlorethamine300	DMSO	1	D	3	JU258	median.EXT	378
559	NA	NA	NA	NA	mechlorethamine300	DMSO	1	D	3	JU258	median.norm.EXT	2.00469483568075
560	NA	NA	NA	NA	mechlorethamine300	DMSO	1	D	3	JU258	median.TOF	183
561	NA	NA	NA	NA	mechlorethamine300	DMSO	1	D	3	JU258	n	91
562	NA	NA	NA	NA	mechlorethamine300	DMSO	1	D	3	JU258	norm.n	91
563	NA	NA	NA	NA	mechlorethamine300	DMSO	1	D	3	JU258	q10.EXT	132
564	NA	NA	NA	NA	mechlorethamine300	DMSO	1	D	3	JU258	q10.norm.EXT	1.38578680203046
565	NA	NA	NA	NA	mechlorethamine300	DMSO	1	D	3	JU258	q10.TOF	78
566	NA	NA	NA	NA	mechlorethamine300	DMSO	1	D	3	JU258	q25.EXT	227.5
567	NA	NA	NA	NA	mechlorethamine300	DMSO	1	D	3	JU258	q25.norm.EXT	1.62885824866957
568	NA	NA	NA	NA	mechlorethamine300	DMSO	1	D	3	JU258	q25.TOF	119
569	NA	NA	NA	NA	mechlorethamine300	DMSO	1	D	3	JU258	q75.EXT	578
570	NA	NA	NA	NA	mechlorethamine300	DMSO	1	D	3	JU258	q75.norm.EXT	2.78090350614324
571	NA	NA	NA	NA	mechlorethamine300	DMSO	1	D	3	JU258	q75.TOF	244
572	NA	NA	NA	NA	mechlorethamine300	DMSO	1	D	3	JU258	q90.EXT	791
573	NA	NA	NA	NA	mechlorethamine300	DMSO	1	D	3	JU258	q90.norm.EXT	3.51136363636364
574	NA	NA	NA	NA	mechlorethamine300	DMSO	1	D	3	JU258	q90.TOF	303
575	NA	NA	NA	NA	mechlorethamine300	DMSO	1	D	3	JU258	var.EXT	456907.204639805
576	NA	NA	NA	NA	mechlorethamine300	DMSO	1	D	3	JU258	var.TOF	18290.3794871795
577	NA	NA	NA	NA	mechlorethamine400	DMSO	1	D	4	JU258	cv.EXT	1.03565676732147
578	NA	NA	NA	NA	mechlorethamine400	DMSO	1	D	4	JU258	cv.TOF	0.604148146506836
579	NA	NA	NA	NA	mechlorethamine400	DMSO	1	D	4	JU258	mean.EXT	348.010101010101
580	NA	NA	NA	NA	mechlorethamine400	DMSO	1	D	4	JU258	mean.norm.EXT	2.0627489476437
581	NA	NA	NA	NA	mechlorethamine400	DMSO	1	D	4	JU258	mean.TOF	157.121212121212
582	NA	NA	NA	NA	mechlorethamine400	DMSO	1	D	4	JU258	median.EXT	302
583	NA	NA	NA	NA	mechlorethamine400	DMSO	1	D	4	JU258	median.norm.EXT	1.77272727272727
584	NA	NA	NA	NA	mechlorethamine400	DMSO	1	D	4	JU258	median.TOF	142
585	NA	NA	NA	NA	mechlorethamine400	DMSO	1	D	4	JU258	n	99
586	NA	NA	NA	NA	mechlorethamine400	DMSO	1	D	4	JU258	norm.n	99
587	NA	NA	NA	NA	mechlorethamine400	DMSO	1	D	4	JU258	q10.EXT	107.4
588	NA	NA	NA	NA	mechlorethamine400	DMSO	1	D	4	JU258	q10.norm.EXT	1.23428571428571
589	NA	NA	NA	NA	mechlorethamine400	DMSO	1	D	4	JU258	q10.TOF	68.8
590	NA	NA	NA	NA	mechlorethamine400	DMSO	1	D	4	JU258	q25.EXT	149.5
591	NA	NA	NA	NA	mechlorethamine400	DMSO	1	D	4	JU258	q25.norm.EXT	1.51438035648562
592	NA	NA	NA	NA	mechlorethamine400	DMSO	1	D	4	JU258	q25.TOF	90
593	NA	NA	NA	NA	mechlorethamine400	DMSO	1	D	4	JU258	q75.EXT	418.5
594	NA	NA	NA	NA	mechlorethamine400	DMSO	1	D	4	JU258	q75.norm.EXT	2.46212533049989
595	NA	NA	NA	NA	mechlorethamine400	DMSO	1	D	4	JU258	q75.TOF	192.5
596	NA	NA	NA	NA	mechlorethamine400	DMSO	1	D	4	JU258	q90.EXT	523.8
597	NA	NA	NA	NA	mechlorethamine400	DMSO	1	D	4	JU258	q90.norm.EXT	3.12790165809034
598	NA	NA	NA	NA	mechlorethamine400	DMSO	1	D	4	JU258	q90.TOF	244.4
599	NA	NA	NA	NA	mechlorethamine400	DMSO	1	D	4	JU258	var.EXT	129901.867243867
600	NA	NA	NA	NA	mechlorethamine400	DMSO	1	D	4	JU258	var.TOF	9010.6586270872
601	NA	NA	NA	NA	mechlorethamine200	DMSO	1	D	8	CB4856	cv.EXT	0.984935957735865
602	NA	NA	NA	NA	mechlorethamine200	DMSO	1	D	8	CB4856	cv.TOF	0.896319985356104
603	NA	NA	NA	NA	mechlorethamine200	DMSO	1	D	8	CB4856	mean.EXT	511.285714285714
604	NA	NA	NA	NA	mechlorethamine200	DMSO	1	D	8	CB4856	mean.norm.EXT	2.23257986776259
605	NA	NA	NA	NA	mechlorethamine200	DMSO	1	D	8	CB4856	mean.TOF	205.142857142857
606	NA	NA	NA	NA	mechlorethamine200	DMSO	1	D	8	CB4856	median.EXT	298.5
607	NA	NA	NA	NA	mechlorethamine200	DMSO	1	D	8	CB4856	median.norm.EXT	1.92825667234526
608	NA	NA	NA	NA	mechlorethamine200	DMSO	1	D	8	CB4856	median.TOF	171.5
609	NA	NA	NA	NA	mechlorethamine200	DMSO	1	D	8	CB4856	n	14
610	NA	NA	NA	NA	mechlorethamine200	DMSO	1	D	8	CB4856	norm.n	14
611	NA	NA	NA	NA	mechlorethamine200	DMSO	1	D	8	CB4856	q10.EXT	73.9
612	NA	NA	NA	NA	mechlorethamine200	DMSO	1	D	8	CB4856	q10.norm.EXT	1.06742424242424
613	NA	NA	NA	NA	mechlorethamine200	DMSO	1	D	8	CB4856	q10.TOF	68.7
614	NA	NA	NA	NA	mechlorethamine200	DMSO	1	D	8	CB4856	q25.EXT	111.5
615	NA	NA	NA	NA	mechlorethamine200	DMSO	1	D	8	CB4856	q25.norm.EXT	1.26953346568349
616	NA	NA	NA	NA	mechlorethamine200	DMSO	1	D	8	CB4856	q25.TOF	82
617	NA	NA	NA	NA	mechlorethamine200	DMSO	1	D	8	CB4856	q75.EXT	787
618	NA	NA	NA	NA	mechlorethamine200	DMSO	1	D	8	CB4856	q75.norm.EXT	2.93200855462484
619	NA	NA	NA	NA	mechlorethamine200	DMSO	1	D	8	CB4856	q75.TOF	187.75
620	NA	NA	NA	NA	mechlorethamine200	DMSO	1	D	8	CB4856	q90.EXT	1104.9
621	NA	NA	NA	NA	mechlorethamine200	DMSO	1	D	8	CB4856	q90.norm.EXT	4.13258057036865
622	NA	NA	NA	NA	mechlorethamine200	DMSO	1	D	8	CB4856	q90.TOF	479
623	NA	NA	NA	NA	mechlorethamine200	DMSO	1	D	8	CB4856	var.EXT	253596.527472528
624	NA	NA	NA	NA	mechlorethamine200	DMSO	1	D	8	CB4856	var.TOF	33809.5164835165
625	NA	NA	NA	NA	water	NA	1	E	1	JU258	cv.EXT	0.756905901809333
626	NA	NA	NA	NA	water	NA	1	E	1	JU258	cv.TOF	0.54577062631797
627	NA	NA	NA	NA	water	NA	1	E	1	JU258	mean.EXT	793.598214285714
628	NA	NA	NA	NA	water	NA	1	E	1	JU258	mean.norm.EXT	2.97904641286068
629	NA	NA	NA	NA	water	NA	1	E	1	JU258	mean.TOF	248.419642857143
630	NA	NA	NA	NA	water	NA	1	E	1	JU258	median.EXT	760.5
631	NA	NA	NA	NA	water	NA	1	E	1	JU258	median.norm.EXT	2.87935587997946
632	NA	NA	NA	NA	water	NA	1	E	1	JU258	median.TOF	233
633	NA	NA	NA	NA	water	NA	1	E	1	JU258	n	112
634	NA	NA	NA	NA	water	NA	1	E	1	JU258	norm.n	112
635	NA	NA	NA	NA	water	NA	1	E	1	JU258	q10.EXT	118.7
636	NA	NA	NA	NA	water	NA	1	E	1	JU258	q10.norm.EXT	1.27946224256293
637	NA	NA	NA	NA	water	NA	1	E	1	JU258	q10.TOF	84
638	NA	NA	NA	NA	water	NA	1	E	1	JU258	q25.EXT	305
639	NA	NA	NA	NA	water	NA	1	E	1	JU258	q25.norm.EXT	2.105244739789
640	NA	NA	NA	NA	water	NA	1	E	1	JU258	q25.TOF	135.5
641	NA	NA	NA	NA	water	NA	1	E	1	JU258	q75.EXT	1132.25
642	NA	NA	NA	NA	water	NA	1	E	1	JU258	q75.norm.EXT	3.70147058823529
643	NA	NA	NA	NA	water	NA	1	E	1	JU258	q75.TOF	354.25
644	NA	NA	NA	NA	water	NA	1	E	1	JU258	q90.EXT	1536.1
645	NA	NA	NA	NA	water	NA	1	E	1	JU258	q90.norm.EXT	4.85341173054588
646	NA	NA	NA	NA	water	NA	1	E	1	JU258	q90.TOF	435.8
647	NA	NA	NA	NA	water	NA	1	E	1	JU258	var.EXT	360815.46774453
648	NA	NA	NA	NA	water	NA	1	E	1	JU258	var.TOF	18381.975466538
649	NA	NA	NA	NA	mechlorethamine300	DMSO	1	E	3	JU258	cv.EXT	1.1482739807671
650	NA	NA	NA	NA	mechlorethamine300	DMSO	1	E	3	JU258	cv.TOF	0.568178739142768
651	NA	NA	NA	NA	mechlorethamine300	DMSO	1	E	3	JU258	mean.EXT	407.718614718615
652	NA	NA	NA	NA	mechlorethamine300	DMSO	1	E	3	JU258	mean.norm.EXT	2.18498710225544
653	NA	NA	NA	NA	mechlorethamine300	DMSO	1	E	3	JU258	mean.TOF	173.350649350649
654	NA	NA	NA	NA	mechlorethamine300	DMSO	1	E	3	JU258	median.EXT	335
655	NA	NA	NA	NA	mechlorethamine300	DMSO	1	E	3	JU258	median.norm.EXT	1.98672566371681
656	NA	NA	NA	NA	mechlorethamine300	DMSO	1	E	3	JU258	median.TOF	156
657	NA	NA	NA	NA	mechlorethamine300	DMSO	1	E	3	JU258	n	231
658	NA	NA	NA	NA	mechlorethamine300	DMSO	1	E	3	JU258	norm.n	77
659	NA	NA	NA	NA	mechlorethamine300	DMSO	1	E	3	JU258	q10.EXT	117
660	NA	NA	NA	NA	mechlorethamine300	DMSO	1	E	3	JU258	q10.norm.EXT	1.26708074534161
661	NA	NA	NA	NA	mechlorethamine300	DMSO	1	E	3	JU258	q10.TOF	77
662	NA	NA	NA	NA	mechlorethamine300	DMSO	1	E	3	JU258	q25.EXT	196
663	NA	NA	NA	NA	mechlorethamine300	DMSO	1	E	3	JU258	q25.norm.EXT	1.54126116384317
664	NA	NA	NA	NA	mechlorethamine300	DMSO	1	E	3	JU258	q25.TOF	103
665	NA	NA	NA	NA	mechlorethamine300	DMSO	1	E	3	JU258	q75.EXT	482
666	NA	NA	NA	NA	mechlorethamine300	DMSO	1	E	3	JU258	q75.norm.EXT	2.63010437051533
667	NA	NA	NA	NA	mechlorethamine300	DMSO	1	E	3	JU258	q75.TOF	224.5
668	NA	NA	NA	NA	mechlorethamine300	DMSO	1	E	3	JU258	q90.EXT	706
669	NA	NA	NA	NA	mechlorethamine300	DMSO	1	E	3	JU258	q90.norm.EXT	3.33333333333333
670	NA	NA	NA	NA	mechlorethamine300	DMSO	1	E	3	JU258	q90.TOF	286
671	NA	NA	NA	NA	mechlorethamine300	DMSO	1	E	3	JU258	var.EXT	219185.655260681
672	NA	NA	NA	NA	mechlorethamine300	DMSO	1	E	3	JU258	var.TOF	9701.0982495765
673	NA	NA	NA	NA	mechlorethamine400	DMSO	1	E	4	JU258	cv.EXT	1.2186924027185
674	NA	NA	NA	NA	mechlorethamine400	DMSO	1	E	4	JU258	cv.TOF	0.624381838566653
675	NA	NA	NA	NA	mechlorethamine400	DMSO	1	E	4	JU258	mean.EXT	366.550561797753
676	NA	NA	NA	NA	mechlorethamine400	DMSO	1	E	4	JU258	mean.norm.EXT	2.21109742898495
677	NA	NA	NA	NA	mechlorethamine400	DMSO	1	E	4	JU258	mean.TOF	147.573033707865
678	NA	NA	NA	NA	mechlorethamine400	DMSO	1	E	4	JU258	median.EXT	269
679	NA	NA	NA	NA	mechlorethamine400	DMSO	1	E	4	JU258	median.norm.EXT	1.90588235294118
680	NA	NA	NA	NA	mechlorethamine400	DMSO	1	E	4	JU258	median.TOF	121
681	NA	NA	NA	NA	mechlorethamine400	DMSO	1	E	4	JU258	n	89
682	NA	NA	NA	NA	mechlorethamine400	DMSO	1	E	4	JU258	norm.n	44.5
683	NA	NA	NA	NA	mechlorethamine400	DMSO	1	E	4	JU258	q10.EXT	95.8
684	NA	NA	NA	NA	mechlorethamine400	DMSO	1	E	4	JU258	q10.norm.EXT	1.27570332480818
685	NA	NA	NA	NA	mechlorethamine400	DMSO	1	E	4	JU258	q10.TOF	68
686	NA	NA	NA	NA	mechlorethamine400	DMSO	1	E	4	JU258	q25.EXT	150
687	NA	NA	NA	NA	mechlorethamine400	DMSO	1	E	4	JU258	q25.norm.EXT	1.48924731182796
688	NA	NA	NA	NA	mechlorethamine400	DMSO	1	E	4	JU258	q25.TOF	80
689	NA	NA	NA	NA	mechlorethamine400	DMSO	1	E	4	JU258	q75.EXT	399
690	NA	NA	NA	NA	mechlorethamine400	DMSO	1	E	4	JU258	q75.norm.EXT	2.59821428571429
691	NA	NA	NA	NA	mechlorethamine400	DMSO	1	E	4	JU258	q75.TOF	191
692	NA	NA	NA	NA	mechlorethamine400	DMSO	1	E	4	JU258	q90.EXT	572.4
693	NA	NA	NA	NA	mechlorethamine400	DMSO	1	E	4	JU258	q90.norm.EXT	3.59106092684074
694	NA	NA	NA	NA	mechlorethamine400	DMSO	1	E	4	JU258	q90.TOF	241
695	NA	NA	NA	NA	mechlorethamine400	DMSO	1	E	4	JU258	var.EXT	199551.954800817
696	NA	NA	NA	NA	mechlorethamine400	DMSO	1	E	4	JU258	var.TOF	8490.13381001021
697	NA	NA	NA	NA	water	NA	1	E	7	DL238	cv.EXT	0.944296266964344
698	NA	NA	NA	NA	water	NA	1	E	7	DL238	cv.TOF	0.569197572194873
699	NA	NA	NA	NA	water	NA	1	E	7	DL238	mean.EXT	897.415254237288
700	NA	NA	NA	NA	water	NA	1	E	7	DL238	mean.norm.EXT	2.79568534806796
701	NA	NA	NA	NA	water	NA	1	E	7	DL238	mean.TOF	280.970338983051
702	NA	NA	NA	NA	water	NA	1	E	7	DL238	median.EXT	649
703	NA	NA	NA	NA	water	NA	1	E	7	DL238	median.norm.EXT	2.42978192327903
704	NA	NA	NA	NA	water	NA	1	E	7	DL238	median.TOF	254.5
705	NA	NA	NA	NA	water	NA	1	E	7	DL238	n	472
706	NA	NA	NA	NA	water	NA	1	E	7	DL238	norm.n	157.333333333333
707	NA	NA	NA	NA	water	NA	1	E	7	DL238	q10.EXT	184.1
708	NA	NA	NA	NA	water	NA	1	E	7	DL238	q10.norm.EXT	1.45940711462451
709	NA	NA	NA	NA	water	NA	1	E	7	DL238	q10.TOF	94
710	NA	NA	NA	NA	water	NA	1	E	7	DL238	q25.EXT	301
711	NA	NA	NA	NA	water	NA	1	E	7	DL238	q25.norm.EXT	1.85639286164856
712	NA	NA	NA	NA	water	NA	1	E	7	DL238	q25.TOF	160.75
713	NA	NA	NA	NA	water	NA	1	E	7	DL238	q75.EXT	1164
714	NA	NA	NA	NA	water	NA	1	E	7	DL238	q75.norm.EXT	3.63578947368421
715	NA	NA	NA	NA	water	NA	1	E	7	DL238	q75.TOF	363
716	NA	NA	NA	NA	water	NA	1	E	7	DL238	q90.EXT	2178.8
717	NA	NA	NA	NA	water	NA	1	E	7	DL238	q90.norm.EXT	4.63480780964002
718	NA	NA	NA	NA	water	NA	1	E	7	DL238	q90.TOF	517.5
719	NA	NA	NA	NA	water	NA	1	E	7	DL238	var.EXT	718130.612760444
720	NA	NA	NA	NA	water	NA	1	E	7	DL238	var.TOF	25576.8483752564
721	NA	NA	NA	NA	mechlorethamine200	DMSO	1	E	8	DL238	cv.EXT	1.05390856380543
722	NA	NA	NA	NA	mechlorethamine200	DMSO	1	E	8	DL238	cv.TOF	0.628336656508301
723	NA	NA	NA	NA	mechlorethamine200	DMSO	1	E	8	DL238	mean.EXT	822.185101580135
724	NA	NA	NA	NA	mechlorethamine200	DMSO	1	E	8	DL238	mean.norm.EXT	2.69411218618653
725	NA	NA	NA	NA	mechlorethamine200	DMSO	1	E	8	DL238	mean.TOF	263.273137697517
726	NA	NA	NA	NA	mechlorethamine200	DMSO	1	E	8	DL238	median.EXT	578
727	NA	NA	NA	NA	mechlorethamine200	DMSO	1	E	8	DL238	median.norm.EXT	2.30817610062893
728	NA	NA	NA	NA	mechlorethamine200	DMSO	1	E	8	DL238	median.TOF	225
729	NA	NA	NA	NA	mechlorethamine200	DMSO	1	E	8	DL238	n	443
730	NA	NA	NA	NA	mechlorethamine200	DMSO	1	E	8	DL238	norm.n	147.666666666667
731	NA	NA	NA	NA	mechlorethamine200	DMSO	1	E	8	DL238	q10.EXT	145.2
732	NA	NA	NA	NA	mechlorethamine200	DMSO	1	E	8	DL238	q10.norm.EXT	1.3722250903459
733	NA	NA	NA	NA	mechlorethamine200	DMSO	1	E	8	DL238	q10.TOF	90.2
734	NA	NA	NA	NA	mechlorethamine200	DMSO	1	E	8	DL238	q25.EXT	264
735	NA	NA	NA	NA	mechlorethamine200	DMSO	1	E	8	DL238	q25.norm.EXT	1.76221955128205
736	NA	NA	NA	NA	mechlorethamine200	DMSO	1	E	8	DL238	q25.TOF	139
737	NA	NA	NA	NA	mechlorethamine200	DMSO	1	E	8	DL238	q75.EXT	814
738	NA	NA	NA	NA	mechlorethamine200	DMSO	1	E	8	DL238	q75.norm.EXT	3.43130952380952
739	NA	NA	NA	NA	mechlorethamine200	DMSO	1	E	8	DL238	q75.TOF	326.5
740	NA	NA	NA	NA	mechlorethamine200	DMSO	1	E	8	DL238	q90.EXT	1885.2
741	NA	NA	NA	NA	mechlorethamine200	DMSO	1	E	8	DL238	q90.norm.EXT	4.59408114558473
742	NA	NA	NA	NA	mechlorethamine200	DMSO	1	E	8	DL238	q90.TOF	511.4
743	NA	NA	NA	NA	mechlorethamine200	DMSO	1	E	8	DL238	var.EXT	750835.974709661
744	NA	NA	NA	NA	mechlorethamine200	DMSO	1	E	8	DL238	var.TOF	27365.1537337977
745	NA	NA	NA	NA	mechlorethamine300	DMSO	1	E	9	DL238	cv.EXT	1.1599150434555
746	NA	NA	NA	NA	mechlorethamine300	DMSO	1	E	9	DL238	cv.TOF	0.668494593034504
747	NA	NA	NA	NA	mechlorethamine300	DMSO	1	E	9	DL238	mean.EXT	584.288461538462
748	NA	NA	NA	NA	mechlorethamine300	DMSO	1	E	9	DL238	mean.norm.EXT	2.43855955185723
749	NA	NA	NA	NA	mechlorethamine300	DMSO	1	E	9	DL238	mean.TOF	207.346153846154
750	NA	NA	NA	NA	mechlorethamine300	DMSO	1	E	9	DL238	median.EXT	397
751	NA	NA	NA	NA	mechlorethamine300	DMSO	1	E	9	DL238	median.norm.EXT	2.15088627588628
752	NA	NA	NA	NA	mechlorethamine300	DMSO	1	E	9	DL238	median.TOF	166.5
753	NA	NA	NA	NA	mechlorethamine300	DMSO	1	E	9	DL238	n	208
754	NA	NA	NA	NA	mechlorethamine300	DMSO	1	E	9	DL238	norm.n	69.3333333333333
755	NA	NA	NA	NA	mechlorethamine300	DMSO	1	E	9	DL238	q10.EXT	114
756	NA	NA	NA	NA	mechlorethamine300	DMSO	1	E	9	DL238	q10.norm.EXT	1.21293546021269
757	NA	NA	NA	NA	mechlorethamine300	DMSO	1	E	9	DL238	q10.TOF	79.4
758	NA	NA	NA	NA	mechlorethamine300	DMSO	1	E	9	DL238	q25.EXT	166
759	NA	NA	NA	NA	mechlorethamine300	DMSO	1	E	9	DL238	q25.norm.EXT	1.57810113694213
760	NA	NA	NA	NA	mechlorethamine300	DMSO	1	E	9	DL238	q25.TOF	108.75
761	NA	NA	NA	NA	mechlorethamine300	DMSO	1	E	9	DL238	q75.EXT	725
762	NA	NA	NA	NA	mechlorethamine300	DMSO	1	E	9	DL238	q75.norm.EXT	3.09586466165414
763	NA	NA	NA	NA	mechlorethamine300	DMSO	1	E	9	DL238	q75.TOF	266.25
764	NA	NA	NA	NA	mechlorethamine300	DMSO	1	E	9	DL238	q90.EXT	1165.7
765	NA	NA	NA	NA	mechlorethamine300	DMSO	1	E	9	DL238	q90.norm.EXT	4.01832209737828
766	NA	NA	NA	NA	mechlorethamine300	DMSO	1	E	9	DL238	q90.TOF	379.6
767	NA	NA	NA	NA	mechlorethamine300	DMSO	1	E	9	DL238	var.EXT	459311.1434411
768	NA	NA	NA	NA	mechlorethamine300	DMSO	1	E	9	DL238	var.TOF	19212.6718691936
769	NA	NA	NA	NA	mechlorethamine400	DMSO	1	E	10	DL238	cv.EXT	1.1078960850655
770	NA	NA	NA	NA	mechlorethamine400	DMSO	1	E	10	DL238	cv.TOF	0.625458503526453
771	NA	NA	NA	NA	mechlorethamine400	DMSO	1	E	10	DL238	mean.EXT	463.298969072165
772	NA	NA	NA	NA	mechlorethamine400	DMSO	1	E	10	DL238	mean.norm.EXT	2.35587110800636
773	NA	NA	NA	NA	mechlorethamine400	DMSO	1	E	10	DL238	mean.TOF	175.788659793814
774	NA	NA	NA	NA	mechlorethamine400	DMSO	1	E	10	DL238	median.EXT	301
775	NA	NA	NA	NA	mechlorethamine400	DMSO	1	E	10	DL238	median.norm.EXT	1.96739549219804
776	NA	NA	NA	NA	mechlorethamine400	DMSO	1	E	10	DL238	median.TOF	152
777	NA	NA	NA	NA	mechlorethamine400	DMSO	1	E	10	DL238	n	194
778	NA	NA	NA	NA	mechlorethamine400	DMSO	1	E	10	DL238	norm.n	64.6666666666667
779	NA	NA	NA	NA	mechlorethamine400	DMSO	1	E	10	DL238	q10.EXT	113.2
780	NA	NA	NA	NA	mechlorethamine400	DMSO	1	E	10	DL238	q10.norm.EXT	1.25189960856551
781	NA	NA	NA	NA	mechlorethamine400	DMSO	1	E	10	DL238	q10.TOF	75.3
782	NA	NA	NA	NA	mechlorethamine400	DMSO	1	E	10	DL238	q25.EXT	166
783	NA	NA	NA	NA	mechlorethamine400	DMSO	1	E	10	DL238	q25.norm.EXT	1.50192307692308
784	NA	NA	NA	NA	mechlorethamine400	DMSO	1	E	10	DL238	q25.TOF	98.25
785	NA	NA	NA	NA	mechlorethamine400	DMSO	1	E	10	DL238	q75.EXT	561
786	NA	NA	NA	NA	mechlorethamine400	DMSO	1	E	10	DL238	q75.norm.EXT	2.81667210121299
787	NA	NA	NA	NA	mechlorethamine400	DMSO	1	E	10	DL238	q75.TOF	216.5
788	NA	NA	NA	NA	mechlorethamine400	DMSO	1	E	10	DL238	q90.EXT	960.300000000001
789	NA	NA	NA	NA	mechlorethamine400	DMSO	1	E	10	DL238	q90.norm.EXT	4.03964838255978
790	NA	NA	NA	NA	mechlorethamine400	DMSO	1	E	10	DL238	q90.TOF	301.9
791	NA	NA	NA	NA	mechlorethamine400	DMSO	1	E	10	DL238	var.EXT	263463.661449709
792	NA	NA	NA	NA	mechlorethamine400	DMSO	1	E	10	DL238	var.TOF	12088.6753111479
793	NA	NA	NA	NA	mechlorethamine500	DMSO	1	E	11	DL238	cv.EXT	0.68340308082775
794	NA	NA	NA	NA	mechlorethamine500	DMSO	1	E	11	DL238	cv.TOF	0.544898596003734
795	NA	NA	NA	NA	mechlorethamine500	DMSO	1	E	11	DL238	mean.EXT	544.6
796	NA	NA	NA	NA	mechlorethamine500	DMSO	1	E	11	DL238	mean.norm.EXT	2.43699025485554
797	NA	NA	NA	NA	mechlorethamine500	DMSO	1	E	11	DL238	mean.TOF	222.2
798	NA	NA	NA	NA	mechlorethamine500	DMSO	1	E	11	DL238	median.EXT	443.5
799	NA	NA	NA	NA	mechlorethamine500	DMSO	1	E	11	DL238	median.norm.EXT	2.21816199376947
800	NA	NA	NA	NA	mechlorethamine500	DMSO	1	E	11	DL238	median.TOF	174
801	NA	NA	NA	NA	mechlorethamine500	DMSO	1	E	11	DL238	n	10
802	NA	NA	NA	NA	mechlorethamine500	DMSO	1	E	11	DL238	norm.n	3.33333333333333
803	NA	NA	NA	NA	mechlorethamine500	DMSO	1	E	11	DL238	q10.EXT	219
804	NA	NA	NA	NA	mechlorethamine500	DMSO	1	E	11	DL238	q10.norm.EXT	1.55568181818182
805	NA	NA	NA	NA	mechlorethamine500	DMSO	1	E	11	DL238	q10.TOF	95.2
806	NA	NA	NA	NA	mechlorethamine500	DMSO	1	E	11	DL238	q25.EXT	245.5
807	NA	NA	NA	NA	mechlorethamine500	DMSO	1	E	11	DL238	q25.norm.EXT	1.65973502304147
808	NA	NA	NA	NA	mechlorethamine500	DMSO	1	E	11	DL238	q25.TOF	142.5
809	NA	NA	NA	NA	mechlorethamine500	DMSO	1	E	11	DL238	q75.EXT	776.5
810	NA	NA	NA	NA	mechlorethamine500	DMSO	1	E	11	DL238	q75.norm.EXT	3.05675319704611
811	NA	NA	NA	NA	mechlorethamine500	DMSO	1	E	11	DL238	q75.TOF	340.5
812	NA	NA	NA	NA	mechlorethamine500	DMSO	1	E	11	DL238	q90.EXT	1064.5
813	NA	NA	NA	NA	mechlorethamine500	DMSO	1	E	11	DL238	q90.norm.EXT	3.71552379048381
814	NA	NA	NA	NA	mechlorethamine500	DMSO	1	E	11	DL238	q90.TOF	373.2
815	NA	NA	NA	NA	mechlorethamine500	DMSO	1	E	11	DL238	var.EXT	138518.933333333
816	NA	NA	NA	NA	mechlorethamine500	DMSO	1	E	11	DL238	var.TOF	14659.5111111111
817	NA	NA	NA	NA	water	NA	1	F	1	CB4856	cv.EXT	0.856352768697215
818	NA	NA	NA	NA	water	NA	1	F	1	CB4856	cv.TOF	0.550903402386853
819	NA	NA	NA	NA	water	NA	1	F	1	CB4856	mean.EXT	967.208
820	NA	NA	NA	NA	water	NA	1	F	1	CB4856	mean.norm.EXT	2.88749115053004
821	NA	NA	NA	NA	water	NA	1	F	1	CB4856	mean.TOF	294.109333333333
822	NA	NA	NA	NA	water	NA	1	F	1	CB4856	median.EXT	727
823	NA	NA	NA	NA	water	NA	1	F	1	CB4856	median.norm.EXT	2.63723150357995
824	NA	NA	NA	NA	water	NA	1	F	1	CB4856	median.TOF	267
825	NA	NA	NA	NA	water	NA	1	F	1	CB4856	n	375
826	NA	NA	NA	NA	water	NA	1	F	1	CB4856	norm.n	125
827	NA	NA	NA	NA	water	NA	1	F	1	CB4856	q10.EXT	162.6
828	NA	NA	NA	NA	water	NA	1	F	1	CB4856	q10.norm.EXT	1.4607225353414
829	NA	NA	NA	NA	water	NA	1	F	1	CB4856	q10.TOF	97.4
830	NA	NA	NA	NA	water	NA	1	F	1	CB4856	q25.EXT	330
831	NA	NA	NA	NA	water	NA	1	F	1	CB4856	q25.norm.EXT	1.85871895832521
832	NA	NA	NA	NA	water	NA	1	F	1	CB4856	q25.TOF	169
833	NA	NA	NA	NA	water	NA	1	F	1	CB4856	q75.EXT	1375.5
834	NA	NA	NA	NA	water	NA	1	F	1	CB4856	q75.norm.EXT	3.67948360370905
835	NA	NA	NA	NA	water	NA	1	F	1	CB4856	q75.TOF	407
836	NA	NA	NA	NA	water	NA	1	F	1	CB4856	q90.EXT	2117.8
837	NA	NA	NA	NA	water	NA	1	F	1	CB4856	q90.norm.EXT	4.72055830183193
838	NA	NA	NA	NA	water	NA	1	F	1	CB4856	q90.TOF	519.8
839	NA	NA	NA	NA	water	NA	1	F	1	CB4856	var.EXT	686033.261433155
840	NA	NA	NA	NA	water	NA	1	F	1	CB4856	var.TOF	26252.3703672014
841	NA	NA	NA	NA	mechlorethamine300	DMSO	1	F	3	CB4856	cv.EXT	1.17362226659522
842	NA	NA	NA	NA	mechlorethamine300	DMSO	1	F	3	CB4856	cv.TOF	0.561226385174253
843	NA	NA	NA	NA	mechlorethamine300	DMSO	1	F	3	CB4856	mean.EXT	467.970338983051
844	NA	NA	NA	NA	mechlorethamine300	DMSO	1	F	3	CB4856	mean.norm.EXT	2.11505593120564
845	NA	NA	NA	NA	mechlorethamine300	DMSO	1	F	3	CB4856	mean.TOF	200.885593220339
846	NA	NA	NA	NA	mechlorethamine300	DMSO	1	F	3	CB4856	median.EXT	342.5
847	NA	NA	NA	NA	mechlorethamine300	DMSO	1	F	3	CB4856	median.norm.EXT	1.85401798458464
848	NA	NA	NA	NA	mechlorethamine300	DMSO	1	F	3	CB4856	median.TOF	178
849	NA	NA	NA	NA	mechlorethamine300	DMSO	1	F	3	CB4856	n	236
850	NA	NA	NA	NA	mechlorethamine300	DMSO	1	F	3	CB4856	norm.n	78.6666666666667
851	NA	NA	NA	NA	mechlorethamine300	DMSO	1	F	3	CB4856	q10.EXT	144
852	NA	NA	NA	NA	mechlorethamine300	DMSO	1	F	3	CB4856	q10.norm.EXT	1.29205882352941
853	NA	NA	NA	NA	mechlorethamine300	DMSO	1	F	3	CB4856	q10.TOF	92.5
854	NA	NA	NA	NA	mechlorethamine300	DMSO	1	F	3	CB4856	q25.EXT	210.25
855	NA	NA	NA	NA	mechlorethamine300	DMSO	1	F	3	CB4856	q25.norm.EXT	1.46996245306633
856	NA	NA	NA	NA	mechlorethamine300	DMSO	1	F	3	CB4856	q25.TOF	126
857	NA	NA	NA	NA	mechlorethamine300	DMSO	1	F	3	CB4856	q75.EXT	541.25
858	NA	NA	NA	NA	mechlorethamine300	DMSO	1	F	3	CB4856	q75.norm.EXT	2.42083691465317
859	NA	NA	NA	NA	mechlorethamine300	DMSO	1	F	3	CB4856	q75.TOF	248.25
860	NA	NA	NA	NA	mechlorethamine300	DMSO	1	F	3	CB4856	q90.EXT	794
861	NA	NA	NA	NA	mechlorethamine300	DMSO	1	F	3	CB4856	q90.norm.EXT	3.24558699915943
862	NA	NA	NA	NA	mechlorethamine300	DMSO	1	F	3	CB4856	q90.TOF	333.5
863	NA	NA	NA	NA	mechlorethamine300	DMSO	1	F	3	CB4856	var.EXT	301643.058690948
864	NA	NA	NA	NA	mechlorethamine300	DMSO	1	F	3	CB4856	var.TOF	12710.8251532636
865	NA	NA	NA	NA	mechlorethamine400	DMSO	1	F	4	CB4856	cv.EXT	1.11649555795198
866	NA	NA	NA	NA	mechlorethamine400	DMSO	1	F	4	CB4856	cv.TOF	0.6536151170247
867	NA	NA	NA	NA	mechlorethamine400	DMSO	1	F	4	CB4856	mean.EXT	412.348684210526
868	NA	NA	NA	NA	mechlorethamine400	DMSO	1	F	4	CB4856	mean.norm.EXT	2.37124869723286
869	NA	NA	NA	NA	mechlorethamine400	DMSO	1	F	4	CB4856	mean.TOF	164.453947368421
870	NA	NA	NA	NA	mechlorethamine400	DMSO	1	F	4	CB4856	median.EXT	277
871	NA	NA	NA	NA	mechlorethamine400	DMSO	1	F	4	CB4856	median.norm.EXT	2.02141863238802
872	NA	NA	NA	NA	mechlorethamine400	DMSO	1	F	4	CB4856	median.TOF	138
873	NA	NA	NA	NA	mechlorethamine400	DMSO	1	F	4	CB4856	n	152
874	NA	NA	NA	NA	mechlorethamine400	DMSO	1	F	4	CB4856	norm.n	50.6666666666667
875	NA	NA	NA	NA	mechlorethamine400	DMSO	1	F	4	CB4856	q10.EXT	117.3
876	NA	NA	NA	NA	mechlorethamine400	DMSO	1	F	4	CB4856	q10.norm.EXT	1.2473026840287
877	NA	NA	NA	NA	mechlorethamine400	DMSO	1	F	4	CB4856	q10.TOF	65.2
878	NA	NA	NA	NA	mechlorethamine400	DMSO	1	F	4	CB4856	q25.EXT	158.5
879	NA	NA	NA	NA	mechlorethamine400	DMSO	1	F	4	CB4856	q25.norm.EXT	1.44586396509473
880	NA	NA	NA	NA	mechlorethamine400	DMSO	1	F	4	CB4856	q25.TOF	89.5
881	NA	NA	NA	NA	mechlorethamine400	DMSO	1	F	4	CB4856	q75.EXT	548.25
882	NA	NA	NA	NA	mechlorethamine400	DMSO	1	F	4	CB4856	q75.norm.EXT	3.23322368421053
883	NA	NA	NA	NA	mechlorethamine400	DMSO	1	F	4	CB4856	q75.TOF	207.25
884	NA	NA	NA	NA	mechlorethamine400	DMSO	1	F	4	CB4856	q90.EXT	699.8
885	NA	NA	NA	NA	mechlorethamine400	DMSO	1	F	4	CB4856	q90.norm.EXT	4.00711110170209
886	NA	NA	NA	NA	mechlorethamine400	DMSO	1	F	4	CB4856	q90.TOF	298.1
887	NA	NA	NA	NA	mechlorethamine400	DMSO	1	F	4	CB4856	var.EXT	211954.784898919
888	NA	NA	NA	NA	mechlorethamine400	DMSO	1	F	4	CB4856	var.TOF	11554.0111101429
889	NA	NA	NA	NA	mechlorethamine500	DMSO	1	F	5	CB4856	cv.EXT	0.895809769878224
890	NA	NA	NA	NA	mechlorethamine500	DMSO	1	F	5	CB4856	cv.TOF	0.670372282979733
891	NA	NA	NA	NA	mechlorethamine500	DMSO	1	F	5	CB4856	mean.EXT	445.976744186047
892	NA	NA	NA	NA	mechlorethamine500	DMSO	1	F	5	CB4856	mean.norm.EXT	2.78905747923804
893	NA	NA	NA	NA	mechlorethamine500	DMSO	1	F	5	CB4856	mean.TOF	151.976744186047
894	NA	NA	NA	NA	mechlorethamine500	DMSO	1	F	5	CB4856	median.EXT	331
895	NA	NA	NA	NA	mechlorethamine500	DMSO	1	F	5	CB4856	median.norm.EXT	2.35526315789474
896	NA	NA	NA	NA	mechlorethamine500	DMSO	1	F	5	CB4856	median.TOF	118
897	NA	NA	NA	NA	mechlorethamine500	DMSO	1	F	5	CB4856	n	43
898	NA	NA	NA	NA	mechlorethamine500	DMSO	1	F	5	CB4856	norm.n	43
899	NA	NA	NA	NA	mechlorethamine500	DMSO	1	F	5	CB4856	q10.EXT	110.4
900	NA	NA	NA	NA	mechlorethamine500	DMSO	1	F	5	CB4856	q10.norm.EXT	1.4646793134598
901	NA	NA	NA	NA	mechlorethamine500	DMSO	1	F	5	CB4856	q10.TOF	65.4
902	NA	NA	NA	NA	mechlorethamine500	DMSO	1	F	5	CB4856	q25.EXT	157
903	NA	NA	NA	NA	mechlorethamine500	DMSO	1	F	5	CB4856	q25.norm.EXT	1.78978413654618
904	NA	NA	NA	NA	mechlorethamine500	DMSO	1	F	5	CB4856	q25.TOF	75.5
905	NA	NA	NA	NA	mechlorethamine500	DMSO	1	F	5	CB4856	q75.EXT	565
906	NA	NA	NA	NA	mechlorethamine500	DMSO	1	F	5	CB4856	q75.norm.EXT	3.41305158020274
907	NA	NA	NA	NA	mechlorethamine500	DMSO	1	F	5	CB4856	q75.TOF	187
908	NA	NA	NA	NA	mechlorethamine500	DMSO	1	F	5	CB4856	q90.EXT	1159.2
909	NA	NA	NA	NA	mechlorethamine500	DMSO	1	F	5	CB4856	q90.norm.EXT	5.30702093397746
910	NA	NA	NA	NA	mechlorethamine500	DMSO	1	F	5	CB4856	q90.TOF	288
911	NA	NA	NA	NA	mechlorethamine500	DMSO	1	F	5	CB4856	var.EXT	159608.49944629
912	NA	NA	NA	NA	mechlorethamine500	DMSO	1	F	5	CB4856	var.TOF	10379.7375415282
913	NA	NA	NA	NA	water	NA	1	F	7	N2	cv.EXT	0.989704143972378
914	NA	NA	NA	NA	water	NA	1	F	7	N2	cv.TOF	0.622822890643448
915	NA	NA	NA	NA	water	NA	1	F	7	N2	mean.EXT	855.002427184466
916	NA	NA	NA	NA	water	NA	1	F	7	N2	mean.norm.EXT	2.72297259564349
917	NA	NA	NA	NA	water	NA	1	F	7	N2	mean.TOF	268.135922330097
918	NA	NA	NA	NA	water	NA	1	F	7	N2	median.EXT	611
919	NA	NA	NA	NA	water	NA	1	F	7	N2	median.norm.EXT	2.43690204047075
920	NA	NA	NA	NA	water	NA	1	F	7	N2	median.TOF	233
921	NA	NA	NA	NA	water	NA	1	F	7	N2	n	412
922	NA	NA	NA	NA	water	NA	1	F	7	N2	norm.n	137.333333333333
923	NA	NA	NA	NA	water	NA	1	F	7	N2	q10.EXT	122.2
924	NA	NA	NA	NA	water	NA	1	F	7	N2	q10.norm.EXT	1.23743535138424
925	NA	NA	NA	NA	water	NA	1	F	7	N2	q10.TOF	85.1
926	NA	NA	NA	NA	water	NA	1	F	7	N2	q25.EXT	236.25
927	NA	NA	NA	NA	water	NA	1	F	7	N2	q25.norm.EXT	1.57820844099914
928	NA	NA	NA	NA	water	NA	1	F	7	N2	q25.TOF	132
929	NA	NA	NA	NA	water	NA	1	F	7	N2	q75.EXT	1271.25
930	NA	NA	NA	NA	water	NA	1	F	7	N2	q75.norm.EXT	3.53381935542941
931	NA	NA	NA	NA	water	NA	1	F	7	N2	q75.TOF	360.25
932	NA	NA	NA	NA	water	NA	1	F	7	N2	q90.EXT	1899.1
933	NA	NA	NA	NA	water	NA	1	F	7	N2	q90.norm.EXT	4.66333405079638
934	NA	NA	NA	NA	water	NA	1	F	7	N2	q90.TOF	499.8
935	NA	NA	NA	NA	water	NA	1	F	7	N2	var.EXT	716053.50121064
936	NA	NA	NA	NA	water	NA	1	F	7	N2	var.TOF	27889.3975385633
937	NA	NA	NA	NA	mechlorethamine400	DMSO	1	F	10	N2	cv.EXT	1.48694455906338
938	NA	NA	NA	NA	mechlorethamine400	DMSO	1	F	10	N2	cv.TOF	0.674732963913997
939	NA	NA	NA	NA	mechlorethamine400	DMSO	1	F	10	N2	mean.EXT	423.977777777778
940	NA	NA	NA	NA	mechlorethamine400	DMSO	1	F	10	N2	mean.norm.EXT	2.14957461623061
941	NA	NA	NA	NA	mechlorethamine400	DMSO	1	F	10	N2	mean.TOF	173.355555555556
942	NA	NA	NA	NA	mechlorethamine400	DMSO	1	F	10	N2	median.EXT	284
943	NA	NA	NA	NA	mechlorethamine400	DMSO	1	F	10	N2	median.norm.EXT	1.78571428571429
944	NA	NA	NA	NA	mechlorethamine400	DMSO	1	F	10	N2	median.TOF	143
945	NA	NA	NA	NA	mechlorethamine400	DMSO	1	F	10	N2	n	135
946	NA	NA	NA	NA	mechlorethamine400	DMSO	1	F	10	N2	norm.n	45
947	NA	NA	NA	NA	mechlorethamine400	DMSO	1	F	10	N2	q10.EXT	124
948	NA	NA	NA	NA	mechlorethamine400	DMSO	1	F	10	N2	q10.norm.EXT	1.25384804524219
949	NA	NA	NA	NA	mechlorethamine400	DMSO	1	F	10	N2	q10.TOF	78.2
950	NA	NA	NA	NA	mechlorethamine400	DMSO	1	F	10	N2	q25.EXT	171.5
951	NA	NA	NA	NA	mechlorethamine400	DMSO	1	F	10	N2	q25.norm.EXT	1.3806154851966
952	NA	NA	NA	NA	mechlorethamine400	DMSO	1	F	10	N2	q25.TOF	105.5
953	NA	NA	NA	NA	mechlorethamine400	DMSO	1	F	10	N2	q75.EXT	431
954	NA	NA	NA	NA	mechlorethamine400	DMSO	1	F	10	N2	q75.norm.EXT	2.42581509347925
955	NA	NA	NA	NA	mechlorethamine400	DMSO	1	F	10	N2	q75.TOF	214.5
956	NA	NA	NA	NA	mechlorethamine400	DMSO	1	F	10	N2	q90.EXT	673.8
957	NA	NA	NA	NA	mechlorethamine400	DMSO	1	F	10	N2	q90.norm.EXT	3.67619047619048
958	NA	NA	NA	NA	mechlorethamine400	DMSO	1	F	10	N2	q90.TOF	274.6
959	NA	NA	NA	NA	mechlorethamine400	DMSO	1	F	10	N2	var.EXT	397443.812935324
960	NA	NA	NA	NA	mechlorethamine400	DMSO	1	F	10	N2	var.TOF	13681.6786069652
961	NA	NA	NA	NA	mechlorethamine500	DMSO	1	F	11	N2	cv.EXT	1.36788788264473
962	NA	NA	NA	NA	mechlorethamine500	DMSO	1	F	11	N2	cv.TOF	0.668227148587926
963	NA	NA	NA	NA	mechlorethamine500	DMSO	1	F	11	N2	mean.EXT	356.303867403315
964	NA	NA	NA	NA	mechlorethamine500	DMSO	1	F	11	N2	mean.norm.EXT	2.30700452209003
965	NA	NA	NA	NA	mechlorethamine500	DMSO	1	F	11	N2	mean.TOF	146.39226519337
966	NA	NA	NA	NA	mechlorethamine500	DMSO	1	F	11	N2	median.EXT	259
967	NA	NA	NA	NA	mechlorethamine500	DMSO	1	F	11	N2	median.norm.EXT	1.85714285714286
968	NA	NA	NA	NA	mechlorethamine500	DMSO	1	F	11	N2	median.TOF	125
969	NA	NA	NA	NA	mechlorethamine500	DMSO	1	F	11	N2	n	181
970	NA	NA	NA	NA	mechlorethamine500	DMSO	1	F	11	N2	norm.n	60.3333333333333
971	NA	NA	NA	NA	mechlorethamine500	DMSO	1	F	11	N2	q10.EXT	114
972	NA	NA	NA	NA	mechlorethamine500	DMSO	1	F	11	N2	q10.norm.EXT	1.24731182795699
973	NA	NA	NA	NA	mechlorethamine500	DMSO	1	F	11	N2	q10.TOF	70
974	NA	NA	NA	NA	mechlorethamine500	DMSO	1	F	11	N2	q25.EXT	175
975	NA	NA	NA	NA	mechlorethamine500	DMSO	1	F	11	N2	q25.norm.EXT	1.41904761904762
976	NA	NA	NA	NA	mechlorethamine500	DMSO	1	F	11	N2	q25.TOF	85
977	NA	NA	NA	NA	mechlorethamine500	DMSO	1	F	11	N2	q75.EXT	391
978	NA	NA	NA	NA	mechlorethamine500	DMSO	1	F	11	N2	q75.norm.EXT	2.832
979	NA	NA	NA	NA	mechlorethamine500	DMSO	1	F	11	N2	q75.TOF	180
980	NA	NA	NA	NA	mechlorethamine500	DMSO	1	F	11	N2	q90.EXT	569
981	NA	NA	NA	NA	mechlorethamine500	DMSO	1	F	11	N2	q90.norm.EXT	4.14598540145985
982	NA	NA	NA	NA	mechlorethamine500	DMSO	1	F	11	N2	q90.TOF	232
983	NA	NA	NA	NA	mechlorethamine500	DMSO	1	F	11	N2	var.EXT	237542.912707182
984	NA	NA	NA	NA	mechlorethamine500	DMSO	1	F	11	N2	var.TOF	9569.39527317372
985	NA	NA	NA	NA	water	NA	1	G	1	CB4856	cv.EXT	0.814421774356208
986	NA	NA	NA	NA	water	NA	1	G	1	CB4856	cv.TOF	0.503417916605481
987	NA	NA	NA	NA	water	NA	1	G	1	CB4856	mean.EXT	849.0183299389
988	NA	NA	NA	NA	water	NA	1	G	1	CB4856	mean.norm.EXT	2.70211292095108
989	NA	NA	NA	NA	water	NA	1	G	1	CB4856	mean.TOF	282.537678207739
990	NA	NA	NA	NA	water	NA	1	G	1	CB4856	median.EXT	701
991	NA	NA	NA	NA	water	NA	1	G	1	CB4856	median.norm.EXT	2.52352941176471
992	NA	NA	NA	NA	water	NA	1	G	1	CB4856	median.TOF	271
993	NA	NA	NA	NA	water	NA	1	G	1	CB4856	n	491
994	NA	NA	NA	NA	water	NA	1	G	1	CB4856	norm.n	163.666666666667
995	NA	NA	NA	NA	water	NA	1	G	1	CB4856	q10.EXT	173
996	NA	NA	NA	NA	water	NA	1	G	1	CB4856	q10.norm.EXT	1.34210526315789
997	NA	NA	NA	NA	water	NA	1	G	1	CB4856	q10.TOF	114
998	NA	NA	NA	NA	water	NA	1	G	1	CB4856	q25.EXT	308.5
999	NA	NA	NA	NA	water	NA	1	G	1	CB4856	q25.norm.EXT	1.87203862660944
1000	NA	NA	NA	NA	water	NA	1	G	1	CB4856	q25.TOF	164.5
1001	NA	NA	NA	NA	water	NA	1	G	1	CB4856	q75.EXT	1210.5
1002	NA	NA	NA	NA	water	NA	1	G	1	CB4856	q75.norm.EXT	3.44584872642427
1003	NA	NA	NA	NA	water	NA	1	G	1	CB4856	q75.TOF	378
1004	NA	NA	NA	NA	water	NA	1	G	1	CB4856	q90.EXT	1632
1005	NA	NA	NA	NA	water	NA	1	G	1	CB4856	q90.norm.EXT	4.18058690744921
1006	NA	NA	NA	NA	water	NA	1	G	1	CB4856	q90.TOF	460
1007	NA	NA	NA	NA	water	NA	1	G	1	CB4856	var.EXT	478115.569051083
1008	NA	NA	NA	NA	water	NA	1	G	1	CB4856	var.TOF	20230.6613325575
1009	NA	NA	NA	NA	mechlorethamine200	DMSO	1	G	2	CB4856	cv.EXT	0.831778419403163
1010	NA	NA	NA	NA	mechlorethamine200	DMSO	1	G	2	CB4856	cv.TOF	0.538353177154303
1011	NA	NA	NA	NA	mechlorethamine200	DMSO	1	G	2	CB4856	mean.EXT	685.43231441048
1012	NA	NA	NA	NA	mechlorethamine200	DMSO	1	G	2	CB4856	mean.norm.EXT	2.60679118033469
1013	NA	NA	NA	NA	mechlorethamine200	DMSO	1	G	2	CB4856	mean.TOF	240.873362445415
1014	NA	NA	NA	NA	mechlorethamine200	DMSO	1	G	2	CB4856	median.EXT	562.5
1015	NA	NA	NA	NA	mechlorethamine200	DMSO	1	G	2	CB4856	median.norm.EXT	2.40498935443699
1016	NA	NA	NA	NA	mechlorethamine200	DMSO	1	G	2	CB4856	median.TOF	215.5
1017	NA	NA	NA	NA	mechlorethamine200	DMSO	1	G	2	CB4856	n	458
1018	NA	NA	NA	NA	mechlorethamine200	DMSO	1	G	2	CB4856	norm.n	152.666666666667
1019	NA	NA	NA	NA	mechlorethamine200	DMSO	1	G	2	CB4856	q10.EXT	158.7
1020	NA	NA	NA	NA	mechlorethamine200	DMSO	1	G	2	CB4856	q10.norm.EXT	1.34228230785608
1021	NA	NA	NA	NA	mechlorethamine200	DMSO	1	G	2	CB4856	q10.TOF	92
1022	NA	NA	NA	NA	mechlorethamine200	DMSO	1	G	2	CB4856	q25.EXT	273
1023	NA	NA	NA	NA	mechlorethamine200	DMSO	1	G	2	CB4856	q25.norm.EXT	1.7648569023569
1024	NA	NA	NA	NA	mechlorethamine200	DMSO	1	G	2	CB4856	q25.TOF	142
1025	NA	NA	NA	NA	mechlorethamine200	DMSO	1	G	2	CB4856	q75.EXT	882.75
1026	NA	NA	NA	NA	mechlorethamine200	DMSO	1	G	2	CB4856	q75.norm.EXT	3.33558505639098
1027	NA	NA	NA	NA	mechlorethamine200	DMSO	1	G	2	CB4856	q75.TOF	319.5
1028	NA	NA	NA	NA	mechlorethamine200	DMSO	1	G	2	CB4856	q90.EXT	1417
1029	NA	NA	NA	NA	mechlorethamine200	DMSO	1	G	2	CB4856	q90.norm.EXT	4.16983863670638
1030	NA	NA	NA	NA	mechlorethamine200	DMSO	1	G	2	CB4856	q90.TOF	407.3
1031	NA	NA	NA	NA	mechlorethamine200	DMSO	1	G	2	CB4856	var.EXT	325045.716415201
1032	NA	NA	NA	NA	mechlorethamine200	DMSO	1	G	2	CB4856	var.TOF	16815.5900547524
1033	NA	NA	NA	NA	mechlorethamine300	DMSO	1	G	3	CB4856	cv.EXT	0.862499606232593
1034	NA	NA	NA	NA	mechlorethamine300	DMSO	1	G	3	CB4856	cv.TOF	0.559372417050225
1035	NA	NA	NA	NA	mechlorethamine300	DMSO	1	G	3	CB4856	mean.EXT	427.194444444444
1036	NA	NA	NA	NA	mechlorethamine300	DMSO	1	G	3	CB4856	mean.norm.EXT	2.30645335225439
1037	NA	NA	NA	NA	mechlorethamine300	DMSO	1	G	3	CB4856	mean.TOF	180.236111111111
1038	NA	NA	NA	NA	mechlorethamine300	DMSO	1	G	3	CB4856	median.EXT	314
1039	NA	NA	NA	NA	mechlorethamine300	DMSO	1	G	3	CB4856	median.norm.EXT	2.03840037236725
1040	NA	NA	NA	NA	mechlorethamine300	DMSO	1	G	3	CB4856	median.TOF	174
1041	NA	NA	NA	NA	mechlorethamine300	DMSO	1	G	3	CB4856	n	72
1042	NA	NA	NA	NA	mechlorethamine300	DMSO	1	G	3	CB4856	norm.n	72
1043	NA	NA	NA	NA	mechlorethamine300	DMSO	1	G	3	CB4856	q10.EXT	120.6
1044	NA	NA	NA	NA	mechlorethamine300	DMSO	1	G	3	CB4856	q10.norm.EXT	1.26591836734694
1045	NA	NA	NA	NA	mechlorethamine300	DMSO	1	G	3	CB4856	q10.TOF	81
1046	NA	NA	NA	NA	mechlorethamine300	DMSO	1	G	3	CB4856	q25.EXT	219.5
1047	NA	NA	NA	NA	mechlorethamine300	DMSO	1	G	3	CB4856	q25.norm.EXT	1.52103448275862
1048	NA	NA	NA	NA	mechlorethamine300	DMSO	1	G	3	CB4856	q25.TOF	104
1049	NA	NA	NA	NA	mechlorethamine300	DMSO	1	G	3	CB4856	q75.EXT	504.5
1050	NA	NA	NA	NA	mechlorethamine300	DMSO	1	G	3	CB4856	q75.norm.EXT	2.81611679604799
1051	NA	NA	NA	NA	mechlorethamine300	DMSO	1	G	3	CB4856	q75.TOF	226.75
1052	NA	NA	NA	NA	mechlorethamine300	DMSO	1	G	3	CB4856	q90.EXT	762.2
1053	NA	NA	NA	NA	mechlorethamine300	DMSO	1	G	3	CB4856	q90.norm.EXT	3.68416554206028
1054	NA	NA	NA	NA	mechlorethamine300	DMSO	1	G	3	CB4856	q90.TOF	297.3
1055	NA	NA	NA	NA	mechlorethamine300	DMSO	1	G	3	CB4856	var.EXT	135759.116588419
1056	NA	NA	NA	NA	mechlorethamine300	DMSO	1	G	3	CB4856	var.TOF	10164.4927621283
1057	NA	NA	NA	NA	mechlorethamine400	DMSO	1	G	4	CB4856	cv.EXT	1.13616913342802
1058	NA	NA	NA	NA	mechlorethamine400	DMSO	1	G	4	CB4856	cv.TOF	0.641749603230786
1059	NA	NA	NA	NA	mechlorethamine400	DMSO	1	G	4	CB4856	mean.EXT	409.183431952663
1060	NA	NA	NA	NA	mechlorethamine400	DMSO	1	G	4	CB4856	mean.norm.EXT	2.22221832317895
1061	NA	NA	NA	NA	mechlorethamine400	DMSO	1	G	4	CB4856	mean.TOF	173.171597633136
1062	NA	NA	NA	NA	mechlorethamine400	DMSO	1	G	4	CB4856	median.EXT	300
1063	NA	NA	NA	NA	mechlorethamine400	DMSO	1	G	4	CB4856	median.norm.EXT	1.95180722891566
1064	NA	NA	NA	NA	mechlorethamine400	DMSO	1	G	4	CB4856	median.TOF	148
1065	NA	NA	NA	NA	mechlorethamine400	DMSO	1	G	4	CB4856	n	169
1066	NA	NA	NA	NA	mechlorethamine400	DMSO	1	G	4	CB4856	norm.n	56.3333333333333
1067	NA	NA	NA	NA	mechlorethamine400	DMSO	1	G	4	CB4856	q10.EXT	122.6
1068	NA	NA	NA	NA	mechlorethamine400	DMSO	1	G	4	CB4856	q10.norm.EXT	1.21313242009132
1069	NA	NA	NA	NA	mechlorethamine400	DMSO	1	G	4	CB4856	q10.TOF	70
1070	NA	NA	NA	NA	mechlorethamine400	DMSO	1	G	4	CB4856	q25.EXT	169
1071	NA	NA	NA	NA	mechlorethamine400	DMSO	1	G	4	CB4856	q25.norm.EXT	1.46448087431694
1072	NA	NA	NA	NA	mechlorethamine400	DMSO	1	G	4	CB4856	q25.TOF	97
1073	NA	NA	NA	NA	mechlorethamine400	DMSO	1	G	4	CB4856	q75.EXT	484
1074	NA	NA	NA	NA	mechlorethamine400	DMSO	1	G	4	CB4856	q75.norm.EXT	2.73058252427184
1075	NA	NA	NA	NA	mechlorethamine400	DMSO	1	G	4	CB4856	q75.TOF	221
1076	NA	NA	NA	NA	mechlorethamine400	DMSO	1	G	4	CB4856	q90.EXT	712
1077	NA	NA	NA	NA	mechlorethamine400	DMSO	1	G	4	CB4856	q90.norm.EXT	3.75080987907736
1078	NA	NA	NA	NA	mechlorethamine400	DMSO	1	G	4	CB4856	q90.TOF	287.4
1079	NA	NA	NA	NA	mechlorethamine400	DMSO	1	G	4	CB4856	var.EXT	216133.48400958
1080	NA	NA	NA	NA	mechlorethamine400	DMSO	1	G	4	CB4856	var.TOF	12350.5001408847
1081	NA	NA	NA	NA	water	NA	1	G	7	JU258	cv.EXT	0.735804236797972
1082	NA	NA	NA	NA	water	NA	1	G	7	JU258	cv.TOF	0.500838701614011
1083	NA	NA	NA	NA	water	NA	1	G	7	JU258	mean.EXT	878.877300613497
1084	NA	NA	NA	NA	water	NA	1	G	7	JU258	mean.norm.EXT	2.99362464390625
1085	NA	NA	NA	NA	water	NA	1	G	7	JU258	mean.TOF	271.993865030675
1086	NA	NA	NA	NA	water	NA	1	G	7	JU258	median.EXT	734
1087	NA	NA	NA	NA	water	NA	1	G	7	JU258	median.norm.EXT	2.82539682539683
1088	NA	NA	NA	NA	water	NA	1	G	7	JU258	median.TOF	269
1089	NA	NA	NA	NA	water	NA	1	G	7	JU258	n	163
1090	NA	NA	NA	NA	water	NA	1	G	7	JU258	norm.n	163
1091	NA	NA	NA	NA	water	NA	1	G	7	JU258	q10.EXT	171.4
1092	NA	NA	NA	NA	water	NA	1	G	7	JU258	q10.norm.EXT	1.58120879120879
1093	NA	NA	NA	NA	water	NA	1	G	7	JU258	q10.TOF	84.8
1094	NA	NA	NA	NA	water	NA	1	G	7	JU258	q25.EXT	415.5
1095	NA	NA	NA	NA	water	NA	1	G	7	JU258	q25.norm.EXT	2.16037066595726
1096	NA	NA	NA	NA	water	NA	1	G	7	JU258	q25.TOF	160
1097	NA	NA	NA	NA	water	NA	1	G	7	JU258	q75.EXT	1271.5
1098	NA	NA	NA	NA	water	NA	1	G	7	JU258	q75.norm.EXT	3.7087003441638
1099	NA	NA	NA	NA	water	NA	1	G	7	JU258	q75.TOF	368
1100	NA	NA	NA	NA	water	NA	1	G	7	JU258	q90.EXT	1579.8
1101	NA	NA	NA	NA	water	NA	1	G	7	JU258	q90.norm.EXT	4.63164772675494
1102	NA	NA	NA	NA	water	NA	1	G	7	JU258	q90.TOF	440.6
1103	NA	NA	NA	NA	water	NA	1	G	7	JU258	var.EXT	418197.145345755
1104	NA	NA	NA	NA	water	NA	1	G	7	JU258	var.TOF	18557.2653942286
1105	NA	NA	NA	NA	mechlorethamine200	DMSO	1	G	8	JU258	cv.EXT	0.788573337320967
1106	NA	NA	NA	NA	mechlorethamine200	DMSO	1	G	8	JU258	cv.TOF	0.520641306379724
1107	NA	NA	NA	NA	mechlorethamine200	DMSO	1	G	8	JU258	mean.EXT	586.772151898734
1108	NA	NA	NA	NA	mechlorethamine200	DMSO	1	G	8	JU258	mean.norm.EXT	2.54670178666066
1109	NA	NA	NA	NA	mechlorethamine200	DMSO	1	G	8	JU258	mean.TOF	214.341772151899
1110	NA	NA	NA	NA	mechlorethamine200	DMSO	1	G	8	JU258	median.EXT	423
1111	NA	NA	NA	NA	mechlorethamine200	DMSO	1	G	8	JU258	median.norm.EXT	2.4025974025974
1112	NA	NA	NA	NA	mechlorethamine200	DMSO	1	G	8	JU258	median.TOF	191
1113	NA	NA	NA	NA	mechlorethamine200	DMSO	1	G	8	JU258	n	79
1114	NA	NA	NA	NA	mechlorethamine200	DMSO	1	G	8	JU258	norm.n	39.5
1115	NA	NA	NA	NA	mechlorethamine200	DMSO	1	G	8	JU258	q10.EXT	136.2
1116	NA	NA	NA	NA	mechlorethamine200	DMSO	1	G	8	JU258	q10.norm.EXT	1.27591713125473
1117	NA	NA	NA	NA	mechlorethamine200	DMSO	1	G	8	JU258	q10.TOF	81.6
1118	NA	NA	NA	NA	mechlorethamine200	DMSO	1	G	8	JU258	q25.EXT	264
1119	NA	NA	NA	NA	mechlorethamine200	DMSO	1	G	8	JU258	q25.norm.EXT	1.5802816091954
1120	NA	NA	NA	NA	mechlorethamine200	DMSO	1	G	8	JU258	q25.TOF	136.5
1121	NA	NA	NA	NA	mechlorethamine200	DMSO	1	G	8	JU258	q75.EXT	772.5
1122	NA	NA	NA	NA	mechlorethamine200	DMSO	1	G	8	JU258	q75.norm.EXT	3.24272030651341
1123	NA	NA	NA	NA	mechlorethamine200	DMSO	1	G	8	JU258	q75.TOF	286
1124	NA	NA	NA	NA	mechlorethamine200	DMSO	1	G	8	JU258	q90.EXT	1261.8
1125	NA	NA	NA	NA	mechlorethamine200	DMSO	1	G	8	JU258	q90.norm.EXT	4.17306088407006
1126	NA	NA	NA	NA	mechlorethamine200	DMSO	1	G	8	JU258	q90.TOF	367.8
1127	NA	NA	NA	NA	mechlorethamine200	DMSO	1	G	8	JU258	var.EXT	214103.203829925
1128	NA	NA	NA	NA	mechlorethamine200	DMSO	1	G	8	JU258	var.TOF	12453.4842583577
1129	NA	NA	NA	NA	mechlorethamine300	DMSO	1	G	9	JU258	cv.EXT	1.24560878824944
1130	NA	NA	NA	NA	mechlorethamine300	DMSO	1	G	9	JU258	cv.TOF	0.541634622445638
1131	NA	NA	NA	NA	mechlorethamine300	DMSO	1	G	9	JU258	mean.EXT	425.148387096774
1132	NA	NA	NA	NA	mechlorethamine300	DMSO	1	G	9	JU258	mean.norm.EXT	2.16039968811269
1133	NA	NA	NA	NA	mechlorethamine300	DMSO	1	G	9	JU258	mean.TOF	176.948387096774
1134	NA	NA	NA	NA	mechlorethamine300	DMSO	1	G	9	JU258	median.EXT	337
1135	NA	NA	NA	NA	mechlorethamine300	DMSO	1	G	9	JU258	median.norm.EXT	1.8169014084507
1136	NA	NA	NA	NA	mechlorethamine300	DMSO	1	G	9	JU258	median.TOF	161
1137	NA	NA	NA	NA	mechlorethamine300	DMSO	1	G	9	JU258	n	155
1138	NA	NA	NA	NA	mechlorethamine300	DMSO	1	G	9	JU258	norm.n	51.6666666666667
1139	NA	NA	NA	NA	mechlorethamine300	DMSO	1	G	9	JU258	q10.EXT	119.8
1140	NA	NA	NA	NA	mechlorethamine300	DMSO	1	G	9	JU258	q10.norm.EXT	1.23695652173913
1141	NA	NA	NA	NA	mechlorethamine300	DMSO	1	G	9	JU258	q10.TOF	84.4
1142	NA	NA	NA	NA	mechlorethamine300	DMSO	1	G	9	JU258	q25.EXT	186
1143	NA	NA	NA	NA	mechlorethamine300	DMSO	1	G	9	JU258	q25.norm.EXT	1.45615763546798
1144	NA	NA	NA	NA	mechlorethamine300	DMSO	1	G	9	JU258	q25.TOF	109.5
1145	NA	NA	NA	NA	mechlorethamine300	DMSO	1	G	9	JU258	q75.EXT	493
1146	NA	NA	NA	NA	mechlorethamine300	DMSO	1	G	9	JU258	q75.norm.EXT	2.55989407889812
1147	NA	NA	NA	NA	mechlorethamine300	DMSO	1	G	9	JU258	q75.TOF	225.5
1148	NA	NA	NA	NA	mechlorethamine300	DMSO	1	G	9	JU258	q90.EXT	649.4
1149	NA	NA	NA	NA	mechlorethamine300	DMSO	1	G	9	JU258	q90.norm.EXT	3.41036763574835
1150	NA	NA	NA	NA	mechlorethamine300	DMSO	1	G	9	JU258	q90.TOF	275.4
1151	NA	NA	NA	NA	mechlorethamine300	DMSO	1	G	9	JU258	var.EXT	280442.86744868
1152	NA	NA	NA	NA	mechlorethamine300	DMSO	1	G	9	JU258	var.TOF	9185.56874738165
1153	NA	NA	NA	NA	mechlorethamine400	DMSO	1	G	10	JU258	cv.EXT	1.23185799532474
1154	NA	NA	NA	NA	mechlorethamine400	DMSO	1	G	10	JU258	cv.TOF	0.73496243678873
1155	NA	NA	NA	NA	mechlorethamine400	DMSO	1	G	10	JU258	mean.EXT	373.231884057971
1156	NA	NA	NA	NA	mechlorethamine400	DMSO	1	G	10	JU258	mean.norm.EXT	2.1882139328597
1157	NA	NA	NA	NA	mechlorethamine400	DMSO	1	G	10	JU258	mean.TOF	152.855072463768
1158	NA	NA	NA	NA	mechlorethamine400	DMSO	1	G	10	JU258	median.EXT	208
1159	NA	NA	NA	NA	mechlorethamine400	DMSO	1	G	10	JU258	median.norm.EXT	1.68663594470046
1160	NA	NA	NA	NA	mechlorethamine400	DMSO	1	G	10	JU258	median.TOF	119
1161	NA	NA	NA	NA	mechlorethamine400	DMSO	1	G	10	JU258	n	69
1162	NA	NA	NA	NA	mechlorethamine400	DMSO	1	G	10	JU258	norm.n	23
1163	NA	NA	NA	NA	mechlorethamine400	DMSO	1	G	10	JU258	q10.EXT	97
1164	NA	NA	NA	NA	mechlorethamine400	DMSO	1	G	10	JU258	q10.norm.EXT	1.18902263744161
1165	NA	NA	NA	NA	mechlorethamine400	DMSO	1	G	10	JU258	q10.TOF	65.8
1166	NA	NA	NA	NA	mechlorethamine400	DMSO	1	G	10	JU258	q25.EXT	125
1167	NA	NA	NA	NA	mechlorethamine400	DMSO	1	G	10	JU258	q25.norm.EXT	1.38095238095238
1168	NA	NA	NA	NA	mechlorethamine400	DMSO	1	G	10	JU258	q25.TOF	75
1169	NA	NA	NA	NA	mechlorethamine400	DMSO	1	G	10	JU258	q75.EXT	416
1170	NA	NA	NA	NA	mechlorethamine400	DMSO	1	G	10	JU258	q75.norm.EXT	2.65384615384615
1171	NA	NA	NA	NA	mechlorethamine400	DMSO	1	G	10	JU258	q75.TOF	182
1172	NA	NA	NA	NA	mechlorethamine400	DMSO	1	G	10	JU258	q90.EXT	650.6
1173	NA	NA	NA	NA	mechlorethamine400	DMSO	1	G	10	JU258	q90.norm.EXT	4.03329890518488
1174	NA	NA	NA	NA	mechlorethamine400	DMSO	1	G	10	JU258	q90.TOF	281
1175	NA	NA	NA	NA	mechlorethamine400	DMSO	1	G	10	JU258	var.EXT	211387.239556692
1176	NA	NA	NA	NA	mechlorethamine400	DMSO	1	G	10	JU258	var.TOF	12620.8904518329
1177	NA	NA	NA	NA	mechlorethamine500	DMSO	1	G	11	JU258	cv.EXT	1.21949819206616
1178	NA	NA	NA	NA	mechlorethamine500	DMSO	1	G	11	JU258	cv.TOF	0.737457260314819
1179	NA	NA	NA	NA	mechlorethamine500	DMSO	1	G	11	JU258	mean.EXT	440.910447761194
1180	NA	NA	NA	NA	mechlorethamine500	DMSO	1	G	11	JU258	mean.norm.EXT	2.32269776349318
1181	NA	NA	NA	NA	mechlorethamine500	DMSO	1	G	11	JU258	mean.TOF	163.283582089552
1182	NA	NA	NA	NA	mechlorethamine500	DMSO	1	G	11	JU258	median.EXT	238
1183	NA	NA	NA	NA	mechlorethamine500	DMSO	1	G	11	JU258	median.norm.EXT	1.92039800995025
1184	NA	NA	NA	NA	mechlorethamine500	DMSO	1	G	11	JU258	median.TOF	115
1185	NA	NA	NA	NA	mechlorethamine500	DMSO	1	G	11	JU258	n	67
1186	NA	NA	NA	NA	mechlorethamine500	DMSO	1	G	11	JU258	norm.n	22.3333333333333
1187	NA	NA	NA	NA	mechlorethamine500	DMSO	1	G	11	JU258	q10.EXT	102.4
1188	NA	NA	NA	NA	mechlorethamine500	DMSO	1	G	11	JU258	q10.norm.EXT	1.23558176100629
1189	NA	NA	NA	NA	mechlorethamine500	DMSO	1	G	11	JU258	q10.TOF	68.6
1190	NA	NA	NA	NA	mechlorethamine500	DMSO	1	G	11	JU258	q25.EXT	132.5
1191	NA	NA	NA	NA	mechlorethamine500	DMSO	1	G	11	JU258	q25.norm.EXT	1.38776326312983
1192	NA	NA	NA	NA	mechlorethamine500	DMSO	1	G	11	JU258	q25.TOF	80
1193	NA	NA	NA	NA	mechlorethamine500	DMSO	1	G	11	JU258	q75.EXT	471.5
1194	NA	NA	NA	NA	mechlorethamine500	DMSO	1	G	11	JU258	q75.norm.EXT	3.04460784313726
1195	NA	NA	NA	NA	mechlorethamine500	DMSO	1	G	11	JU258	q75.TOF	202.5
1196	NA	NA	NA	NA	mechlorethamine500	DMSO	1	G	11	JU258	q90.EXT	1029.2
1197	NA	NA	NA	NA	mechlorethamine500	DMSO	1	G	11	JU258	q90.norm.EXT	4.4098131104963
1198	NA	NA	NA	NA	mechlorethamine500	DMSO	1	G	11	JU258	q90.TOF	339
1199	NA	NA	NA	NA	mechlorethamine500	DMSO	1	G	11	JU258	var.EXT	289109.991858887
1200	NA	NA	NA	NA	mechlorethamine500	DMSO	1	G	11	JU258	var.TOF	14499.6910900045
1201	NA	NA	NA	NA	water	NA	1	H	1	N2	cv.EXT	0.936185980626756
1202	NA	NA	NA	NA	water	NA	1	H	1	N2	cv.TOF	0.607568521818086
1203	NA	NA	NA	NA	water	NA	1	H	1	N2	mean.EXT	867.228215767635
1204	NA	NA	NA	NA	water	NA	1	H	1	N2	mean.norm.EXT	2.8019523100092
1205	NA	NA	NA	NA	water	NA	1	H	1	N2	mean.TOF	269.109958506224
1206	NA	NA	NA	NA	water	NA	1	H	1	N2	median.EXT	616.5
1207	NA	NA	NA	NA	water	NA	1	H	1	N2	median.norm.EXT	2.5437037037037
1208	NA	NA	NA	NA	water	NA	1	H	1	N2	median.TOF	236.5
1209	NA	NA	NA	NA	water	NA	1	H	1	N2	n	482
1210	NA	NA	NA	NA	water	NA	1	H	1	N2	norm.n	160.666666666667
1211	NA	NA	NA	NA	water	NA	1	H	1	N2	q10.EXT	138.3
1212	NA	NA	NA	NA	water	NA	1	H	1	N2	q10.norm.EXT	1.30344414495358
1213	NA	NA	NA	NA	water	NA	1	H	1	N2	q10.TOF	87.2
1214	NA	NA	NA	NA	water	NA	1	H	1	N2	q25.EXT	265
1215	NA	NA	NA	NA	water	NA	1	H	1	N2	q25.norm.EXT	1.67647546419098
1216	NA	NA	NA	NA	water	NA	1	H	1	N2	q25.TOF	138
1217	NA	NA	NA	NA	water	NA	1	H	1	N2	q75.EXT	1295.5
1218	NA	NA	NA	NA	water	NA	1	H	1	N2	q75.norm.EXT	3.6885551948052
1219	NA	NA	NA	NA	water	NA	1	H	1	N2	q75.TOF	361.5
1220	NA	NA	NA	NA	water	NA	1	H	1	N2	q90.EXT	2042.3
1221	NA	NA	NA	NA	water	NA	1	H	1	N2	q90.norm.EXT	4.67653066071344
1222	NA	NA	NA	NA	water	NA	1	H	1	N2	q90.TOF	501.8
1223	NA	NA	NA	NA	water	NA	1	H	1	N2	var.EXT	659160.334503671
1224	NA	NA	NA	NA	water	NA	1	H	1	N2	var.TOF	26733.145888148
1225	NA	NA	NA	NA	mechlorethamine200	DMSO	1	H	2	N2	cv.EXT	0.910729153505966
1226	NA	NA	NA	NA	mechlorethamine200	DMSO	1	H	2	N2	cv.TOF	0.530322479329171
1227	NA	NA	NA	NA	mechlorethamine200	DMSO	1	H	2	N2	mean.EXT	687.324074074074
1228	NA	NA	NA	NA	mechlorethamine200	DMSO	1	H	2	N2	mean.norm.EXT	2.53135780573857
1229	NA	NA	NA	NA	mechlorethamine200	DMSO	1	H	2	N2	mean.TOF	244.444444444444
1230	NA	NA	NA	NA	mechlorethamine200	DMSO	1	H	2	N2	median.EXT	575
1231	NA	NA	NA	NA	mechlorethamine200	DMSO	1	H	2	N2	median.norm.EXT	2.29556429734129
1232	NA	NA	NA	NA	mechlorethamine200	DMSO	1	H	2	N2	median.TOF	225
1233	NA	NA	NA	NA	mechlorethamine200	DMSO	1	H	2	N2	n	432
1234	NA	NA	NA	NA	mechlorethamine200	DMSO	1	H	2	N2	norm.n	144
1235	NA	NA	NA	NA	mechlorethamine200	DMSO	1	H	2	N2	q10.EXT	147.1
1236	NA	NA	NA	NA	mechlorethamine200	DMSO	1	H	2	N2	q10.norm.EXT	1.39077818627451
1237	NA	NA	NA	NA	mechlorethamine200	DMSO	1	H	2	N2	q10.TOF	95.1
1238	NA	NA	NA	NA	mechlorethamine200	DMSO	1	H	2	N2	q25.EXT	271
1239	NA	NA	NA	NA	mechlorethamine200	DMSO	1	H	2	N2	q25.norm.EXT	1.6958041958042
1240	NA	NA	NA	NA	mechlorethamine200	DMSO	1	H	2	N2	q25.TOF	149.75
1241	NA	NA	NA	NA	mechlorethamine200	DMSO	1	H	2	N2	q75.EXT	891
1242	NA	NA	NA	NA	mechlorethamine200	DMSO	1	H	2	N2	q75.norm.EXT	3.17433355562395
1243	NA	NA	NA	NA	mechlorethamine200	DMSO	1	H	2	N2	q75.TOF	313.25
1244	NA	NA	NA	NA	mechlorethamine200	DMSO	1	H	2	N2	q90.EXT	1386.1
1245	NA	NA	NA	NA	mechlorethamine200	DMSO	1	H	2	N2	q90.norm.EXT	4.00341423045093
1246	NA	NA	NA	NA	mechlorethamine200	DMSO	1	H	2	N2	q90.TOF	396.9
1247	NA	NA	NA	NA	mechlorethamine200	DMSO	1	H	2	N2	var.EXT	391833.523502621
1248	NA	NA	NA	NA	mechlorethamine200	DMSO	1	H	2	N2	var.TOF	16805.0734725445
1249	NA	NA	NA	NA	mechlorethamine300	DMSO	1	H	3	N2	cv.EXT	1.2414026090375
1250	NA	NA	NA	NA	mechlorethamine300	DMSO	1	H	3	N2	cv.TOF	0.586734093909062
1251	NA	NA	NA	NA	mechlorethamine300	DMSO	1	H	3	N2	mean.EXT	468.214521452145
1252	NA	NA	NA	NA	mechlorethamine300	DMSO	1	H	3	N2	mean.norm.EXT	2.14895573666934
1253	NA	NA	NA	NA	mechlorethamine300	DMSO	1	H	3	N2	mean.TOF	193.808580858086
1254	NA	NA	NA	NA	mechlorethamine300	DMSO	1	H	3	N2	median.EXT	352
1255	NA	NA	NA	NA	mechlorethamine300	DMSO	1	H	3	N2	median.norm.EXT	1.88625592417062
1256	NA	NA	NA	NA	mechlorethamine300	DMSO	1	H	3	N2	median.TOF	170
1257	NA	NA	NA	NA	mechlorethamine300	DMSO	1	H	3	N2	n	303
1258	NA	NA	NA	NA	mechlorethamine300	DMSO	1	H	3	N2	norm.n	101
1259	NA	NA	NA	NA	mechlorethamine300	DMSO	1	H	3	N2	q10.EXT	112.2
1260	NA	NA	NA	NA	mechlorethamine300	DMSO	1	H	3	N2	q10.norm.EXT	1.21027568922306
1261	NA	NA	NA	NA	mechlorethamine300	DMSO	1	H	3	N2	q10.TOF	83
1262	NA	NA	NA	NA	mechlorethamine300	DMSO	1	H	3	N2	q25.EXT	188
1263	NA	NA	NA	NA	mechlorethamine300	DMSO	1	H	3	N2	q25.norm.EXT	1.42328042328042
1264	NA	NA	NA	NA	mechlorethamine300	DMSO	1	H	3	N2	q25.TOF	111.5
1265	NA	NA	NA	NA	mechlorethamine300	DMSO	1	H	3	N2	q75.EXT	579.5
1266	NA	NA	NA	NA	mechlorethamine300	DMSO	1	H	3	N2	q75.norm.EXT	2.50880887908267
1267	NA	NA	NA	NA	mechlorethamine300	DMSO	1	H	3	N2	q75.TOF	255
1268	NA	NA	NA	NA	mechlorethamine300	DMSO	1	H	3	N2	q90.EXT	824.8
1269	NA	NA	NA	NA	mechlorethamine300	DMSO	1	H	3	N2	q90.norm.EXT	3.52563887969793
1270	NA	NA	NA	NA	mechlorethamine300	DMSO	1	H	3	N2	q90.TOF	319.6
1271	NA	NA	NA	NA	mechlorethamine300	DMSO	1	H	3	N2	var.EXT	337843.109457303
1272	NA	NA	NA	NA	mechlorethamine300	DMSO	1	H	3	N2	var.TOF	12930.8970122178
1273	NA	NA	NA	NA	mechlorethamine400	DMSO	1	H	4	N2	cv.EXT	1.88882025471209
1274	NA	NA	NA	NA	mechlorethamine400	DMSO	1	H	4	N2	cv.TOF	1.0914816773768
1275	NA	NA	NA	NA	mechlorethamine400	DMSO	1	H	4	N2	mean.EXT	683.428571428571
1276	NA	NA	NA	NA	mechlorethamine400	DMSO	1	H	4	N2	mean.norm.EXT	2.92318906178452
1277	NA	NA	NA	NA	mechlorethamine400	DMSO	1	H	4	N2	mean.TOF	197.547619047619
1278	NA	NA	NA	NA	mechlorethamine400	DMSO	1	H	4	N2	median.EXT	336.5
1279	NA	NA	NA	NA	mechlorethamine400	DMSO	1	H	4	N2	median.norm.EXT	2.32267099056604
1280	NA	NA	NA	NA	mechlorethamine400	DMSO	1	H	4	N2	median.TOF	139
1281	NA	NA	NA	NA	mechlorethamine400	DMSO	1	H	4	N2	n	42
1282	NA	NA	NA	NA	mechlorethamine400	DMSO	1	H	4	N2	norm.n	14
1283	NA	NA	NA	NA	mechlorethamine400	DMSO	1	H	4	N2	q10.EXT	116.3
1284	NA	NA	NA	NA	mechlorethamine400	DMSO	1	H	4	N2	q10.norm.EXT	1.3205662212869
1285	NA	NA	NA	NA	mechlorethamine400	DMSO	1	H	4	N2	q10.TOF	64.1
1286	NA	NA	NA	NA	mechlorethamine400	DMSO	1	H	4	N2	q25.EXT	218.75
1287	NA	NA	NA	NA	mechlorethamine400	DMSO	1	H	4	N2	q25.norm.EXT	1.70155121121972
1288	NA	NA	NA	NA	mechlorethamine400	DMSO	1	H	4	N2	q25.TOF	96.5
1289	NA	NA	NA	NA	mechlorethamine400	DMSO	1	H	4	N2	q75.EXT	693.25
1290	NA	NA	NA	NA	mechlorethamine400	DMSO	1	H	4	N2	q75.norm.EXT	3.99228806907378
1291	NA	NA	NA	NA	mechlorethamine400	DMSO	1	H	4	N2	q75.TOF	208.5
1292	NA	NA	NA	NA	mechlorethamine400	DMSO	1	H	4	N2	q90.EXT	1201.6
1293	NA	NA	NA	NA	mechlorethamine400	DMSO	1	H	4	N2	q90.norm.EXT	5.57362142099682
1294	NA	NA	NA	NA	mechlorethamine400	DMSO	1	H	4	N2	q90.TOF	320.8
1295	NA	NA	NA	NA	mechlorethamine400	DMSO	1	H	4	N2	var.EXT	1666354.9825784
1296	NA	NA	NA	NA	mechlorethamine400	DMSO	1	H	4	N2	var.TOF	46491.8147502904
1297	NA	NA	NA	NA	mechlorethamine500	DMSO	1	H	5	N2	cv.EXT	1.19098635246878
1298	NA	NA	NA	NA	mechlorethamine500	DMSO	1	H	5	N2	cv.TOF	0.579769421430444
1299	NA	NA	NA	NA	mechlorethamine500	DMSO	1	H	5	N2	mean.EXT	339.935897435897
1300	NA	NA	NA	NA	mechlorethamine500	DMSO	1	H	5	N2	mean.norm.EXT	2.10854173540904
1301	NA	NA	NA	NA	mechlorethamine500	DMSO	1	H	5	N2	mean.TOF	147.128205128205
1302	NA	NA	NA	NA	mechlorethamine500	DMSO	1	H	5	N2	median.EXT	249.5
1303	NA	NA	NA	NA	mechlorethamine500	DMSO	1	H	5	N2	median.norm.EXT	1.71025718153106
1304	NA	NA	NA	NA	mechlorethamine500	DMSO	1	H	5	N2	median.TOF	123
1305	NA	NA	NA	NA	mechlorethamine500	DMSO	1	H	5	N2	n	156
1306	NA	NA	NA	NA	mechlorethamine500	DMSO	1	H	5	N2	norm.n	52
1307	NA	NA	NA	NA	mechlorethamine500	DMSO	1	H	5	N2	q10.EXT	96
1308	NA	NA	NA	NA	mechlorethamine500	DMSO	1	H	5	N2	q10.norm.EXT	1.22733798195242
1309	NA	NA	NA	NA	mechlorethamine500	DMSO	1	H	5	N2	q10.TOF	69
1310	NA	NA	NA	NA	mechlorethamine500	DMSO	1	H	5	N2	q25.EXT	128.25
1311	NA	NA	NA	NA	mechlorethamine500	DMSO	1	H	5	N2	q25.norm.EXT	1.34189640768588
1312	NA	NA	NA	NA	mechlorethamine500	DMSO	1	H	5	N2	q25.TOF	82.75
1313	NA	NA	NA	NA	mechlorethamine500	DMSO	1	H	5	N2	q75.EXT	379
1314	NA	NA	NA	NA	mechlorethamine500	DMSO	1	H	5	N2	q75.norm.EXT	2.42720818134445
1315	NA	NA	NA	NA	mechlorethamine500	DMSO	1	H	5	N2	q75.TOF	193.5
1316	NA	NA	NA	NA	mechlorethamine500	DMSO	1	H	5	N2	q90.EXT	521
1317	NA	NA	NA	NA	mechlorethamine500	DMSO	1	H	5	N2	q90.norm.EXT	3.47634434102093
1318	NA	NA	NA	NA	mechlorethamine500	DMSO	1	H	5	N2	q90.TOF	245
1319	NA	NA	NA	NA	mechlorethamine500	DMSO	1	H	5	N2	var.EXT	163910.821670802
1320	NA	NA	NA	NA	mechlorethamine500	DMSO	1	H	5	N2	var.TOF	7276.1641025641
1321	NA	NA	NA	NA	water	NA	1	H	7	DL238	cv.EXT	1.04286893981832
1322	NA	NA	NA	NA	water	NA	1	H	7	DL238	cv.TOF	0.610384943830465
1323	NA	NA	NA	NA	water	NA	1	H	7	DL238	mean.EXT	834.845890410959
1324	NA	NA	NA	NA	water	NA	1	H	7	DL238	mean.norm.EXT	2.67809691857435
1325	NA	NA	NA	NA	water	NA	1	H	7	DL238	mean.TOF	262.881849315069
1326	NA	NA	NA	NA	water	NA	1	H	7	DL238	median.EXT	577
1327	NA	NA	NA	NA	water	NA	1	H	7	DL238	median.norm.EXT	2.23262256007215
1328	NA	NA	NA	NA	water	NA	1	H	7	DL238	median.TOF	225
1329	NA	NA	NA	NA	water	NA	1	H	7	DL238	n	584
1330	NA	NA	NA	NA	water	NA	1	H	7	DL238	norm.n	194.666666666667
1331	NA	NA	NA	NA	water	NA	1	H	7	DL238	q10.EXT	123
1332	NA	NA	NA	NA	water	NA	1	H	7	DL238	q10.norm.EXT	1.29457745644186
1333	NA	NA	NA	NA	water	NA	1	H	7	DL238	q10.TOF	92
1334	NA	NA	NA	NA	water	NA	1	H	7	DL238	q25.EXT	246.75
1335	NA	NA	NA	NA	water	NA	1	H	7	DL238	q25.norm.EXT	1.64186507936508
1336	NA	NA	NA	NA	water	NA	1	H	7	DL238	q25.TOF	140
1337	NA	NA	NA	NA	water	NA	1	H	7	DL238	q75.EXT	799.25
1338	NA	NA	NA	NA	water	NA	1	H	7	DL238	q75.norm.EXT	3.50805043713089
1339	NA	NA	NA	NA	water	NA	1	H	7	DL238	q75.TOF	335
1340	NA	NA	NA	NA	water	NA	1	H	7	DL238	q90.EXT	2199.1
1341	NA	NA	NA	NA	water	NA	1	H	7	DL238	q90.norm.EXT	4.86705864149776
1342	NA	NA	NA	NA	water	NA	1	H	7	DL238	q90.TOF	515.4
1343	NA	NA	NA	NA	water	NA	1	H	7	DL238	var.EXT	758005.039674334
1344	NA	NA	NA	NA	water	NA	1	H	7	DL238	var.TOF	25747.130098804
1345	NA	NA	NA	NA	mechlorethamine200	DMSO	1	H	8	DL238	cv.EXT	1.01832811898636
1346	NA	NA	NA	NA	mechlorethamine200	DMSO	1	H	8	DL238	cv.TOF	0.580387426600209
1347	NA	NA	NA	NA	mechlorethamine200	DMSO	1	H	8	DL238	mean.EXT	695.607748184019
1348	NA	NA	NA	NA	mechlorethamine200	DMSO	1	H	8	DL238	mean.norm.EXT	2.59232995672637
1349	NA	NA	NA	NA	mechlorethamine200	DMSO	1	H	8	DL238	mean.TOF	236.365617433414
1350	NA	NA	NA	NA	mechlorethamine200	DMSO	1	H	8	DL238	median.EXT	529
1351	NA	NA	NA	NA	mechlorethamine200	DMSO	1	H	8	DL238	median.norm.EXT	2.22388059701493
1352	NA	NA	NA	NA	mechlorethamine200	DMSO	1	H	8	DL238	median.TOF	199
1353	NA	NA	NA	NA	mechlorethamine200	DMSO	1	H	8	DL238	n	413
1354	NA	NA	NA	NA	mechlorethamine200	DMSO	1	H	8	DL238	norm.n	137.666666666667
1355	NA	NA	NA	NA	mechlorethamine200	DMSO	1	H	8	DL238	q10.EXT	147.2
1356	NA	NA	NA	NA	mechlorethamine200	DMSO	1	H	8	DL238	q10.norm.EXT	1.35101425438596
1357	NA	NA	NA	NA	mechlorethamine200	DMSO	1	H	8	DL238	q10.TOF	90.2
1358	NA	NA	NA	NA	mechlorethamine200	DMSO	1	H	8	DL238	q25.EXT	231
1359	NA	NA	NA	NA	mechlorethamine200	DMSO	1	H	8	DL238	q25.norm.EXT	1.69945355191257
1360	NA	NA	NA	NA	mechlorethamine200	DMSO	1	H	8	DL238	q25.TOF	133
1361	NA	NA	NA	NA	mechlorethamine200	DMSO	1	H	8	DL238	q75.EXT	782
1362	NA	NA	NA	NA	mechlorethamine200	DMSO	1	H	8	DL238	q75.norm.EXT	3.31764705882353
1363	NA	NA	NA	NA	mechlorethamine200	DMSO	1	H	8	DL238	q75.TOF	301
1364	NA	NA	NA	NA	mechlorethamine200	DMSO	1	H	8	DL238	q90.EXT	1622
1365	NA	NA	NA	NA	mechlorethamine200	DMSO	1	H	8	DL238	q90.norm.EXT	4.14269029399919
1366	NA	NA	NA	NA	mechlorethamine200	DMSO	1	H	8	DL238	q90.TOF	432
1367	NA	NA	NA	NA	mechlorethamine200	DMSO	1	H	8	DL238	var.EXT	501769.53993982
1368	NA	NA	NA	NA	mechlorethamine200	DMSO	1	H	8	DL238	var.TOF	18819.3490091445
1369	NA	NA	NA	NA	mechlorethamine300	DMSO	1	H	9	DL238	cv.EXT	1.0457543598858
1370	NA	NA	NA	NA	mechlorethamine300	DMSO	1	H	9	DL238	cv.TOF	0.597840512888161
1371	NA	NA	NA	NA	mechlorethamine300	DMSO	1	H	9	DL238	mean.EXT	531.846743295019
1372	NA	NA	NA	NA	mechlorethamine300	DMSO	1	H	9	DL238	mean.norm.EXT	2.4532436604876
1373	NA	NA	NA	NA	mechlorethamine300	DMSO	1	H	9	DL238	mean.TOF	198.080459770115
1374	NA	NA	NA	NA	mechlorethamine300	DMSO	1	H	9	DL238	median.EXT	400
1375	NA	NA	NA	NA	mechlorethamine300	DMSO	1	H	9	DL238	median.norm.EXT	2.175
1376	NA	NA	NA	NA	mechlorethamine300	DMSO	1	H	9	DL238	median.TOF	171
1377	NA	NA	NA	NA	mechlorethamine300	DMSO	1	H	9	DL238	n	261
1378	NA	NA	NA	NA	mechlorethamine300	DMSO	1	H	9	DL238	norm.n	87
1379	NA	NA	NA	NA	mechlorethamine300	DMSO	1	H	9	DL238	q10.EXT	128
1380	NA	NA	NA	NA	mechlorethamine300	DMSO	1	H	9	DL238	q10.norm.EXT	1.26315789473684
1381	NA	NA	NA	NA	mechlorethamine300	DMSO	1	H	9	DL238	q10.TOF	78
1382	NA	NA	NA	NA	mechlorethamine300	DMSO	1	H	9	DL238	q25.EXT	212
1383	NA	NA	NA	NA	mechlorethamine300	DMSO	1	H	9	DL238	q25.norm.EXT	1.60913705583756
1384	NA	NA	NA	NA	mechlorethamine300	DMSO	1	H	9	DL238	q25.TOF	111
1385	NA	NA	NA	NA	mechlorethamine300	DMSO	1	H	9	DL238	q75.EXT	619
1386	NA	NA	NA	NA	mechlorethamine300	DMSO	1	H	9	DL238	q75.norm.EXT	3.01744186046512
1387	NA	NA	NA	NA	mechlorethamine300	DMSO	1	H	9	DL238	q75.TOF	246
1388	NA	NA	NA	NA	mechlorethamine300	DMSO	1	H	9	DL238	q90.EXT	1069
1389	NA	NA	NA	NA	mechlorethamine300	DMSO	1	H	9	DL238	q90.norm.EXT	4.03118040089087
1390	NA	NA	NA	NA	mechlorethamine300	DMSO	1	H	9	DL238	q90.TOF	357
1391	NA	NA	NA	NA	mechlorethamine300	DMSO	1	H	9	DL238	var.EXT	309337.36103743
1392	NA	NA	NA	NA	mechlorethamine300	DMSO	1	H	9	DL238	var.TOF	14023.4204244032
1393	NA	NA	NA	NA	mechlorethamine400	DMSO	1	H	10	DL238	cv.EXT	1.19767578442139
1394	NA	NA	NA	NA	mechlorethamine400	DMSO	1	H	10	DL238	cv.TOF	0.666431695755136
1395	NA	NA	NA	NA	mechlorethamine400	DMSO	1	H	10	DL238	mean.EXT	513.344262295082
1396	NA	NA	NA	NA	mechlorethamine400	DMSO	1	H	10	DL238	mean.norm.EXT	2.33765037720481
1397	NA	NA	NA	NA	mechlorethamine400	DMSO	1	H	10	DL238	mean.TOF	196.830601092896
1398	NA	NA	NA	NA	mechlorethamine400	DMSO	1	H	10	DL238	median.EXT	377
1399	NA	NA	NA	NA	mechlorethamine400	DMSO	1	H	10	DL238	median.norm.EXT	2.07394366197183
1400	NA	NA	NA	NA	mechlorethamine400	DMSO	1	H	10	DL238	median.TOF	175
1401	NA	NA	NA	NA	mechlorethamine400	DMSO	1	H	10	DL238	n	183
1402	NA	NA	NA	NA	mechlorethamine400	DMSO	1	H	10	DL238	norm.n	61
1403	NA	NA	NA	NA	mechlorethamine400	DMSO	1	H	10	DL238	q10.EXT	111.4
1404	NA	NA	NA	NA	mechlorethamine400	DMSO	1	H	10	DL238	q10.norm.EXT	1.26400299850075
1405	NA	NA	NA	NA	mechlorethamine400	DMSO	1	H	10	DL238	q10.TOF	74
1406	NA	NA	NA	NA	mechlorethamine400	DMSO	1	H	10	DL238	q25.EXT	189
1407	NA	NA	NA	NA	mechlorethamine400	DMSO	1	H	10	DL238	q25.norm.EXT	1.58925177956002
1408	NA	NA	NA	NA	mechlorethamine400	DMSO	1	H	10	DL238	q25.TOF	99
1409	NA	NA	NA	NA	mechlorethamine400	DMSO	1	H	10	DL238	q75.EXT	617.5
1410	NA	NA	NA	NA	mechlorethamine400	DMSO	1	H	10	DL238	q75.norm.EXT	2.90722596448255
1411	NA	NA	NA	NA	mechlorethamine400	DMSO	1	H	10	DL238	q75.TOF	257
1412	NA	NA	NA	NA	mechlorethamine400	DMSO	1	H	10	DL238	q90.EXT	888.8
1413	NA	NA	NA	NA	mechlorethamine400	DMSO	1	H	10	DL238	q90.norm.EXT	3.74174757281553
1414	NA	NA	NA	NA	mechlorethamine400	DMSO	1	H	10	DL238	q90.TOF	341.2
1415	NA	NA	NA	NA	mechlorethamine400	DMSO	1	H	10	DL238	var.EXT	378003.622590524
1416	NA	NA	NA	NA	mechlorethamine400	DMSO	1	H	10	DL238	var.TOF	17206.6579595268
1417	NA	NA	NA	NA	mechlorethamine500	DMSO	1	H	11	DL238	cv.EXT	1.32762626922494
1418	NA	NA	NA	NA	mechlorethamine500	DMSO	1	H	11	DL238	cv.TOF	0.707458432789273
1419	NA	NA	NA	NA	mechlorethamine500	DMSO	1	H	11	DL238	mean.EXT	401.085714285714
1420	NA	NA	NA	NA	mechlorethamine500	DMSO	1	H	11	DL238	mean.norm.EXT	2.5594641527412
1421	NA	NA	NA	NA	mechlorethamine500	DMSO	1	H	11	DL238	mean.TOF	138.152380952381
1422	NA	NA	NA	NA	mechlorethamine500	DMSO	1	H	11	DL238	median.EXT	222
1423	NA	NA	NA	NA	mechlorethamine500	DMSO	1	H	11	DL238	median.norm.EXT	2.02415458937198
1424	NA	NA	NA	NA	mechlorethamine500	DMSO	1	H	11	DL238	median.TOF	111
1425	NA	NA	NA	NA	mechlorethamine500	DMSO	1	H	11	DL238	n	105
1426	NA	NA	NA	NA	mechlorethamine500	DMSO	1	H	11	DL238	norm.n	35
1427	NA	NA	NA	NA	mechlorethamine500	DMSO	1	H	11	DL238	q10.EXT	103.8
1428	NA	NA	NA	NA	mechlorethamine500	DMSO	1	H	11	DL238	q10.norm.EXT	1.20151351351351
1429	NA	NA	NA	NA	mechlorethamine500	DMSO	1	H	11	DL238	q10.TOF	70
1430	NA	NA	NA	NA	mechlorethamine500	DMSO	1	H	11	DL238	q25.EXT	140
1431	NA	NA	NA	NA	mechlorethamine500	DMSO	1	H	11	DL238	q25.norm.EXT	1.37692307692308
1432	NA	NA	NA	NA	mechlorethamine500	DMSO	1	H	11	DL238	q25.TOF	82
1433	NA	NA	NA	NA	mechlorethamine500	DMSO	1	H	11	DL238	q75.EXT	427
1434	NA	NA	NA	NA	mechlorethamine500	DMSO	1	H	11	DL238	q75.norm.EXT	3.421875
1435	NA	NA	NA	NA	mechlorethamine500	DMSO	1	H	11	DL238	q75.TOF	161
1436	NA	NA	NA	NA	mechlorethamine500	DMSO	1	H	11	DL238	q90.EXT	665.8
1437	NA	NA	NA	NA	mechlorethamine500	DMSO	1	H	11	DL238	q90.norm.EXT	4.71191397849462
1438	NA	NA	NA	NA	mechlorethamine500	DMSO	1	H	11	DL238	q90.TOF	224.4
1439	NA	NA	NA	NA	mechlorethamine500	DMSO	1	H	11	DL238	var.EXT	283547.656043956
1440	NA	NA	NA	NA	mechlorethamine500	DMSO	1	H	11	DL238	var.TOF	9552.53424908425
1441	NA	NA	NA	NA	water	NA	2	A	1	N2	cv.EXT	1.07092155243718
1442	NA	NA	NA	NA	water	NA	2	A	1	N2	cv.TOF	0.648482569154655
1443	NA	NA	NA	NA	water	NA	2	A	1	N2	mean.EXT	768.033101045296
1444	NA	NA	NA	NA	water	NA	2	A	1	N2	mean.norm.EXT	2.57630991418353
1445	NA	NA	NA	NA	water	NA	2	A	1	N2	mean.TOF	239.066202090592
1446	NA	NA	NA	NA	water	NA	2	A	1	N2	median.EXT	462.5
1447	NA	NA	NA	NA	water	NA	2	A	1	N2	median.norm.EXT	2.080851758179
1448	NA	NA	NA	NA	water	NA	2	A	1	N2	median.TOF	189
1449	NA	NA	NA	NA	water	NA	2	A	1	N2	n	574
1450	NA	NA	NA	NA	water	NA	2	A	1	N2	norm.n	191.333333333333
1451	NA	NA	NA	NA	water	NA	2	A	1	N2	q10.EXT	113
1452	NA	NA	NA	NA	water	NA	2	A	1	N2	q10.norm.EXT	1.05243083003953
1453	NA	NA	NA	NA	water	NA	2	A	1	N2	q10.TOF	81.3
1454	NA	NA	NA	NA	water	NA	2	A	1	N2	q25.EXT	132
1455	NA	NA	NA	NA	water	NA	2	A	1	N2	q25.norm.EXT	1.27614199229499
1456	NA	NA	NA	NA	water	NA	2	A	1	N2	q25.TOF	114
1457	NA	NA	NA	NA	water	NA	2	A	1	N2	q75.EXT	1172.75
1458	NA	NA	NA	NA	water	NA	2	A	1	N2	q75.norm.EXT	3.65655458089669
1459	NA	NA	NA	NA	water	NA	2	A	1	N2	q75.TOF	337.75
1460	NA	NA	NA	NA	water	NA	2	A	1	N2	q90.EXT	2144.6
1461	NA	NA	NA	NA	water	NA	2	A	1	N2	q90.norm.EXT	4.87843085294326
1462	NA	NA	NA	NA	water	NA	2	A	1	N2	q90.TOF	476.7
1463	NA	NA	NA	NA	water	NA	2	A	1	N2	var.EXT	676511.515481816
1464	NA	NA	NA	NA	water	NA	2	A	1	N2	var.TOF	24034.3830441895
1465	NA	NA	NA	NA	diquat250	water	2	A	2	N2	cv.EXT	0.63409547149104
1466	NA	NA	NA	NA	diquat250	water	2	A	2	N2	cv.TOF	0.429378357535932
1467	NA	NA	NA	NA	diquat250	water	2	A	2	N2	mean.EXT	527.544502617801
1468	NA	NA	NA	NA	diquat250	water	2	A	2	N2	mean.norm.EXT	2.49883609281886
1469	NA	NA	NA	NA	diquat250	water	2	A	2	N2	mean.TOF	211.683246073298
1470	NA	NA	NA	NA	diquat250	water	2	A	2	N2	median.EXT	556.5
1471	NA	NA	NA	NA	diquat250	water	2	A	2	N2	median.norm.EXT	2.27791327913279
1472	NA	NA	NA	NA	diquat250	water	2	A	2	N2	median.TOF	200.5
1473	NA	NA	NA	NA	diquat250	water	2	A	2	N2	n	382
1474	NA	NA	NA	NA	diquat250	water	2	A	2	N2	norm.n	127.333333333333
1475	NA	NA	NA	NA	diquat250	water	2	A	2	N2	q10.EXT	160.3
1476	NA	NA	NA	NA	diquat250	water	2	A	2	N2	q10.norm.EXT	1.42679894812336
1477	NA	NA	NA	NA	diquat250	water	2	A	2	N2	q10.TOF	103
1478	NA	NA	NA	NA	diquat250	water	2	A	2	N2	q25.EXT	329
1479	NA	NA	NA	NA	diquat250	water	2	A	2	N2	q25.norm.EXT	1.8895258166491
1480	NA	NA	NA	NA	diquat250	water	2	A	2	N2	q25.TOF	147
1481	NA	NA	NA	NA	diquat250	water	2	A	2	N2	q75.EXT	636.75
1482	NA	NA	NA	NA	diquat250	water	2	A	2	N2	q75.norm.EXT	3.03506175197352
1483	NA	NA	NA	NA	diquat250	water	2	A	2	N2	q75.TOF	274
1484	NA	NA	NA	NA	diquat250	water	2	A	2	N2	q90.EXT	736.9
1485	NA	NA	NA	NA	diquat250	water	2	A	2	N2	q90.norm.EXT	3.71156158305303
1486	NA	NA	NA	NA	diquat250	water	2	A	2	N2	q90.TOF	321.9
1487	NA	NA	NA	NA	diquat250	water	2	A	2	N2	var.EXT	111899.33528466
1488	NA	NA	NA	NA	diquat250	water	2	A	2	N2	var.TOF	8261.39284192879
1489	NA	NA	NA	NA	diquat500	water	2	A	3	N2	cv.EXT	0.983161286549804
1490	NA	NA	NA	NA	diquat500	water	2	A	3	N2	cv.TOF	0.447901997303424
1491	NA	NA	NA	NA	diquat500	water	2	A	3	N2	mean.EXT	451.397683397683
1492	NA	NA	NA	NA	diquat500	water	2	A	3	N2	mean.norm.EXT	2.23916561377143
1493	NA	NA	NA	NA	diquat500	water	2	A	3	N2	mean.TOF	196.752895752896
1494	NA	NA	NA	NA	diquat500	water	2	A	3	N2	median.EXT	430
1495	NA	NA	NA	NA	diquat500	water	2	A	3	N2	median.norm.EXT	2.04531722054381
1496	NA	NA	NA	NA	diquat500	water	2	A	3	N2	median.TOF	186
1497	NA	NA	NA	NA	diquat500	water	2	A	3	N2	n	259
1498	NA	NA	NA	NA	diquat500	water	2	A	3	N2	norm.n	86.3333333333333
1499	NA	NA	NA	NA	diquat500	water	2	A	3	N2	q10.EXT	181.8
1500	NA	NA	NA	NA	diquat500	water	2	A	3	N2	q10.norm.EXT	1.34415525994473
1501	NA	NA	NA	NA	diquat500	water	2	A	3	N2	q10.TOF	102.8
1502	NA	NA	NA	NA	diquat500	water	2	A	3	N2	q25.EXT	269.5
1503	NA	NA	NA	NA	diquat500	water	2	A	3	N2	q25.norm.EXT	1.60805404341838
1504	NA	NA	NA	NA	diquat500	water	2	A	3	N2	q25.TOF	138
1505	NA	NA	NA	NA	diquat500	water	2	A	3	N2	q75.EXT	524
1506	NA	NA	NA	NA	diquat500	water	2	A	3	N2	q75.norm.EXT	2.72500707213579
1507	NA	NA	NA	NA	diquat500	water	2	A	3	N2	q75.TOF	245.5
1508	NA	NA	NA	NA	diquat500	water	2	A	3	N2	q90.EXT	590.2
1509	NA	NA	NA	NA	diquat500	water	2	A	3	N2	q90.norm.EXT	3.39800724637681
1510	NA	NA	NA	NA	diquat500	water	2	A	3	N2	q90.TOF	288.2
1511	NA	NA	NA	NA	diquat500	water	2	A	3	N2	var.EXT	196955.535033372
1512	NA	NA	NA	NA	diquat500	water	2	A	3	N2	var.TOF	7766.19451677591
1513	NA	NA	NA	NA	diquat1000	water	2	A	4	N2	cv.EXT	1.08156136801177
1514	NA	NA	NA	NA	diquat1000	water	2	A	4	N2	cv.TOF	0.404621706874207
1515	NA	NA	NA	NA	diquat1000	water	2	A	4	N2	mean.EXT	361.876623376623
1516	NA	NA	NA	NA	diquat1000	water	2	A	4	N2	mean.norm.EXT	1.94764403880299
1517	NA	NA	NA	NA	diquat1000	water	2	A	4	N2	mean.TOF	179.970779220779
1518	NA	NA	NA	NA	diquat1000	water	2	A	4	N2	median.EXT	320.5
1519	NA	NA	NA	NA	diquat1000	water	2	A	4	N2	median.norm.EXT	1.76259489302968
1520	NA	NA	NA	NA	diquat1000	water	2	A	4	N2	median.TOF	176
1521	NA	NA	NA	NA	diquat1000	water	2	A	4	N2	n	308
1522	NA	NA	NA	NA	diquat1000	water	2	A	4	N2	norm.n	102.666666666667
1523	NA	NA	NA	NA	diquat1000	water	2	A	4	N2	q10.EXT	174.5
1524	NA	NA	NA	NA	diquat1000	water	2	A	4	N2	q10.norm.EXT	1.27625
1525	NA	NA	NA	NA	diquat1000	water	2	A	4	N2	q10.TOF	107.7
1526	NA	NA	NA	NA	diquat1000	water	2	A	4	N2	q25.EXT	237.75
1527	NA	NA	NA	NA	diquat1000	water	2	A	4	N2	q25.norm.EXT	1.47365749398878
1528	NA	NA	NA	NA	diquat1000	water	2	A	4	N2	q25.TOF	126
1529	NA	NA	NA	NA	diquat1000	water	2	A	4	N2	q75.EXT	408
1530	NA	NA	NA	NA	diquat1000	water	2	A	4	N2	q75.norm.EXT	2.10167726790853
1531	NA	NA	NA	NA	diquat1000	water	2	A	4	N2	q75.TOF	222.25
1532	NA	NA	NA	NA	diquat1000	water	2	A	4	N2	q90.EXT	470.3
1533	NA	NA	NA	NA	diquat1000	water	2	A	4	N2	q90.norm.EXT	2.97290598290598
1534	NA	NA	NA	NA	diquat1000	water	2	A	4	N2	q90.TOF	254.6
1535	NA	NA	NA	NA	diquat1000	water	2	A	4	N2	var.EXT	153187.52218791
1536	NA	NA	NA	NA	diquat1000	water	2	A	4	N2	var.TOF	5302.76461567748
1537	NA	NA	NA	NA	diquat2000	water	2	A	5	N2	cv.EXT	0.702694142748387
1538	NA	NA	NA	NA	diquat2000	water	2	A	5	N2	cv.TOF	0.341745540118333
1539	NA	NA	NA	NA	diquat2000	water	2	A	5	N2	mean.EXT	247.528169014085
1540	NA	NA	NA	NA	diquat2000	water	2	A	5	N2	mean.norm.EXT	1.78432083052708
1541	NA	NA	NA	NA	diquat2000	water	2	A	5	N2	mean.TOF	140.225352112676
1542	NA	NA	NA	NA	diquat2000	water	2	A	5	N2	median.EXT	222
1543	NA	NA	NA	NA	diquat2000	water	2	A	5	N2	median.norm.EXT	1.52105496453901
1544	NA	NA	NA	NA	diquat2000	water	2	A	5	N2	median.TOF	142
1545	NA	NA	NA	NA	diquat2000	water	2	A	5	N2	n	142
1546	NA	NA	NA	NA	diquat2000	water	2	A	5	N2	norm.n	47.3333333333333
1547	NA	NA	NA	NA	diquat2000	water	2	A	5	N2	q10.EXT	134.3
1548	NA	NA	NA	NA	diquat2000	water	2	A	5	N2	q10.norm.EXT	1.22532411408816
1549	NA	NA	NA	NA	diquat2000	water	2	A	5	N2	q10.TOF	80
1550	NA	NA	NA	NA	diquat2000	water	2	A	5	N2	q25.EXT	185
1551	NA	NA	NA	NA	diquat2000	water	2	A	5	N2	q25.norm.EXT	1.34262533258647
1552	NA	NA	NA	NA	diquat2000	water	2	A	5	N2	q25.TOF	101.5
1553	NA	NA	NA	NA	diquat2000	water	2	A	5	N2	q75.EXT	262.25
1554	NA	NA	NA	NA	diquat2000	water	2	A	5	N2	q75.norm.EXT	2.06124323772583
1555	NA	NA	NA	NA	diquat2000	water	2	A	5	N2	q75.TOF	170
1556	NA	NA	NA	NA	diquat2000	water	2	A	5	N2	q90.EXT	346
1557	NA	NA	NA	NA	diquat2000	water	2	A	5	N2	q90.norm.EXT	2.5687
1558	NA	NA	NA	NA	diquat2000	water	2	A	5	N2	q90.TOF	192.9
1559	NA	NA	NA	NA	diquat2000	water	2	A	5	N2	var.EXT	30253.9389171911
1560	NA	NA	NA	NA	diquat2000	water	2	A	5	N2	var.TOF	2296.45949455599
1561	NA	NA	NA	NA	water	NA	2	A	7	CB4856	cv.EXT	0.95950411841483
1562	NA	NA	NA	NA	water	NA	2	A	7	CB4856	cv.TOF	0.575866090495707
1563	NA	NA	NA	NA	water	NA	2	A	7	CB4856	mean.EXT	748.968515742129
1564	NA	NA	NA	NA	water	NA	2	A	7	CB4856	mean.norm.EXT	2.43639877494588
1565	NA	NA	NA	NA	water	NA	2	A	7	CB4856	mean.TOF	257.938530734633
1566	NA	NA	NA	NA	water	NA	2	A	7	CB4856	median.EXT	591
1567	NA	NA	NA	NA	water	NA	2	A	7	CB4856	median.norm.EXT	2.1214953271028
1568	NA	NA	NA	NA	water	NA	2	A	7	CB4856	median.TOF	240
1569	NA	NA	NA	NA	water	NA	2	A	7	CB4856	n	667
1570	NA	NA	NA	NA	water	NA	2	A	7	CB4856	norm.n	222.333333333333
1571	NA	NA	NA	NA	water	NA	2	A	7	CB4856	q10.EXT	114.6
1572	NA	NA	NA	NA	water	NA	2	A	7	CB4856	q10.norm.EXT	1.05241228070175
1573	NA	NA	NA	NA	water	NA	2	A	7	CB4856	q10.TOF	99
1574	NA	NA	NA	NA	water	NA	2	A	7	CB4856	q25.EXT	138
1575	NA	NA	NA	NA	water	NA	2	A	7	CB4856	q25.norm.EXT	1.24270414993307
1576	NA	NA	NA	NA	water	NA	2	A	7	CB4856	q25.TOF	119.5
1577	NA	NA	NA	NA	water	NA	2	A	7	CB4856	q75.EXT	1073
1578	NA	NA	NA	NA	water	NA	2	A	7	CB4856	q75.norm.EXT	3.37303498985801
1579	NA	NA	NA	NA	water	NA	2	A	7	CB4856	q75.TOF	347
1580	NA	NA	NA	NA	water	NA	2	A	7	CB4856	q90.EXT	1833.4
1581	NA	NA	NA	NA	water	NA	2	A	7	CB4856	q90.norm.EXT	4.26743208179925
1582	NA	NA	NA	NA	water	NA	2	A	7	CB4856	q90.TOF	475
1583	NA	NA	NA	NA	water	NA	2	A	7	CB4856	var.EXT	516441.114622869
1584	NA	NA	NA	NA	water	NA	2	A	7	CB4856	var.TOF	22063.5532729131
1585	NA	NA	NA	NA	diquat250	water	2	A	8	CB4856	cv.EXT	0.821852723211434
1586	NA	NA	NA	NA	diquat250	water	2	A	8	CB4856	cv.TOF	0.445000931707093
1587	NA	NA	NA	NA	diquat250	water	2	A	8	CB4856	mean.EXT	565.837423312883
1588	NA	NA	NA	NA	diquat250	water	2	A	8	CB4856	mean.norm.EXT	2.46734885138213
1589	NA	NA	NA	NA	diquat250	water	2	A	8	CB4856	mean.TOF	223.21472392638
1590	NA	NA	NA	NA	diquat250	water	2	A	8	CB4856	median.EXT	571
1591	NA	NA	NA	NA	diquat250	water	2	A	8	CB4856	median.norm.EXT	2.29327253841277
1592	NA	NA	NA	NA	diquat250	water	2	A	8	CB4856	median.TOF	222.5
1593	NA	NA	NA	NA	diquat250	water	2	A	8	CB4856	n	326
1594	NA	NA	NA	NA	diquat250	water	2	A	8	CB4856	norm.n	163
1595	NA	NA	NA	NA	diquat250	water	2	A	8	CB4856	q10.EXT	133
1596	NA	NA	NA	NA	diquat250	water	2	A	8	CB4856	q10.norm.EXT	1.33499163879599
1597	NA	NA	NA	NA	diquat250	water	2	A	8	CB4856	q10.TOF	107.5
1598	NA	NA	NA	NA	diquat250	water	2	A	8	CB4856	q25.EXT	416.25
1599	NA	NA	NA	NA	diquat250	water	2	A	8	CB4856	q25.norm.EXT	1.9570680085924
1600	NA	NA	NA	NA	diquat250	water	2	A	8	CB4856	q25.TOF	146.25
1601	NA	NA	NA	NA	diquat250	water	2	A	8	CB4856	q75.EXT	641.75
1602	NA	NA	NA	NA	diquat250	water	2	A	8	CB4856	q75.norm.EXT	2.9765318627451
1603	NA	NA	NA	NA	diquat250	water	2	A	8	CB4856	q75.TOF	288
1604	NA	NA	NA	NA	diquat250	water	2	A	8	CB4856	q90.EXT	719
1605	NA	NA	NA	NA	diquat250	water	2	A	8	CB4856	q90.norm.EXT	3.74517584811702
1606	NA	NA	NA	NA	diquat250	water	2	A	8	CB4856	q90.TOF	329.5
1607	NA	NA	NA	NA	diquat250	water	2	A	8	CB4856	var.EXT	216257.576564417
1608	NA	NA	NA	NA	diquat250	water	2	A	8	CB4856	var.TOF	9866.59990561586
1609	NA	NA	NA	NA	diquat500	water	2	A	9	CB4856	cv.EXT	0.449309860748121
1610	NA	NA	NA	NA	diquat500	water	2	A	9	CB4856	cv.TOF	0.356274626212969
1611	NA	NA	NA	NA	diquat500	water	2	A	9	CB4856	mean.EXT	424.304721030043
1612	NA	NA	NA	NA	diquat500	water	2	A	9	CB4856	mean.norm.EXT	2.24510563819935
1613	NA	NA	NA	NA	diquat500	water	2	A	9	CB4856	mean.TOF	193.751072961373
1614	NA	NA	NA	NA	diquat500	water	2	A	9	CB4856	median.EXT	430
1615	NA	NA	NA	NA	diquat500	water	2	A	9	CB4856	median.norm.EXT	2.04054054054054
1616	NA	NA	NA	NA	diquat500	water	2	A	9	CB4856	median.TOF	200
1617	NA	NA	NA	NA	diquat500	water	2	A	9	CB4856	n	233
1618	NA	NA	NA	NA	diquat500	water	2	A	9	CB4856	norm.n	77.6666666666667
1619	NA	NA	NA	NA	diquat500	water	2	A	9	CB4856	q10.EXT	214.6
1620	NA	NA	NA	NA	diquat500	water	2	A	9	CB4856	q10.norm.EXT	1.48947368421053
1621	NA	NA	NA	NA	diquat500	water	2	A	9	CB4856	q10.TOF	101.2
1622	NA	NA	NA	NA	diquat500	water	2	A	9	CB4856	q25.EXT	339
1623	NA	NA	NA	NA	diquat500	water	2	A	9	CB4856	q25.norm.EXT	1.80582524271845
1624	NA	NA	NA	NA	diquat500	water	2	A	9	CB4856	q25.TOF	136
1625	NA	NA	NA	NA	diquat500	water	2	A	9	CB4856	q75.EXT	531
1626	NA	NA	NA	NA	diquat500	water	2	A	9	CB4856	q75.norm.EXT	2.59433962264151
1627	NA	NA	NA	NA	diquat500	water	2	A	9	CB4856	q75.TOF	244
1628	NA	NA	NA	NA	diquat500	water	2	A	9	CB4856	q90.EXT	567
1629	NA	NA	NA	NA	diquat500	water	2	A	9	CB4856	q90.norm.EXT	3.28137614678899
1630	NA	NA	NA	NA	diquat500	water	2	A	9	CB4856	q90.TOF	276.8
1631	NA	NA	NA	NA	diquat500	water	2	A	9	CB4856	var.EXT	36345.2472620986
1632	NA	NA	NA	NA	diquat500	water	2	A	9	CB4856	var.TOF	4764.94638893
1633	NA	NA	NA	NA	diquat1000	water	2	A	10	CB4856	cv.EXT	0.618079531834569
1634	NA	NA	NA	NA	diquat1000	water	2	A	10	CB4856	cv.TOF	0.334135490151556
1635	NA	NA	NA	NA	diquat1000	water	2	A	10	CB4856	mean.EXT	272.056497175141
1636	NA	NA	NA	NA	diquat1000	water	2	A	10	CB4856	mean.norm.EXT	1.88321717324579
1637	NA	NA	NA	NA	diquat1000	water	2	A	10	CB4856	mean.TOF	146.570621468927
1638	NA	NA	NA	NA	diquat1000	water	2	A	10	CB4856	median.EXT	259
1639	NA	NA	NA	NA	diquat1000	water	2	A	10	CB4856	median.norm.EXT	1.67741935483871
1640	NA	NA	NA	NA	diquat1000	water	2	A	10	CB4856	median.TOF	149
1641	NA	NA	NA	NA	diquat1000	water	2	A	10	CB4856	n	177
1642	NA	NA	NA	NA	diquat1000	water	2	A	10	CB4856	norm.n	59
1643	NA	NA	NA	NA	diquat1000	water	2	A	10	CB4856	q10.EXT	147.8
1644	NA	NA	NA	NA	diquat1000	water	2	A	10	CB4856	q10.norm.EXT	1.28787185354691
1645	NA	NA	NA	NA	diquat1000	water	2	A	10	CB4856	q10.TOF	84.6
1646	NA	NA	NA	NA	diquat1000	water	2	A	10	CB4856	q25.EXT	191
1647	NA	NA	NA	NA	diquat1000	water	2	A	10	CB4856	q25.norm.EXT	1.465
1648	NA	NA	NA	NA	diquat1000	water	2	A	10	CB4856	q25.TOF	107
1649	NA	NA	NA	NA	diquat1000	water	2	A	10	CB4856	q75.EXT	298
1650	NA	NA	NA	NA	diquat1000	water	2	A	10	CB4856	q75.norm.EXT	2.1044776119403
1651	NA	NA	NA	NA	diquat1000	water	2	A	10	CB4856	q75.TOF	180
1652	NA	NA	NA	NA	diquat1000	water	2	A	10	CB4856	q90.EXT	369.8
1653	NA	NA	NA	NA	diquat1000	water	2	A	10	CB4856	q90.norm.EXT	2.71864594894562
1654	NA	NA	NA	NA	diquat1000	water	2	A	10	CB4856	q90.TOF	197.4
1655	NA	NA	NA	NA	diquat1000	water	2	A	10	CB4856	var.EXT	28275.2808808423
1656	NA	NA	NA	NA	diquat1000	water	2	A	10	CB4856	var.TOF	2398.49640472522
1657	NA	NA	NA	NA	diquat2000	water	2	A	11	CB4856	cv.EXT	1.35696827240494
1658	NA	NA	NA	NA	diquat2000	water	2	A	11	CB4856	cv.TOF	0.542237706711143
1659	NA	NA	NA	NA	diquat2000	water	2	A	11	CB4856	mean.EXT	294.279411764706
1660	NA	NA	NA	NA	diquat2000	water	2	A	11	CB4856	mean.norm.EXT	1.90689714348323
1661	NA	NA	NA	NA	diquat2000	water	2	A	11	CB4856	mean.TOF	137.882352941176
1662	NA	NA	NA	NA	diquat2000	water	2	A	11	CB4856	median.EXT	207.5
1663	NA	NA	NA	NA	diquat2000	water	2	A	11	CB4856	median.norm.EXT	1.57399082568807
1664	NA	NA	NA	NA	diquat2000	water	2	A	11	CB4856	median.TOF	131.5
1665	NA	NA	NA	NA	diquat2000	water	2	A	11	CB4856	n	68
1666	NA	NA	NA	NA	diquat2000	water	2	A	11	CB4856	norm.n	22.6666666666667
1667	NA	NA	NA	NA	diquat2000	water	2	A	11	CB4856	q10.EXT	118.7
1668	NA	NA	NA	NA	diquat2000	water	2	A	11	CB4856	q10.norm.EXT	1.23755169561621
1669	NA	NA	NA	NA	diquat2000	water	2	A	11	CB4856	q10.TOF	66.7
1670	NA	NA	NA	NA	diquat2000	water	2	A	11	CB4856	q25.EXT	153
1671	NA	NA	NA	NA	diquat2000	water	2	A	11	CB4856	q25.norm.EXT	1.38916853094705
1672	NA	NA	NA	NA	diquat2000	water	2	A	11	CB4856	q25.TOF	97.5
1673	NA	NA	NA	NA	diquat2000	water	2	A	11	CB4856	q75.EXT	256.75
1674	NA	NA	NA	NA	diquat2000	water	2	A	11	CB4856	q75.norm.EXT	2.0448198757764
1675	NA	NA	NA	NA	diquat2000	water	2	A	11	CB4856	q75.TOF	156
1676	NA	NA	NA	NA	diquat2000	water	2	A	11	CB4856	q90.EXT	353.6
1677	NA	NA	NA	NA	diquat2000	water	2	A	11	CB4856	q90.norm.EXT	2.9131585054537
1678	NA	NA	NA	NA	diquat2000	water	2	A	11	CB4856	q90.TOF	185.1
1679	NA	NA	NA	NA	diquat2000	water	2	A	11	CB4856	var.EXT	159462.711808604
1680	NA	NA	NA	NA	diquat2000	water	2	A	11	CB4856	var.TOF	5589.80684811238
1681	NA	NA	NA	NA	water	NA	2	B	1	DL238	cv.EXT	1.10931771075781
1682	NA	NA	NA	NA	water	NA	2	B	1	DL238	cv.TOF	0.619693736742532
1683	NA	NA	NA	NA	water	NA	2	B	1	DL238	mean.EXT	678.369065849923
1684	NA	NA	NA	NA	water	NA	2	B	1	DL238	mean.norm.EXT	2.39779884045997
1685	NA	NA	NA	NA	water	NA	2	B	1	DL238	mean.TOF	229.72741194487
1686	NA	NA	NA	NA	water	NA	2	B	1	DL238	median.EXT	470
1687	NA	NA	NA	NA	water	NA	2	B	1	DL238	median.norm.EXT	2.00393700787402
1688	NA	NA	NA	NA	water	NA	2	B	1	DL238	median.TOF	190
1689	NA	NA	NA	NA	water	NA	2	B	1	DL238	n	653
1690	NA	NA	NA	NA	water	NA	2	B	1	DL238	norm.n	217.666666666667
1691	NA	NA	NA	NA	water	NA	2	B	1	DL238	q10.EXT	115
1692	NA	NA	NA	NA	water	NA	2	B	1	DL238	q10.norm.EXT	1.02622670807453
1693	NA	NA	NA	NA	water	NA	2	B	1	DL238	q10.TOF	89.2
1694	NA	NA	NA	NA	water	NA	2	B	1	DL238	q25.EXT	127
1695	NA	NA	NA	NA	water	NA	2	B	1	DL238	q25.norm.EXT	1.12612612612613
1696	NA	NA	NA	NA	water	NA	2	B	1	DL238	q25.TOF	114
1697	NA	NA	NA	NA	water	NA	2	B	1	DL238	q75.EXT	781
1698	NA	NA	NA	NA	water	NA	2	B	1	DL238	q75.norm.EXT	3.09501187648456
1699	NA	NA	NA	NA	water	NA	2	B	1	DL238	q75.TOF	317
1700	NA	NA	NA	NA	water	NA	2	B	1	DL238	q90.EXT	1881.2
1701	NA	NA	NA	NA	water	NA	2	B	1	DL238	q90.norm.EXT	4.72602941176471
1702	NA	NA	NA	NA	water	NA	2	B	1	DL238	q90.TOF	444
1703	NA	NA	NA	NA	water	NA	2	B	1	DL238	var.EXT	566296.613581487
1704	NA	NA	NA	NA	water	NA	2	B	1	DL238	var.TOF	20266.5513486598
1705	NA	NA	NA	NA	diquat250	water	2	B	2	DL238	cv.EXT	0.878010295789484
1706	NA	NA	NA	NA	diquat250	water	2	B	2	DL238	cv.TOF	0.467619371023493
1707	NA	NA	NA	NA	diquat250	water	2	B	2	DL238	mean.EXT	531.72311827957
1708	NA	NA	NA	NA	diquat250	water	2	B	2	DL238	mean.norm.EXT	2.37136917875038
1709	NA	NA	NA	NA	diquat250	water	2	B	2	DL238	mean.TOF	217.086021505376
1710	NA	NA	NA	NA	diquat250	water	2	B	2	DL238	median.EXT	531
1711	NA	NA	NA	NA	diquat250	water	2	B	2	DL238	median.norm.EXT	2.18067226890756
1712	NA	NA	NA	NA	diquat250	water	2	B	2	DL238	median.TOF	211.5
1713	NA	NA	NA	NA	diquat250	water	2	B	2	DL238	n	372
1714	NA	NA	NA	NA	diquat250	water	2	B	2	DL238	norm.n	124
1715	NA	NA	NA	NA	diquat250	water	2	B	2	DL238	q10.EXT	129.1
1716	NA	NA	NA	NA	diquat250	water	2	B	2	DL238	q10.norm.EXT	1.22130030959752
1717	NA	NA	NA	NA	diquat250	water	2	B	2	DL238	q10.TOF	104.1
1718	NA	NA	NA	NA	diquat250	water	2	B	2	DL238	q25.EXT	355.5
1719	NA	NA	NA	NA	diquat250	water	2	B	2	DL238	q25.norm.EXT	1.74972943722944
1720	NA	NA	NA	NA	diquat250	water	2	B	2	DL238	q25.TOF	140
1721	NA	NA	NA	NA	diquat250	water	2	B	2	DL238	q75.EXT	605.25
1722	NA	NA	NA	NA	diquat250	water	2	B	2	DL238	q75.norm.EXT	2.86164649267107
1723	NA	NA	NA	NA	diquat250	water	2	B	2	DL238	q75.TOF	277.5
1724	NA	NA	NA	NA	diquat250	water	2	B	2	DL238	q90.EXT	665
1725	NA	NA	NA	NA	diquat250	water	2	B	2	DL238	q90.norm.EXT	3.6655737704918
1726	NA	NA	NA	NA	diquat250	water	2	B	2	DL238	q90.TOF	316.8
1727	NA	NA	NA	NA	diquat250	water	2	B	2	DL238	var.EXT	217956.739841463
1728	NA	NA	NA	NA	diquat250	water	2	B	2	DL238	var.TOF	10305.0168391154
1729	NA	NA	NA	NA	diquat500	water	2	B	3	DL238	cv.EXT	0.882744735323414
1730	NA	NA	NA	NA	diquat500	water	2	B	3	DL238	cv.TOF	0.420308416404021
1731	NA	NA	NA	NA	diquat500	water	2	B	3	DL238	mean.EXT	410.859778597786
1732	NA	NA	NA	NA	diquat500	water	2	B	3	DL238	mean.norm.EXT	2.14206079101301
1733	NA	NA	NA	NA	diquat500	water	2	B	3	DL238	mean.TOF	192.785977859779
1734	NA	NA	NA	NA	diquat500	water	2	B	3	DL238	median.EXT	393
1735	NA	NA	NA	NA	diquat500	water	2	B	3	DL238	median.norm.EXT	1.94017094017094
1736	NA	NA	NA	NA	diquat500	water	2	B	3	DL238	median.TOF	193
1737	NA	NA	NA	NA	diquat500	water	2	B	3	DL238	n	271
1738	NA	NA	NA	NA	diquat500	water	2	B	3	DL238	norm.n	90.3333333333333
1739	NA	NA	NA	NA	diquat500	water	2	B	3	DL238	q10.EXT	205
1740	NA	NA	NA	NA	diquat500	water	2	B	3	DL238	q10.norm.EXT	1.39181286549708
1741	NA	NA	NA	NA	diquat500	water	2	B	3	DL238	q10.TOF	105
1742	NA	NA	NA	NA	diquat500	water	2	B	3	DL238	q25.EXT	310
1743	NA	NA	NA	NA	diquat500	water	2	B	3	DL238	q25.norm.EXT	1.66128956181312
1744	NA	NA	NA	NA	diquat500	water	2	B	3	DL238	q25.TOF	137
1745	NA	NA	NA	NA	diquat500	water	2	B	3	DL238	q75.EXT	447
1746	NA	NA	NA	NA	diquat500	water	2	B	3	DL238	q75.norm.EXT	2.532917383821
1747	NA	NA	NA	NA	diquat500	water	2	B	3	DL238	q75.TOF	234
1748	NA	NA	NA	NA	diquat500	water	2	B	3	DL238	q90.EXT	521
1749	NA	NA	NA	NA	diquat500	water	2	B	3	DL238	q90.norm.EXT	3.27
1750	NA	NA	NA	NA	diquat500	water	2	B	3	DL238	q90.TOF	269
1751	NA	NA	NA	NA	diquat500	water	2	B	3	DL238	var.EXT	131539.906191062
1752	NA	NA	NA	NA	diquat500	water	2	B	3	DL238	var.TOF	6565.79106191062
1753	NA	NA	NA	NA	diquat1000	water	2	B	4	DL238	cv.EXT	0.753873527642857
1754	NA	NA	NA	NA	diquat1000	water	2	B	4	DL238	cv.TOF	0.364626546399036
1755	NA	NA	NA	NA	diquat1000	water	2	B	4	DL238	mean.EXT	332.209302325581
1756	NA	NA	NA	NA	diquat1000	water	2	B	4	DL238	mean.norm.EXT	1.93298511574645
1757	NA	NA	NA	NA	diquat1000	water	2	B	4	DL238	mean.TOF	170.046511627907
1758	NA	NA	NA	NA	diquat1000	water	2	B	4	DL238	median.EXT	299
1759	NA	NA	NA	NA	diquat1000	water	2	B	4	DL238	median.norm.EXT	1.68758286588475
1760	NA	NA	NA	NA	diquat1000	water	2	B	4	DL238	median.TOF	170.5
1761	NA	NA	NA	NA	diquat1000	water	2	B	4	DL238	n	172
1762	NA	NA	NA	NA	diquat1000	water	2	B	4	DL238	norm.n	57.3333333333333
1763	NA	NA	NA	NA	diquat1000	water	2	B	4	DL238	q10.EXT	191.5
1764	NA	NA	NA	NA	diquat1000	water	2	B	4	DL238	q10.norm.EXT	1.39475426610889
1765	NA	NA	NA	NA	diquat1000	water	2	B	4	DL238	q10.TOF	105.1
1766	NA	NA	NA	NA	diquat1000	water	2	B	4	DL238	q25.EXT	261.75
1767	NA	NA	NA	NA	diquat1000	water	2	B	4	DL238	q25.norm.EXT	1.53095070067547
1768	NA	NA	NA	NA	diquat1000	water	2	B	4	DL238	q25.TOF	126
1769	NA	NA	NA	NA	diquat1000	water	2	B	4	DL238	q75.EXT	340
1770	NA	NA	NA	NA	diquat1000	water	2	B	4	DL238	q75.norm.EXT	2.10083454281567
1771	NA	NA	NA	NA	diquat1000	water	2	B	4	DL238	q75.TOF	199.25
1772	NA	NA	NA	NA	diquat1000	water	2	B	4	DL238	q90.EXT	389
1773	NA	NA	NA	NA	diquat1000	water	2	B	4	DL238	q90.norm.EXT	2.78545294070449
1774	NA	NA	NA	NA	diquat1000	water	2	B	4	DL238	q90.TOF	225.8
1775	NA	NA	NA	NA	diquat1000	water	2	B	4	DL238	var.EXT	62722.0962872297
1776	NA	NA	NA	NA	diquat1000	water	2	B	4	DL238	var.TOF	3844.43057255542
1777	NA	NA	NA	NA	diquat2000	water	2	B	5	DL238	cv.EXT	0.765360387874856
1778	NA	NA	NA	NA	diquat2000	water	2	B	5	DL238	cv.TOF	0.45327366104634
1779	NA	NA	NA	NA	diquat2000	water	2	B	5	DL238	mean.EXT	215.789473684211
1780	NA	NA	NA	NA	diquat2000	water	2	B	5	DL238	mean.norm.EXT	1.77548219368819
1781	NA	NA	NA	NA	diquat2000	water	2	B	5	DL238	mean.TOF	120.017543859649
1782	NA	NA	NA	NA	diquat2000	water	2	B	5	DL238	median.EXT	197
1783	NA	NA	NA	NA	diquat2000	water	2	B	5	DL238	median.norm.EXT	1.53591160220994
1784	NA	NA	NA	NA	diquat2000	water	2	B	5	DL238	median.TOF	110
1785	NA	NA	NA	NA	diquat2000	water	2	B	5	DL238	n	57
1786	NA	NA	NA	NA	diquat2000	water	2	B	5	DL238	norm.n	19
1787	NA	NA	NA	NA	diquat2000	water	2	B	5	DL238	q10.EXT	91.8
1788	NA	NA	NA	NA	diquat2000	water	2	B	5	DL238	q10.norm.EXT	1.12925858951175
1789	NA	NA	NA	NA	diquat2000	water	2	B	5	DL238	q10.TOF	69.6
1790	NA	NA	NA	NA	diquat2000	water	2	B	5	DL238	q25.EXT	138
1791	NA	NA	NA	NA	diquat2000	water	2	B	5	DL238	q25.norm.EXT	1.26890756302521
1792	NA	NA	NA	NA	diquat2000	water	2	B	5	DL238	q25.TOF	86
1793	NA	NA	NA	NA	diquat2000	water	2	B	5	DL238	q75.EXT	247
1794	NA	NA	NA	NA	diquat2000	water	2	B	5	DL238	q75.norm.EXT	2.17582417582418
1795	NA	NA	NA	NA	diquat2000	water	2	B	5	DL238	q75.TOF	142
1796	NA	NA	NA	NA	diquat2000	water	2	B	5	DL238	q90.EXT	297
1797	NA	NA	NA	NA	diquat2000	water	2	B	5	DL238	q90.norm.EXT	2.71701713395639
1798	NA	NA	NA	NA	diquat2000	water	2	B	5	DL238	q90.TOF	164.8
1799	NA	NA	NA	NA	diquat2000	water	2	B	5	DL238	var.EXT	27276.7406015037
1800	NA	NA	NA	NA	diquat2000	water	2	B	5	DL238	var.TOF	2959.44611528822
1801	NA	NA	NA	NA	water	NA	2	B	7	JU258	cv.EXT	0.687591606084294
1802	NA	NA	NA	NA	water	NA	2	B	7	JU258	cv.TOF	0.507285515018177
1803	NA	NA	NA	NA	water	NA	2	B	7	JU258	mean.EXT	1274.51127819549
1804	NA	NA	NA	NA	water	NA	2	B	7	JU258	mean.norm.EXT	3.2847313877332
1805	NA	NA	NA	NA	water	NA	2	B	7	JU258	mean.TOF	353.240601503759
1806	NA	NA	NA	NA	water	NA	2	B	7	JU258	median.EXT	1085.5
1807	NA	NA	NA	NA	water	NA	2	B	7	JU258	median.norm.EXT	3.24869383490073
1808	NA	NA	NA	NA	water	NA	2	B	7	JU258	median.TOF	355
1809	NA	NA	NA	NA	water	NA	2	B	7	JU258	n	266
1810	NA	NA	NA	NA	water	NA	2	B	7	JU258	norm.n	133
1811	NA	NA	NA	NA	water	NA	2	B	7	JU258	q10.EXT	114.5
1812	NA	NA	NA	NA	water	NA	2	B	7	JU258	q10.norm.EXT	1.37877434339825
1813	NA	NA	NA	NA	water	NA	2	B	7	JU258	q10.TOF	91
1814	NA	NA	NA	NA	water	NA	2	B	7	JU258	q25.EXT	658
1815	NA	NA	NA	NA	water	NA	2	B	7	JU258	q25.norm.EXT	2.35849362968333
1816	NA	NA	NA	NA	water	NA	2	B	7	JU258	q25.TOF	216
1817	NA	NA	NA	NA	water	NA	2	B	7	JU258	q75.EXT	1821.5
1818	NA	NA	NA	NA	water	NA	2	B	7	JU258	q75.norm.EXT	4.26121656708637
1819	NA	NA	NA	NA	water	NA	2	B	7	JU258	q75.TOF	484.5
1820	NA	NA	NA	NA	water	NA	2	B	7	JU258	q90.EXT	2558
1821	NA	NA	NA	NA	water	NA	2	B	7	JU258	q90.norm.EXT	4.88563047051179
1822	NA	NA	NA	NA	water	NA	2	B	7	JU258	q90.TOF	587.5
1823	NA	NA	NA	NA	water	NA	2	B	7	JU258	var.EXT	767977.503645907
1824	NA	NA	NA	NA	water	NA	2	B	7	JU258	var.TOF	32110.4324585047
1825	NA	NA	NA	NA	diquat250	water	2	B	8	JU258	cv.EXT	1.03783303782109
1826	NA	NA	NA	NA	diquat250	water	2	B	8	JU258	cv.TOF	0.555708260889955
1827	NA	NA	NA	NA	diquat250	water	2	B	8	JU258	mean.EXT	418.928571428571
1828	NA	NA	NA	NA	diquat250	water	2	B	8	JU258	mean.norm.EXT	2.5870027881424
1829	NA	NA	NA	NA	diquat250	water	2	B	8	JU258	mean.TOF	156.669642857143
1830	NA	NA	NA	NA	diquat250	water	2	B	8	JU258	median.EXT	353.5
1831	NA	NA	NA	NA	diquat250	water	2	B	8	JU258	median.norm.EXT	2.53091301222142
1832	NA	NA	NA	NA	diquat250	water	2	B	8	JU258	median.TOF	135
1833	NA	NA	NA	NA	diquat250	water	2	B	8	JU258	n	112
1834	NA	NA	NA	NA	diquat250	water	2	B	8	JU258	norm.n	112
1835	NA	NA	NA	NA	diquat250	water	2	B	8	JU258	q10.EXT	152
1836	NA	NA	NA	NA	diquat250	water	2	B	8	JU258	q10.norm.EXT	1.44775135135135
1837	NA	NA	NA	NA	diquat250	water	2	B	8	JU258	q10.TOF	91.1
1838	NA	NA	NA	NA	diquat250	water	2	B	8	JU258	q25.EXT	270.75
1839	NA	NA	NA	NA	diquat250	water	2	B	8	JU258	q25.norm.EXT	1.7062053409727
1840	NA	NA	NA	NA	diquat250	water	2	B	8	JU258	q25.TOF	112
1841	NA	NA	NA	NA	diquat250	water	2	B	8	JU258	q75.EXT	452
1842	NA	NA	NA	NA	diquat250	water	2	B	8	JU258	q75.norm.EXT	3.36336276083467
1843	NA	NA	NA	NA	diquat250	water	2	B	8	JU258	q75.TOF	175.75
1844	NA	NA	NA	NA	diquat250	water	2	B	8	JU258	q90.EXT	530.6
1845	NA	NA	NA	NA	diquat250	water	2	B	8	JU258	q90.norm.EXT	3.85464895635674
1846	NA	NA	NA	NA	diquat250	water	2	B	8	JU258	q90.TOF	238.3
1847	NA	NA	NA	NA	diquat250	water	2	B	8	JU258	var.EXT	189031.832689833
1848	NA	NA	NA	NA	diquat250	water	2	B	8	JU258	var.TOF	7579.89888996139
1849	NA	NA	NA	NA	diquat500	water	2	B	9	JU258	cv.EXT	1.38292054172926
1850	NA	NA	NA	NA	diquat500	water	2	B	9	JU258	cv.TOF	0.610293677497198
1851	NA	NA	NA	NA	diquat500	water	2	B	9	JU258	mean.EXT	329.883495145631
1852	NA	NA	NA	NA	diquat500	water	2	B	9	JU258	mean.norm.EXT	2.25368551047465
1853	NA	NA	NA	NA	diquat500	water	2	B	9	JU258	mean.TOF	138.95145631068
1854	NA	NA	NA	NA	diquat500	water	2	B	9	JU258	median.EXT	278
1855	NA	NA	NA	NA	diquat500	water	2	B	9	JU258	median.norm.EXT	2.01898734177215
1856	NA	NA	NA	NA	diquat500	water	2	B	9	JU258	median.TOF	117
1857	NA	NA	NA	NA	diquat500	water	2	B	9	JU258	n	103
1858	NA	NA	NA	NA	diquat500	water	2	B	9	JU258	norm.n	103
1859	NA	NA	NA	NA	diquat500	water	2	B	9	JU258	q10.EXT	126.2
1860	NA	NA	NA	NA	diquat500	water	2	B	9	JU258	q10.norm.EXT	1.31160509970579
1861	NA	NA	NA	NA	diquat500	water	2	B	9	JU258	q10.TOF	81.2
1862	NA	NA	NA	NA	diquat500	water	2	B	9	JU258	q25.EXT	195
1863	NA	NA	NA	NA	diquat500	water	2	B	9	JU258	q25.norm.EXT	1.50190827555499
1864	NA	NA	NA	NA	diquat500	water	2	B	9	JU258	q25.TOF	100
1865	NA	NA	NA	NA	diquat500	water	2	B	9	JU258	q75.EXT	339.5
1866	NA	NA	NA	NA	diquat500	water	2	B	9	JU258	q75.norm.EXT	2.77728174603175
1867	NA	NA	NA	NA	diquat500	water	2	B	9	JU258	q75.TOF	159.5
1868	NA	NA	NA	NA	diquat500	water	2	B	9	JU258	q90.EXT	412.2
1869	NA	NA	NA	NA	diquat500	water	2	B	9	JU258	q90.norm.EXT	3.32606807676145
1870	NA	NA	NA	NA	diquat500	water	2	B	9	JU258	q90.TOF	202.4
1871	NA	NA	NA	NA	diquat500	water	2	B	9	JU258	var.EXT	208120.868646488
1872	NA	NA	NA	NA	diquat500	water	2	B	9	JU258	var.TOF	7191.2427184466
1873	NA	NA	NA	NA	water	NA	2	C	1	DL238	cv.EXT	1.17986653101321
1874	NA	NA	NA	NA	water	NA	2	C	1	DL238	cv.TOF	0.64708350375551
1875	NA	NA	NA	NA	water	NA	2	C	1	DL238	mean.EXT	575.126213592233
1876	NA	NA	NA	NA	water	NA	2	C	1	DL238	mean.norm.EXT	2.18856353711127
1877	NA	NA	NA	NA	water	NA	2	C	1	DL238	mean.TOF	210.917475728155
1878	NA	NA	NA	NA	water	NA	2	C	1	DL238	median.EXT	216.5
1879	NA	NA	NA	NA	water	NA	2	C	1	DL238	median.norm.EXT	1.60822510822511
1880	NA	NA	NA	NA	water	NA	2	C	1	DL238	median.TOF	150.5
1881	NA	NA	NA	NA	water	NA	2	C	1	DL238	n	824
1882	NA	NA	NA	NA	water	NA	2	C	1	DL238	norm.n	274.666666666667
1883	NA	NA	NA	NA	water	NA	2	C	1	DL238	q10.EXT	110
1884	NA	NA	NA	NA	water	NA	2	C	1	DL238	q10.norm.EXT	1.02606805004577
1885	NA	NA	NA	NA	water	NA	2	C	1	DL238	q10.TOF	92
1886	NA	NA	NA	NA	water	NA	2	C	1	DL238	q25.EXT	125
1887	NA	NA	NA	NA	water	NA	2	C	1	DL238	q25.norm.EXT	1.12784512617516
1888	NA	NA	NA	NA	water	NA	2	C	1	DL238	q25.TOF	110
1889	NA	NA	NA	NA	water	NA	2	C	1	DL238	q75.EXT	733.5
1890	NA	NA	NA	NA	water	NA	2	C	1	DL238	q75.norm.EXT	2.71430570298176
1891	NA	NA	NA	NA	water	NA	2	C	1	DL238	q75.TOF	296
1892	NA	NA	NA	NA	water	NA	2	C	1	DL238	q90.EXT	1686.7
1893	NA	NA	NA	NA	water	NA	2	C	1	DL238	q90.norm.EXT	4.42882638342513
1894	NA	NA	NA	NA	water	NA	2	C	1	DL238	q90.TOF	426.7
1895	NA	NA	NA	NA	water	NA	2	C	1	DL238	var.EXT	460460.190612134
1896	NA	NA	NA	NA	water	NA	2	C	1	DL238	var.TOF	18627.1231936203
1897	NA	NA	NA	NA	diquat250	water	2	C	2	DL238	cv.EXT	0.751938138870849
1898	NA	NA	NA	NA	diquat250	water	2	C	2	DL238	cv.TOF	0.378466907828542
1899	NA	NA	NA	NA	diquat250	water	2	C	2	DL238	mean.EXT	526.261904761905
1900	NA	NA	NA	NA	diquat250	water	2	C	2	DL238	mean.norm.EXT	2.30433963825142
1901	NA	NA	NA	NA	diquat250	water	2	C	2	DL238	mean.TOF	224.849206349206
1902	NA	NA	NA	NA	diquat250	water	2	C	2	DL238	median.EXT	516.5
1903	NA	NA	NA	NA	diquat250	water	2	C	2	DL238	median.norm.EXT	2.09605817068504
1904	NA	NA	NA	NA	diquat250	water	2	C	2	DL238	median.TOF	234
1905	NA	NA	NA	NA	diquat250	water	2	C	2	DL238	n	378
1906	NA	NA	NA	NA	diquat250	water	2	C	2	DL238	norm.n	126
1907	NA	NA	NA	NA	diquat250	water	2	C	2	DL238	q10.EXT	198
1908	NA	NA	NA	NA	diquat250	water	2	C	2	DL238	q10.norm.EXT	1.45905994735271
1909	NA	NA	NA	NA	diquat250	water	2	C	2	DL238	q10.TOF	126
1910	NA	NA	NA	NA	diquat250	water	2	C	2	DL238	q25.EXT	381.25
1911	NA	NA	NA	NA	diquat250	water	2	C	2	DL238	q25.norm.EXT	1.81775300171527
1912	NA	NA	NA	NA	diquat250	water	2	C	2	DL238	q25.TOF	157
1913	NA	NA	NA	NA	diquat250	water	2	C	2	DL238	q75.EXT	592.75
1914	NA	NA	NA	NA	diquat250	water	2	C	2	DL238	q75.norm.EXT	2.58536184210526
1915	NA	NA	NA	NA	diquat250	water	2	C	2	DL238	q75.TOF	276
1916	NA	NA	NA	NA	diquat250	water	2	C	2	DL238	q90.EXT	664
1917	NA	NA	NA	NA	diquat250	water	2	C	2	DL238	q90.norm.EXT	3.45406926406926
1918	NA	NA	NA	NA	diquat250	water	2	C	2	DL238	q90.TOF	312
1919	NA	NA	NA	NA	diquat250	water	2	C	2	DL238	var.EXT	156591.467032967
1920	NA	NA	NA	NA	diquat250	water	2	C	2	DL238	var.TOF	7241.66685613238
1921	NA	NA	NA	NA	diquat500	water	2	C	3	DL238	cv.EXT	0.965322280726331
1922	NA	NA	NA	NA	diquat500	water	2	C	3	DL238	cv.TOF	0.382506302767567
1923	NA	NA	NA	NA	diquat500	water	2	C	3	DL238	mean.EXT	417.512295081967
1924	NA	NA	NA	NA	diquat500	water	2	C	3	DL238	mean.norm.EXT	2.06048456770602
1925	NA	NA	NA	NA	diquat500	water	2	C	3	DL238	mean.TOF	198.389344262295
1926	NA	NA	NA	NA	diquat500	water	2	C	3	DL238	median.EXT	387
1927	NA	NA	NA	NA	diquat500	water	2	C	3	DL238	median.norm.EXT	1.8768114793087
1928	NA	NA	NA	NA	diquat500	water	2	C	3	DL238	median.TOF	200
1929	NA	NA	NA	NA	diquat500	water	2	C	3	DL238	n	244
1930	NA	NA	NA	NA	diquat500	water	2	C	3	DL238	norm.n	81.3333333333333
1931	NA	NA	NA	NA	diquat500	water	2	C	3	DL238	q10.EXT	231.3
1932	NA	NA	NA	NA	diquat500	water	2	C	3	DL238	q10.norm.EXT	1.37441245870694
1933	NA	NA	NA	NA	diquat500	water	2	C	3	DL238	q10.TOF	113.3
1934	NA	NA	NA	NA	diquat500	water	2	C	3	DL238	q25.EXT	275.5
1935	NA	NA	NA	NA	diquat500	water	2	C	3	DL238	q25.norm.EXT	1.57390417940877
1936	NA	NA	NA	NA	diquat500	water	2	C	3	DL238	q25.TOF	156.75
1937	NA	NA	NA	NA	diquat500	water	2	C	3	DL238	q75.EXT	454.5
1938	NA	NA	NA	NA	diquat500	water	2	C	3	DL238	q75.norm.EXT	2.28374132005331
1939	NA	NA	NA	NA	diquat500	water	2	C	3	DL238	q75.TOF	238
1940	NA	NA	NA	NA	diquat500	water	2	C	3	DL238	q90.EXT	535.9
1941	NA	NA	NA	NA	diquat500	water	2	C	3	DL238	q90.norm.EXT	2.92583952832607
1942	NA	NA	NA	NA	diquat500	water	2	C	3	DL238	q90.TOF	263.7
1943	NA	NA	NA	NA	diquat500	water	2	C	3	DL238	var.EXT	162436.341411995
1944	NA	NA	NA	NA	diquat500	water	2	C	3	DL238	var.TOF	5758.55972137894
1945	NA	NA	NA	NA	diquat1000	water	2	C	4	DL238	cv.EXT	0.370496725134024
1946	NA	NA	NA	NA	diquat1000	water	2	C	4	DL238	cv.TOF	0.310392663476064
1947	NA	NA	NA	NA	diquat1000	water	2	C	4	DL238	mean.EXT	308.59375
1948	NA	NA	NA	NA	diquat1000	water	2	C	4	DL238	mean.norm.EXT	1.87499644283979
1949	NA	NA	NA	NA	diquat1000	water	2	C	4	DL238	mean.TOF	170.33125
1950	NA	NA	NA	NA	diquat1000	water	2	C	4	DL238	median.EXT	305
1951	NA	NA	NA	NA	diquat1000	water	2	C	4	DL238	median.norm.EXT	1.7031462585034
1952	NA	NA	NA	NA	diquat1000	water	2	C	4	DL238	median.TOF	180.5
1953	NA	NA	NA	NA	diquat1000	water	2	C	4	DL238	n	160
1954	NA	NA	NA	NA	diquat1000	water	2	C	4	DL238	norm.n	53.3333333333333
1955	NA	NA	NA	NA	diquat1000	water	2	C	4	DL238	q10.EXT	199.8
1956	NA	NA	NA	NA	diquat1000	water	2	C	4	DL238	q10.norm.EXT	1.37037453183521
1957	NA	NA	NA	NA	diquat1000	water	2	C	4	DL238	q10.TOF	98
1958	NA	NA	NA	NA	diquat1000	water	2	C	4	DL238	q25.EXT	252
1959	NA	NA	NA	NA	diquat1000	water	2	C	4	DL238	q25.norm.EXT	1.52384949016828
1960	NA	NA	NA	NA	diquat1000	water	2	C	4	DL238	q25.TOF	128.75
1961	NA	NA	NA	NA	diquat1000	water	2	C	4	DL238	q75.EXT	348.25
1962	NA	NA	NA	NA	diquat1000	water	2	C	4	DL238	q75.norm.EXT	2.00875
1963	NA	NA	NA	NA	diquat1000	water	2	C	4	DL238	q75.TOF	204.5
1964	NA	NA	NA	NA	diquat1000	water	2	C	4	DL238	q90.EXT	393.1
1965	NA	NA	NA	NA	diquat1000	water	2	C	4	DL238	q90.norm.EXT	2.67655861199168
1966	NA	NA	NA	NA	diquat1000	water	2	C	4	DL238	q90.TOF	233.1
1967	NA	NA	NA	NA	diquat1000	water	2	C	4	DL238	var.EXT	13072.0288915094
1968	NA	NA	NA	NA	diquat1000	water	2	C	4	DL238	var.TOF	2795.19147012579
1969	NA	NA	NA	NA	diquat2000	water	2	C	5	DL238	cv.EXT	1.06064422215602
1970	NA	NA	NA	NA	diquat2000	water	2	C	5	DL238	cv.TOF	0.357270268956931
1971	NA	NA	NA	NA	diquat2000	water	2	C	5	DL238	mean.EXT	230.794117647059
1972	NA	NA	NA	NA	diquat2000	water	2	C	5	DL238	mean.norm.EXT	1.69579913012472
1973	NA	NA	NA	NA	diquat2000	water	2	C	5	DL238	mean.TOF	128.176470588235
1974	NA	NA	NA	NA	diquat2000	water	2	C	5	DL238	median.EXT	191.5
1975	NA	NA	NA	NA	diquat2000	water	2	C	5	DL238	median.norm.EXT	1.45959873035777
1976	NA	NA	NA	NA	diquat2000	water	2	C	5	DL238	median.TOF	131.5
1977	NA	NA	NA	NA	diquat2000	water	2	C	5	DL238	n	102
1978	NA	NA	NA	NA	diquat2000	water	2	C	5	DL238	norm.n	34
1979	NA	NA	NA	NA	diquat2000	water	2	C	5	DL238	q10.EXT	97.2
1980	NA	NA	NA	NA	diquat2000	water	2	C	5	DL238	q10.norm.EXT	1.12711444289946
1981	NA	NA	NA	NA	diquat2000	water	2	C	5	DL238	q10.TOF	70.1
1982	NA	NA	NA	NA	diquat2000	water	2	C	5	DL238	q25.EXT	149
1983	NA	NA	NA	NA	diquat2000	water	2	C	5	DL238	q25.norm.EXT	1.23897058823529
1984	NA	NA	NA	NA	diquat2000	water	2	C	5	DL238	q25.TOF	89.25
1985	NA	NA	NA	NA	diquat2000	water	2	C	5	DL238	q75.EXT	233
1986	NA	NA	NA	NA	diquat2000	water	2	C	5	DL238	q75.norm.EXT	1.74672612327839
1987	NA	NA	NA	NA	diquat2000	water	2	C	5	DL238	q75.TOF	154
1988	NA	NA	NA	NA	diquat2000	water	2	C	5	DL238	q90.EXT	269.6
1989	NA	NA	NA	NA	diquat2000	water	2	C	5	DL238	q90.norm.EXT	2.38147595356551
1990	NA	NA	NA	NA	diquat2000	water	2	C	5	DL238	q90.TOF	174.8
1991	NA	NA	NA	NA	diquat2000	water	2	C	5	DL238	var.EXT	59922.3631333722
1992	NA	NA	NA	NA	diquat2000	water	2	C	5	DL238	var.TOF	2097.05765870705
1993	NA	NA	NA	NA	water	NA	2	C	7	N2	cv.EXT	0.933815318945686
1994	NA	NA	NA	NA	water	NA	2	C	7	N2	cv.TOF	0.5863981622489
1995	NA	NA	NA	NA	water	NA	2	C	7	N2	mean.EXT	826.731343283582
1996	NA	NA	NA	NA	water	NA	2	C	7	N2	mean.norm.EXT	2.65104880501997
1997	NA	NA	NA	NA	water	NA	2	C	7	N2	mean.TOF	266.408582089552
1998	NA	NA	NA	NA	water	NA	2	C	7	N2	median.EXT	616
1999	NA	NA	NA	NA	water	NA	2	C	7	N2	median.norm.EXT	2.24406078850967
[truncated: 25,784 more rows]
